# Supplementary material for: Soil mycobiomes in native European aspen forests and hybrid aspen plantations have a similar fungal richness but different compositions, mainly driven by edaphic and floristic factors
Source: Frontiers journal article supplement (doi:10.3389/fmicb.2024.1372938), 2024-05-07
Supplement: Presentation_1.pdf [file Presentation_1.pdf]

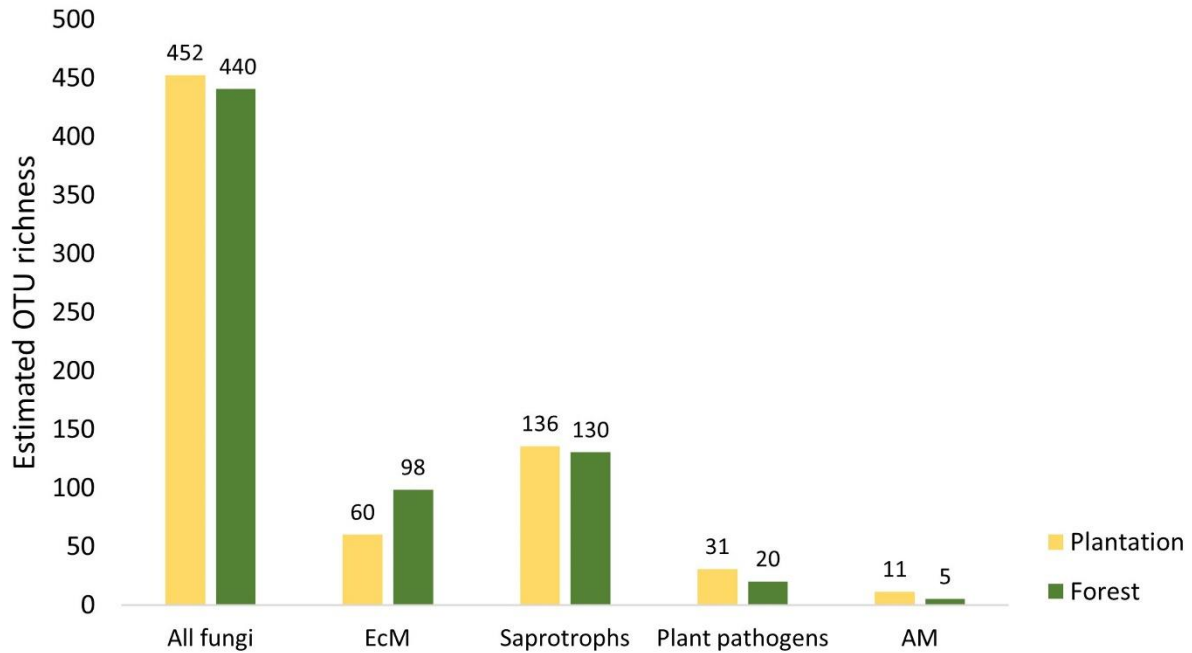

**Figure S1.** Estimated marginal OTU values of all sites and fungal guilds, categorized by plantation (yellow) and forest (green) sites

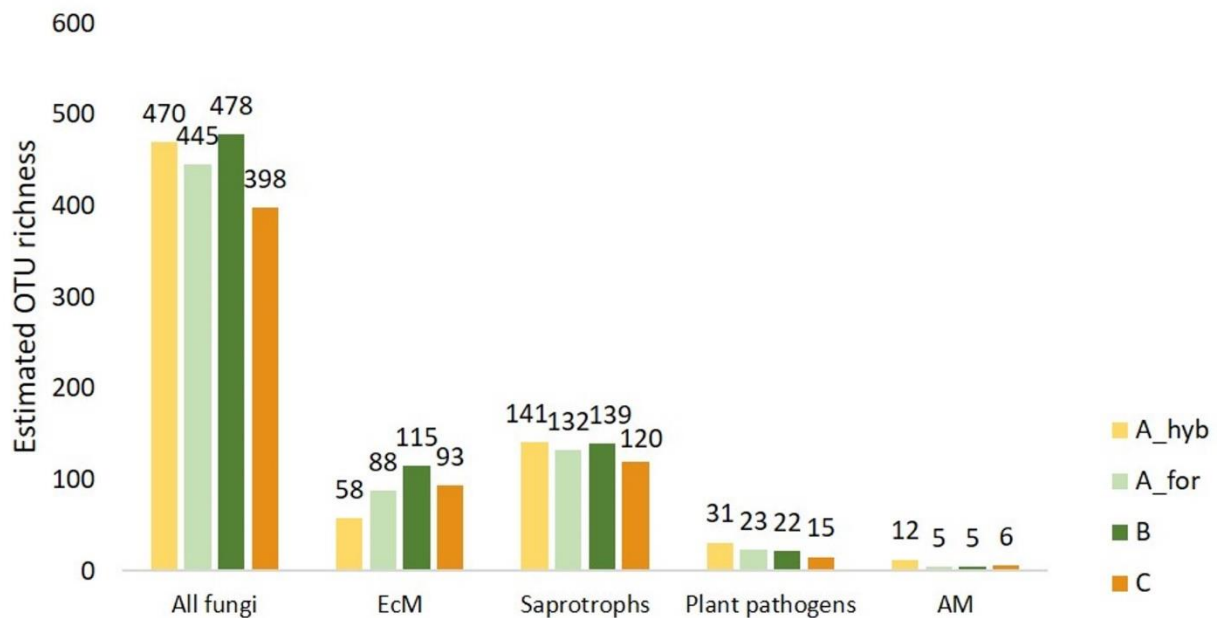

**Figure S2.** Estimated marginal OTU values of studied fungal guilds in selected hybrid aspen plantations and all European aspen stands, categorized by age classes, where (A\_hyb) represents the hybrid aspen plantations aged 17–18 years (n = 9), (A\_nat) refers to European aspen sites aged

8–29 years ( $n = 7$ ), **(B)** indicates European aspen sites aged 30–55 years ( $n = 6$ ), **(C)** refers to European aspen sites aged 65–131 years ( $n = 6$ )

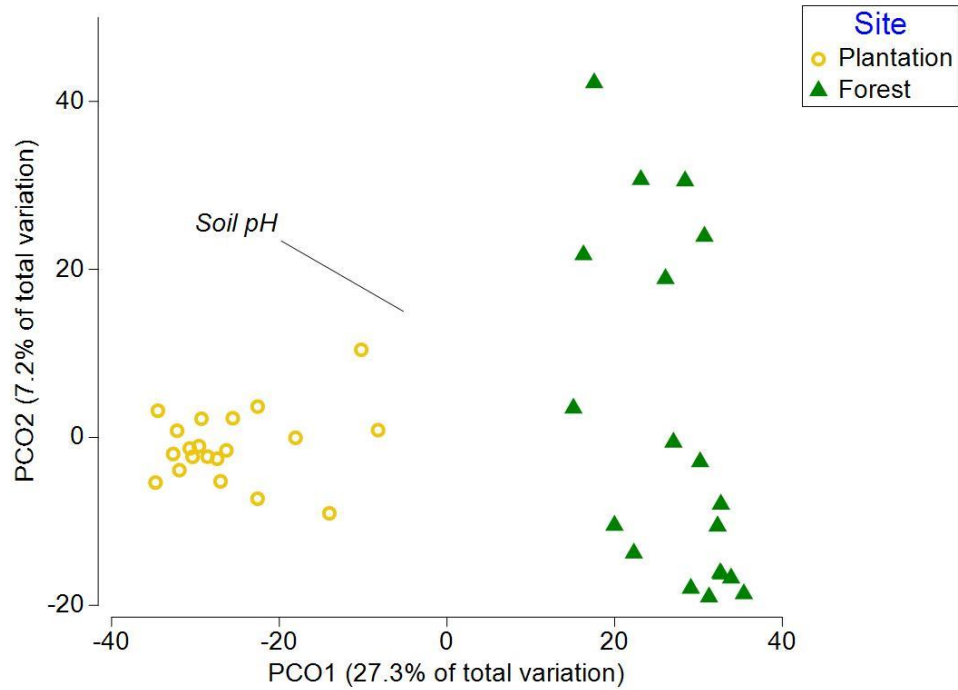

**Figure S3.** Principal coordinate analysis (PCO) based on the relative abundance of all fungal OTUs, describing the variation in fungal community structure in hybrid aspen plantation ( $n=20$ ) and forest ( $n=19$ ) sites. Vector represent the direction of the impact of soil pH concentration.

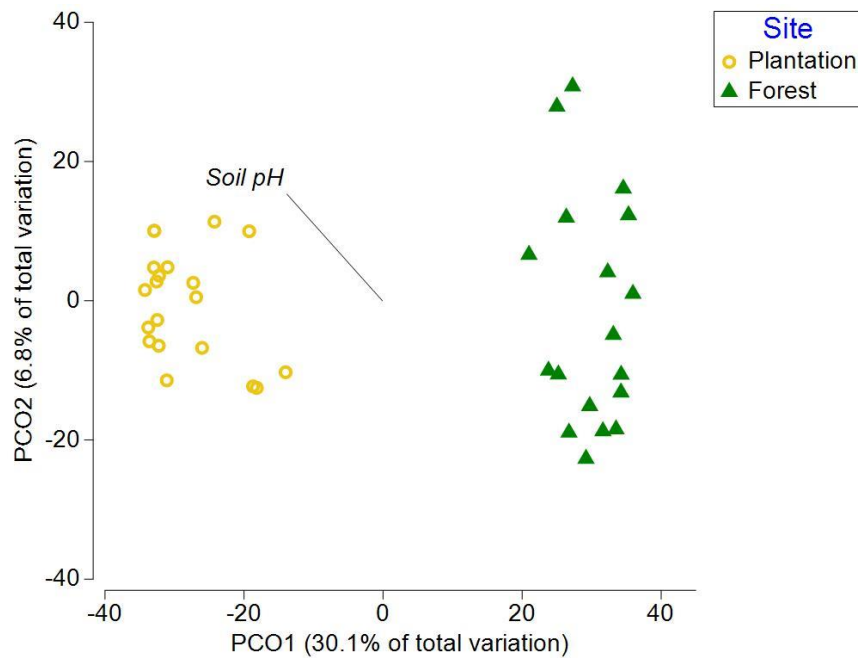

**Figure S4.** Principal coordinate analysis (PCO) based on the relative abundance of fungal OTUs, describing the variation in EcM fungal community structure in hybrid aspen plantation (n=20) and forest (n=19) sites. Vector represent the direction of the impact of soil pH concentration.

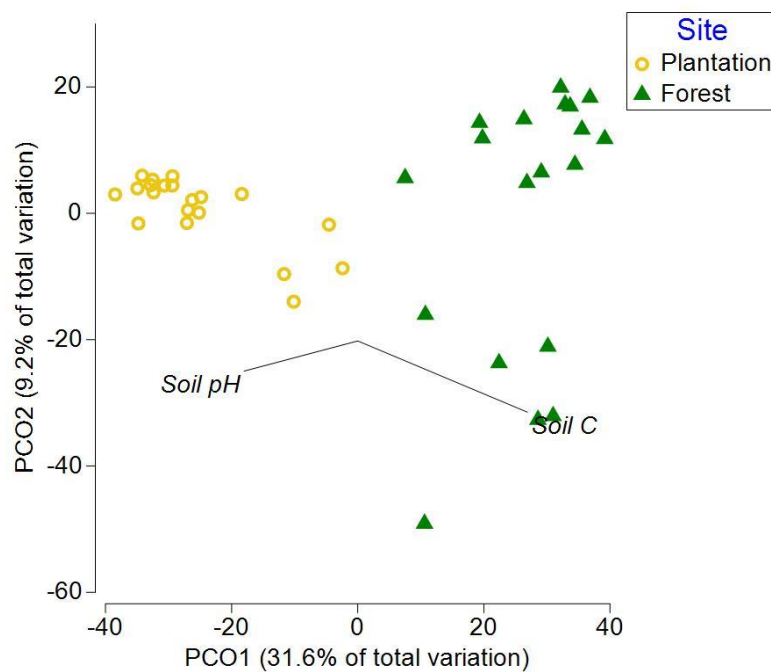

**Figure S5.** Principal coordinate analysis (PCO) based on the relative abundance of fungal OTUs, describing the variation in saprotroph community structure in hybrid aspen plantation (n=20) and

forest (n=19) sites. Vectors represent the direction of the impact of soil C and soil pH concentration.

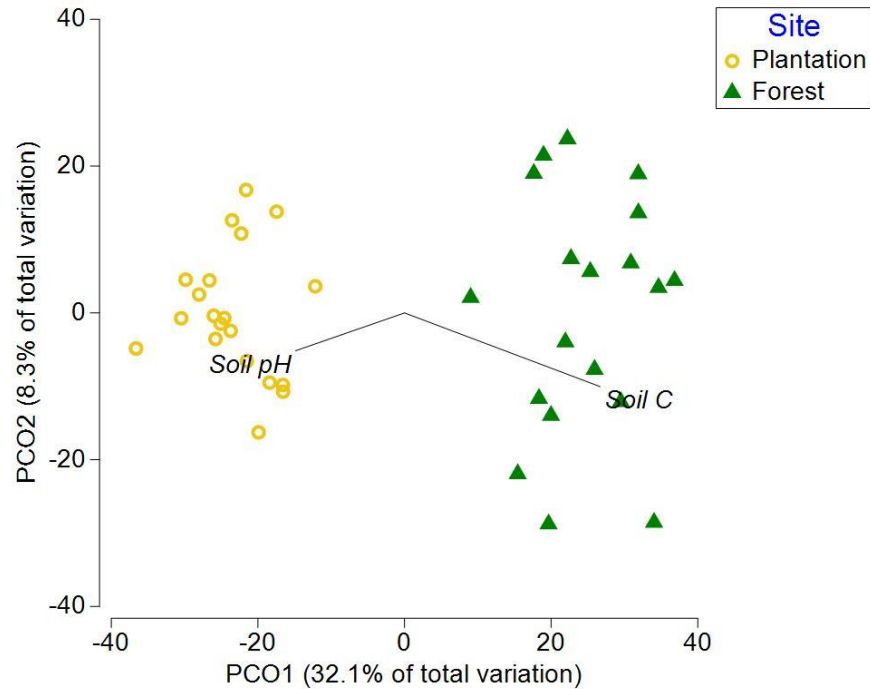

**Figure S6.** Principal coordinate analysis (PCO) based on the relative abundance of fungal OTUs, describing the variation in plant pathogen community structure in hybrid aspen plantation (n=20) and forest (n=19) sites. Vectors represent the direction of the impact of soil C and soil pH concentration.

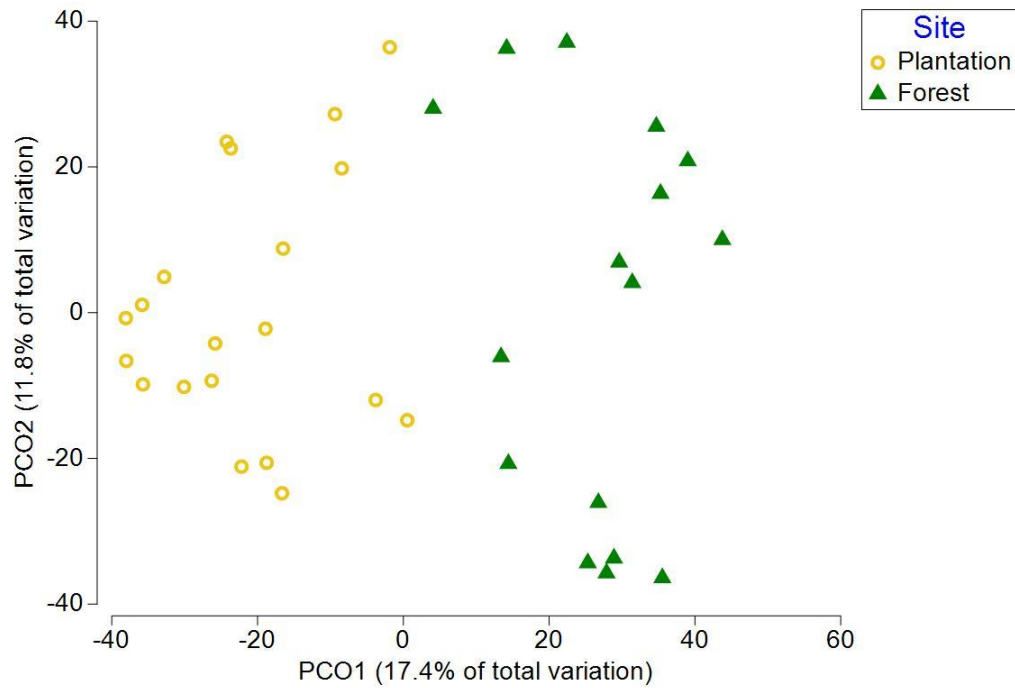

**Figure S7.** Principal coordinate analysis (PCO) based on the relative abundance of fungal OTUs, describing the variation in AM community structure in hybrid aspen plantation (n=20) and forest (n=16) sites.

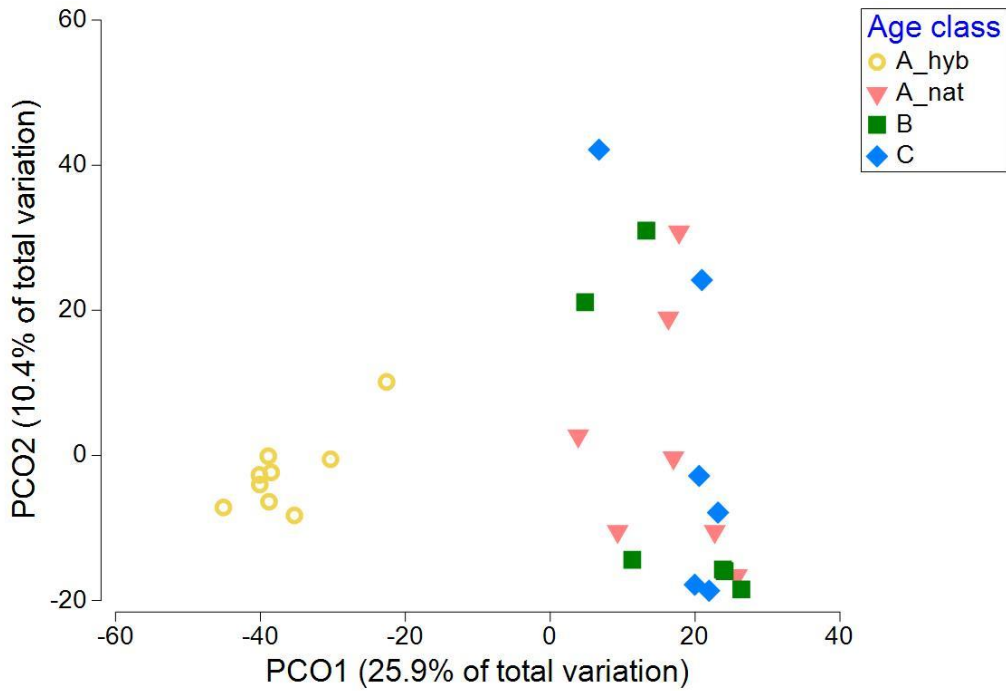

**Figure S8.** Principal coordinate analysis (PCO) based on the relative abundance of fungal OTUs, describing the variation in total fungal community structure, classified by the age classes in selected plantation plots (A\_hyb=17-18 year old, n=9) and in forest (A\_nat= forest sites in age 8-29 (n=7); B= forest sites in age 30-55 (n=6) and C – European aspen sites in age 65-131 (n= 6)).

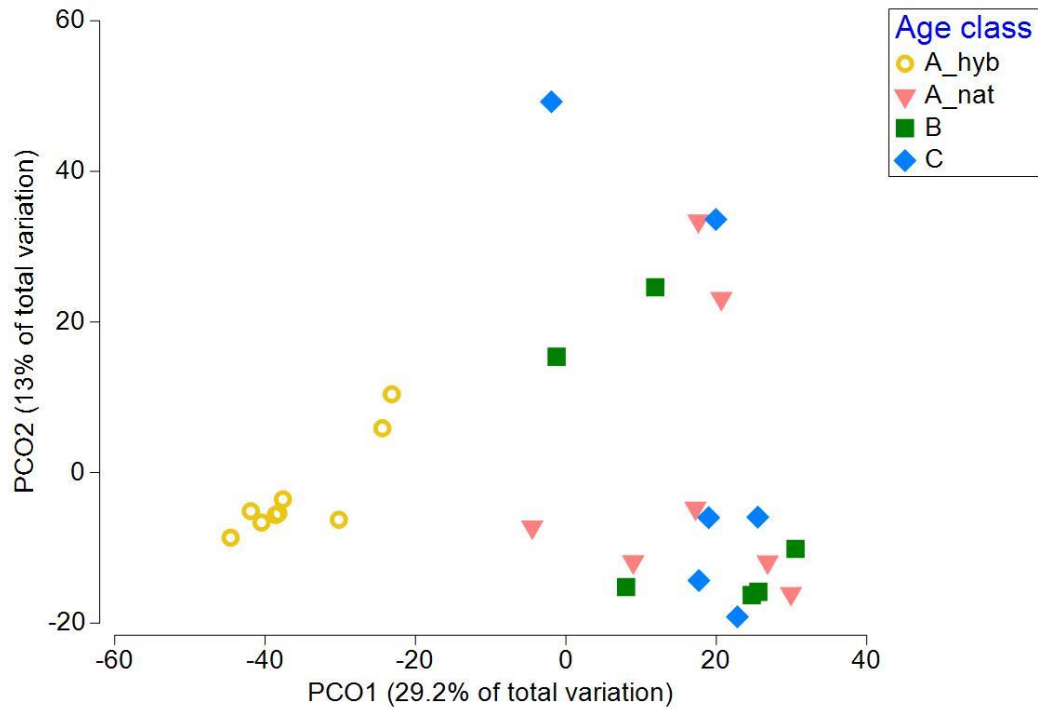

**Figure S10.** Principal coordinate analysis (PCO) based on the relative abundance of fungal OTUs, describing the variation in plant pathogen community structure, classified by the age classes in selected plantation plots (A\_hyb=17-18 year old, n=9) and in forest (A\_nat= forest sites in age 8-29 (n=7); B= forest sites in age 30-55 (n=6) and C – European aspen sites in age 65-131 (n= 6).

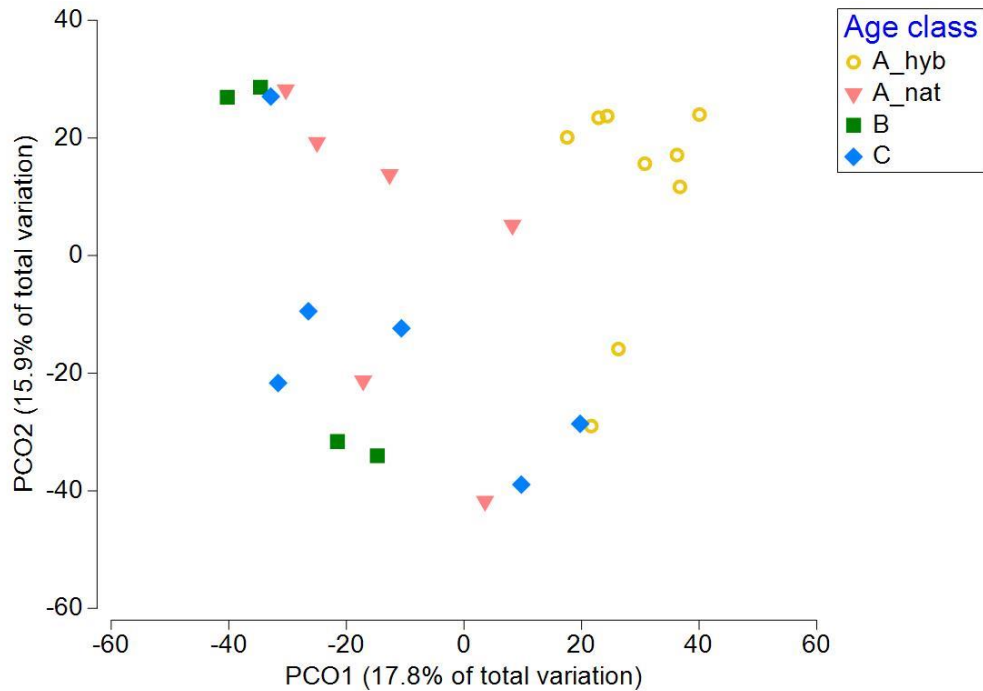

**Figure S11.** Principal coordinate analysis (PCO) based on the relative abundance of fungal OTUs, describing the variation in AM community structure, classified by the age classes in selected plantation plots (A\_hyb=17-18 year old, n=9) and forest (A\_nat= forest sites in age 8-29 (n=9); B= forest sites in age 30-55 (n=4) and C – European aspen sites in age 65-131 (n= 6).
