# Supplementary material for: Soil mycobiomes in native European aspen forests and hybrid aspen plantations have a similar fungal richness but different compositions, mainly driven by edaphic and floristic factors
Source: Front Microbiol. 2024 May 7;15:1372938. doi: 10.3389/fmicb.2024.1372938 (PMC11106484; doi:10.3389/fmicb.2024.1372938)
Supplement: Supplementary Table S1 — Site and soil characteristics (Supplementary Table S1). Detected species hypotheses and their proportions in forest and plantation (Supplementary Table S1.2). [file Table_1.xlsx]

## Sheet: Table S1
Table S1. Site and soil characteristics																													Basal area of tree species (%)
plot code	N	E	Altitude	Age	Total basal area (m2/ha)	Thinning (done/not done)	Volume (m3/ha)	Site (native/plantation	No. of woody understorey species	No. of vascular plant species (woody and herbacious)	No. of bryophytes	No. of upper layer species	pHKCl	P mg/kg	K mg/kg	Mg mg/kg	Ca mg/kg	Cperc	Nperc	C_N	N15	C13	Former land use	Distance from the nearest forest (meters)	Soil water regime	Proportion (%) of EcM understorey woody plant species	List of woody understorey species	EcM host density (%, based on the measured basal areas)	Picea	Pinus	Acer	AlnInc	AlnusGlu	Betula	Corylus	Fraxinus	Populus	Quercus	SalixCap	Sorbus	Tilia	UlmusGla
HB1	58.2773	26.6632	74	17	21.5	not done	92.4	plantation	1	29	11	2	5.1	249	138	914	95	2.23104	0.166425	13.4057	2.92945	-32.8857	agriland	100	auto	100.00	Salix, Betula	100						0.5			21
HB2	57.7684	26.2662	69	18	27	not done	139.7	plantation	3	39	14	3	4.9	195	103	665	51	1.77625	0.140922	12.6045	4.0394	-29.0251	agriland	35	semi	100.00	Picea, Betula, Salix, Populus	98.1481				0.5		1			25.5
HB3	57.9713	26.4937	140	18	22	not done	105.3	plantation	5	14	8	1	5.1	115	64	937	94	1.16126	0.0986103	11.7763	4.38124	-28.9652	grassland	130	semi	80.00	Populus, Salix, Quercus, Sorbus, Padus	100									100
HB4	58.3263	26.5554	71	17	28	not done	187.2	plantation	8	46	9	1	5.5	216	195	1023	133	1.88278	0.149603	12.5852	4.81699	-28.2463	agriland	670	auto	62.50	Betula, Salix, Quercus, Picea, Acer, Fraxinus, Ulmus, Populus	100									100
HB5	58.1792	27.4056	54	17	15	done	135.6	plantation	7	42	12	1	5.8	62	244	1373	116	2.00687	0.165105	12.1551	4.49276	-29.2601	grassland	570	auto	62.50	Populus, Salix, Fraxinus, Acer, Betula, Sorbus, Picea, Tilia	100									100
HB6	58.1186	27.207	55	18	18	done	162.3	plantation	7	39	15	2	4.3	149	69	428	27	2.31287	0.164475	14.0622	3.14225	-29.1238	agriland	290	semi	85.71	Salix, Populus, Picea, Tilia, Betula, Quercus, Rhamnus	100						0.583363			20.4177
HB7	58.501	26.9061	57	17	24.5	not done	199.3	plantation	4	43	13	1	4.2	139	70	233	59	1.91794	0.14338	13.3767	2.24132	-29.544	grassland	180	semi	100.00	Populus, Betula, Salix, Picea	100									100
HB8	58.5907	25.247	29	18	23.5	done	169.5	plantation	3	19	16	1	5.2	35	142	1604	139	3.75627	0.281691	13.3347	3.4764	-28.991	grassland	125	semi	100.00	Betula, Salix, Populus	100									100
HB9	57.7524	26.2552	69	18	19	not done	168.6	plantation	8	29	13	1	4.8	37	82	644	81	1.84159	0.15295	12.0405	4.06044	-29.3052	grassland	115	auto	66.67	Tilia, Betula, Quercus, Rhamnus, Salix, Populus, Picea, Padus, Acer	100									100
HB10	58.504	26.8371	49	17	12	done	86.7	plantation	2	31	9	1	5.1	135	91	465	55	1.11506	0.084897	13.1343	3.93971	-29.0335	agriland	160	auto	100.00	Populus, Salix	100									100
HB11	58.1897	26.3015	77	17	10	done	100.5	plantation	3	36	13	1	5.9	61	210	1245	171	1.9798	0.162376	12.1927	4.24103	-28.7991	grassland	240	auto	100.00	Salix, Betula, Populus	100									100
HB12	57.8748	26.104019	51	17	18.5	not done	78.9	plantation	3	31	12	2	5.8	77	96	1456	153	1.9894	0.163396	12.1753	3.43984	-28.7176	grassland	70	semi	100.00	Picea, Betula, Salix	100	1								17.5
HB13	57.8707	27.2476	97	17	20	not done	99.8	plantation	5	36	17	1	6.6	129	166	1544	82	1.97716	0.148138	13.3468	4.31801	-28.7148	agriland	130	auto	100.00	Salix, Betula, Populus, Picea, sorbus	100									100
HB14	58.2318	27.3133	54	18	29.5	not done	147.6	plantation	5	38	9	2	6	121	175	1224	98	2.12323	0.161564	13.1417	4.61375	-29.0748	grassland	200	auto	83.33	Tilia, Acer, Salix, Populus, Pinus, Picea	100						0.600024			34.8014
HB15	57.9062	26.1043	62	18	19.5	not done	170.9	plantation	6	45	19	1	5.6	117	176	1222	81	2.83451	0.217738	13.0179	3.76018	-28.8493	agriland	150	semi	100.00	Betula, Salix, Populus, Picea, Abies, Pinus	100									100
HB16	58.2323	26.958	73	17	19	done	143.2	plantation	1	*	*	1	4.8	64	64	881	93	1.65048	0.141797	11.6397	4.24111	-28.9048	agriland	50	auto	100.00	Salix	100									100
HB17	57.5552	26.6599	78	17	19.5	not done	89.4	plantation	2	*	*	1	4.3	35	193	1129	147	4.30088	0.333381	12.9008	3.30227	-28.9039	grassland	265	hydro	100.00	Populus, Salix	100									100
HB18	58.7297	25.3475	50	17	15.5	done	181.4	plantation	2	*	*	1	5.1	249	138	914	95	2.44514	0.193844	12.614	5.92693	-28.6604	agriland	200	auto	100.00	Acer, Populus	100									100
HB19	58.8275	26.378	73	17	25	not done	155.3	plantation	7	*	*	1	7.2	73	225	4438	184	3.36751	0.280548	12.0033	5.787	-28.0911	grassland	200	semi	71.43	Populus, Salix, Betula, Acer, Quercus, Padus, Picea	100									165.657
HB20	58.6967	26.3295	64	17	20	not done	111.9	plantation	7	*	*	2	6.5	118	238	2435	245	3.25502	0.259383	12.5491	4.78655	-27.0259	grassland	55	hydro	57.14	Populus, Salix, Acer, Fraxinus, Ribes, Picea, Betula	100									33.2517		1.75009
HB21	58.2667	27.2906	37	8	13	done	60.0948	forest	6	43	36	5	5.18	212.707	983.62	2753.92	650.933	9.05563	0.600051	15.0914	0.620349	-28.533				33.33	Picea, Acer, Fraxinus, Lonicera, Sorbus, Corylus	92.3077	1.50015				3.0003	1.50015			27.0027				6.0006
HB22	58.2725	27.3145	38	9	23.5	done	116.297	forest	6	41	40	3	4.72	42.0699	299.129	679.517	114.431	4.15699	0.265758	15.642	0.252038	-28.4876				66.67	Tilia, Acer, Picea, Corylus, Lonicera, Quercus	93.617									17.9991			2.24989	14.9993
HB23	58.284	27.3133	36	14	23	done	138.921	forest	7	50	39	5	5.26	56.9189	352.71	2751.08	665.893	12.1622	0.775835	15.6762	1.75204	-28.1241				42.86	Sorbus, Fraxinus, Picea, Acer, Lonicera, Tilia, Corylus	86.9565			2.33318		4.66636	8.16612			29.1647				9.33271
HB24	58.2753	27.3266	38	15	12	done	103.335	forest	6	38	39	2	5.4	102.868	343.963	1377.5	273.008	4.25022	0.258745	16.4263	0.405135	-28.9656				50.00	Tilia, Picea, Acer, Salix, Sorbus, Fraxinus	100									18				6
HB25	58.2459	27.282	38	24	31	not done	226.692	forest	2	32	47	3	4.37	65.5451	327.191	1013.06	159.411	7.33421	0.44852	16.352	-0.282167	-27.9923				100.00	Tilia, Picea	100						3			18				10
HB26	58.2578	27.2674	38	28	29	not done	160.235	forest	6	54	43	6	5.06	19.4919	163.453	1338.45	320.339	10.7753	0.651394	16.542	0.81836	-28.2921				33.33	Daphne, Acer, Lonicera, Fraxinus, Pidea, Tilia	84.4828	4.50045		1.50015		12.0012	3.0003			57.0057				9.0009
HB27	58.2838	27.3156	35	29	32.5	not done	592.735	forest	4	30	33	4	4.63	35.9486	189.004	724.136	233.091	3.0534	0.217225	14.0564	2.98819	-28.1912				50.00	Tilia, Picea, Padus, Lonicera	90.7692					6	2			44				13
HB28	58.2855	27.2741	33	30	41.5	not done	517.373	forest	5	33	34	5	5.7	16.815	142.996	1756.63	378.852	6.15039	0.451592	13.6194	3.60049	-28.1771				40.00	Tilia, Picea, Padus, Fraxinus, Sorbus	95.1807	11.25				2.5			2.5	72.5				15
HB29	58.2465	27.2721	39	39	18	not done	465.933	forest	3	34	34	5	4.85	20.1597	125.079	838.361	116.993	5.662	0.326712	17.3302	0.67335	-28.6466				66.67	Corylus, Tilia, Acer	94.4444	1.49993					4.49978		1.49993	10.4995				8.99955
HB30	58.2622	27.288	37	40	44	done	1048.09	forest	6	35	46	5	4.78	36.1723	371.887	662.773	213.346	5.45805	0.340045	16.051	1.54835	-28.408				50.00	Tilia, Picea, Corylus, Lonicera, Acer, Daphne	95.4545	4				4	2			56				22
HB31	58.256	27.2933	37	41	30	not done	431.042	forest	4	39	31	4	4.75	34.7227	222.27	745.9	170.361	2.79313	0.177845	15.7055	1.22885	-28.7903				50.00	Lonicera, Ulmus, Tilia, Picea	96.6667						4			39				15	2
HB32	58.2984	27.3023	33	45	53	not done	494.684	forest	4	30	28	4	5.58	202.72	716.92	4857.99	1331.83	10.6753	0.678697	15.7291	1.48346	-29.0677				50.00	Tilia, Lonicera, Acer, Picea	98.1132					2	6			76				22
HB33	58.2707	27.3264	39	55	29	not done	714.693	forest	2	23	55	4	4.75	159.445	663.297	1220.08	159.957	8.75828	0.540924	16.1913	0.55534	-28.6002				100.00	Tilia, Picea	100	0.5					9.5			6				13
HB34	58.2528	27.2871	36	65	47	not done	450.347	forest	4	42	44	4	4.07	70.1991	246.611	943.965	236.247	5.64156	0.344162	16.3922	1.39499	-28.0593				75.00	Tilia, Fraxinus, Picea, Corylus	100	6.66667					6.66667			41.3333				8
HB35	58.2693	27.2873	36	70	42.5	not done	928.458	forest	6	25	38	4	4.71	37.1403	168	1227.51	335.286	6.86169	0.415032	16.5329	1.36803	-28.2834				33.33	Tilia, Acer, Sorbus, Picea, Lonicera, Padus	100	13.5014					6.0006			99.0099				9.0009
HB36	58.2802	27.335	37	70	32	not done	616.777	forest	5	37	49	4	4.33	48.6175	185.746	684.542	152.346	4.68865	0.259277	18.0835	0.457968	-28.7027				40.00	Tilia, Lonicera, Corylus, Sorbus, Daphne	100	7.5					2.5			62.5				7.5
HB37	58.2643	27.2791	35	75	38	not done	1479.54	forest	7	49	50	5	5.42	25.2622	121.416	2690.8	712.712	13.268	0.810652	16.3671	2.41671	-27.7801				28.57	Picea, Acer, Tilia, Fraxinus, Sorbus, Lonicera, Padus	97.3684	3.50018				3.50018	3.50018			105.005				17.5009
HB39	58.2736	27.3237	37	99	31	not done	1290.31	forest	6	29	39	5	4.59	78.7857	275.213	760.018	143.999	6.63617	0.442247	15.0056	2.05241	-28.0711				50.00	Tilia, Acer, Fraxinus, Corylus, Picea, Padus	96.7742	2					2		2	30				26
HB40	58.2603	27.3049	40	131	22	not done	1122.5	forest	6	26	49	6	4.82	42.9605	293.785	696.452	207.434	4.34936	0.262455	16.5719	0.970174	-28.3163				50.00	Tilia, Populus, Corylus, Quercus, Sorbus, Ulmus, Fraxinus, Acer	86.3636	12		4			4		2	10				12
* marks that values of these samples were gained from the average no. of vascular plant or bryophyte species in hybrid aspen plantations

## Sheet: Table S1.2
Table 1.2 All fungal reads with species hypotheses and proportions of sequences in both, forest and plantations sites. Blank cells on funcional group column means that read could not be assigned.
Fungal functional group	UNITE species hypothesis	No of sequences on hybrid/European aspen sites	% of sequences in hybrid aspen/European aspen sites
SAP	SH196779.07FU	696/6381	0.82/8.77
SAP	SH180109.07FU	3182/2380	3.73/3.27
SAP	SH181879.07FU	984/3511	1.15/4.83
EcM	SH188470.07FU	3924/55	4.6/0.08
	SH190017.07FU	833/2896	0.98/3.98
EcM	SH199612.07FU	584/2565	0.68/3.53
EcM	SH214265.07FU	2210/920	2.59/1.26
SAP	SH196779.07FU	2337/191	2.74/0.26
EcM	SH195877.07FU	136/1743	0.16/2.4
SAP	SH183635.07FU	1839/28	2.16/0.04
SAP	SH483257.07FU	1638/61	1.92/0.08
SAP	SH196092.07FU	5/1550	0.01/2.13
SAP	SH180129.07FU	12/1521	0.01/2.09
SAP	SH193385.07FU	1152/380	1.35/0.52
EcM	SH220959.07FU	1247/25	1.46/0.03
SAP	SH180109.07FU	1020/245	1.2/0.34
EcM	SH177828.07FU	1199/5	1.41/0.01
EcM	SH178628.07FU	1166/6	1.37/0.01
SAP	SH216099.07FU	2/1166	0/1.6
EcM	SH188473.07FU	1140/2	1.34/0
SAP	SH180919.07FU	0/1116	0/1.53
SAP	SH180117.07FU	380/635	0.45/0.87
SAP	SH197643.07FU	791/222	0.93/0.31
Plant pathogen	SH219558.07FU	894/36	1.05/0.05
EcM	SH199338.07FU	928/1	1.09/0
		360/564	0.42/0.78
EcM	SH220959.07FU	690/217	0.81/0.3
EcM	SH197943.07FU	242/641	0.28/0.88
SAP	SH196189.07FU	763/104	0.89/0.14
SAP	SH198656.07FU	376/481	0.44/0.66
EcM	SH218847.07FU	840/3	0.99/0
SAP	SH196090.07FU	0/800	0/1.1
SAP	SH204931.07FU	0/787	0/1.08
EcM	SH186208.07FU	764/0	0.9/0
EcM	SH197943.07FU	402/355	0.47/0.49
SAP	SH180109.07FU	709/37	0.83/0.05
EcM	SH188470.07FU	692/41	0.81/0.06
EcM	SH218845.07FU	715/11	0.84/0.02
Plant pathogen	SH187220.07FU	173/522	0.2/0.72
SAP	SH180109.07FU	146/542	0.17/0.75
EcM		27/653	0.03/0.9
Plant pathogen	SH182794.07FU	664/14	0.78/0.02
Plant pathogen	SH202967.07FU	205/431	0.24/0.59
SAP	SH184180.07FU	584/41	0.68/0.06
SAP	SH208762.07FU	68/540	0.08/0.74
EcM	SH220241.07FU	579/5	0.68/0.01
EcM	SH188532.07FU	457/120	0.54/0.16
	SH186775.07FU	562/6	0.66/0.01
EcM	SH194158.07FU	493/55	0.58/0.08
SAP	SH193385.07FU	413/128	0.48/0.18
EcM	SH197766.07FU	3/534	0/0.73
EcM	SH220517.07FU	0/525	0/0.72
	SH198112.07FU	441/81	0.52/0.11
EcM	SH189422.07FU	0/509	0/0.7
SAP	SH182010.07FU	469/29	0.55/0.04
EcM	SH188469.07FU	353/126	0.41/0.17
	SH013873.07FU	43/433	0.05/0.6
SAP	SH523841.07FU	0/450	0/0.62
SAP	SH180109.07FU	272/169	0.32/0.23
EcM	SH218856.07FU	419/19	0.49/0.03
EcM	SH184647.07FU	426/0	0.5/0
SAP	SH180109.07FU	385/37	0.45/0.05
Pathogen	SH191082.07FU	358/61	0.42/0.08
EcM	SH219856.07FU	358/50	0.42/0.07
EcM	SH188477.07FU	384/23	0.45/0.03
SAP	SH185747.07FU	407/0	0.48/0
	SH202666.07FU	393/0	0.46/0
	SH198115.07FU	156/223	0.18/0.31
Plant pathogen	SH219674.07FU	277/97	0.32/0.13
	SH186775.07FU	282/79	0.33/0.11
Plant pathogen	SH526346.07FU	121/239	0.14/0.33
SAP	SH201128.07FU	270/85	0.32/0.12
EcM	SH187316.07FU	355/0	0.42/0
	SH204309.07FU	255/98	0.3/0.13
EcM	SH186701.07FU	344/0	0.4/0
EcM	SH180261.07FU	312/29	0.37/0.04
EcM	SH177812.07FU	122/209	0.14/0.29
EcM	SH205649.07FU	253/78	0.3/0.11
EcM	SH215994.07FU	257/69	0.3/0.09
SAP	SH199400.07FU	36/290	0.04/0.4
qqq	SH190018.07FU	317/1	0.37/0
EcM	SH189355.07FU	236/80	0.28/0.11
Plant pathogen	SH195288.07FU	310/1	0.36/0
	SH215677.07FU	14/295	0.02/0.41
Plant pathogen	SH211090.07FU	306/2	0.36/0
	SH181908.07FU	306/0	0.36/0
EcM	SH219792.07FU	304/0	0.36/0
EcM	SH220519.07FU	0/296	0/0.41
	SH186775.07FU	286/6	0.34/0.01
EcM	SH185373.07FU	264/18	0.31/0.02
SAP	SH177494.07FU	281/1	0.33/0
	SH196224.07FU	2/280	0/0.38
SAP	SH196779.07FU	74/207	0.09/0.28
SAP	SH214063.07FU	280/0	0.33/0
	SH217071.07FU	254/22	0.3/0.03
Plant pathogen	SH206666.07FU	259/13	0.3/0.02
SAP	SH219559.07FU	237/34	0.28/0.05
Plant pathogen	SH182678.07FU	206/61	0.24/0.08
		266/0	0.31/0
SAP	SH195774.07FU	253/12	0.3/0.02
Plant pathogen	SH202969.07FU	189/75	0.22/0.1
	SH174320.07FU	249/10	0.29/0.01
	SH204309.07FU	235/21	0.28/0.03
SAP	SH201099.07FU	1/246	0/0.34
SAP	SH186050.07FU	33/214	0.04/0.29
EcM	SH184514.07FU	0/246	0/0.34
	SH205052.07FU	11/235	0.01/0.32
EcM	SH217952.07FU	0/243	0/0.33
SAP	SH212842.07FU	178/64	0.21/0.09
EcM	SH184881.07FU	0/239	0/0.33
EcM	SH177840.07FU	0/236	0/0.32
EcM	SH197945.07FU	216/17	0.25/0.02
EcM	SH188470.07FU	228/4	0.27/0.01
EcM	SH218845.07FU	171/60	0.2/0.08
SAP	SH210135.07FU	213/17	0.25/0.02
EcM	SH177828.07FU	0/230	0/0.32
EcM	SH178290.07FU	0/229	0/0.31
EcM	SH178628.07FU	212/14	0.25/0.02
	SH180409.07FU	217/0	0.25/0
EcM	SH179622.07FU	0/216	0/0.3
	SH198115.07FU	108/107	0.13/0.15
EcM	SH208020.07FU	177/36	0.21/0.05
SAP	SH220719.07FU	0/213	0/0.29
EcM	SH220116.07FU	0/212	0/0.29
SAP	SH181342.07FU	26/182	0.03/0.25
SAP	SH183633.07FU	207/1	0.24/0
EcM	SH213656.07FU	208/0	0.24/0
EcM	SH220241.07FU	0/207	0/0.28
EcM	SH182379.07FU	1/206	0/0.28
EcM	SH192283.07FU	0/207	0/0.28
	SH204310.07FU	131/74	0.15/0.1
	SH198115.07FU	87/118	0.1/0.16
	SH193764.07FU	4/199	0/0.27
EcM	SH219342.07FU	200/0	0.23/0
SAP	SH220717.07FU	0/200	0/0.27
SAP	SH183014.07FU	198/1	0.23/0
EcM	SH214073.07FU	7/192	0.01/0.26
	SH212640.07FU	51/148	0.06/0.2
	SH530803.07FU	198/0	0.23/0
	SH200451.07FU	181/16	0.21/0.02
SAP	SH206963.07FU	196/1	0.23/0
SAP	SH185196.07FU	1/195	0/0.27
SAP	SH186927.07FU	192/3	0.23/0
EcM	SH208018.07FU	192/1	0.23/0
EcM	SH178628.07FU	193/0	0.23/0
EcM	SH182396.07FU	60/131	0.07/0.18
EcM	SH188470.07FU	4/186	0/0.26
EcM	SH185332.07FU	0/189	0/0.26
EcM	SH177790.07FU	24/164	0.03/0.23
	SH015811.07FU	187/1	0.22/0
SAP	SH206963.07FU	170/14	0.2/0.02
	SH215930.07FU	20/163	0.02/0.22
EcM	SH208572.07FU	0/182	0/0.25
Pathogen	SH495480.07FU	0/182	0/0.25
Animal parasite	SH212413.07FU	128/53	0.15/0.07
EcM	SH177852.07FU	180/0	0.21/0
SAP	SH183329.07FU	1/178	0/0.24
EcM	SH177792.07FU	0/179	0/0.25
SAP	SH220349.07FU	10/168	0.01/0.23
		137/38	0.16/0.05
EcM	SH179999.07FU	125/50	0.15/0.07
EcM		0/173	0/0.24
EcM	SH176552.07FU	0/172	0/0.24
SAP	SH190595.07FU	3/168	0/0.23
EcM	SH177788.07FU	170/0	0.2/0
	SH198996.07FU	156/14	0.18/0.02
SAP	SH196641.07FU	46/123	0.05/0.17
	SH215260.07FU	20/149	0.02/0.2
Pathogen	SH205491.07FU	1/167	0/0.23
EcM	SH210654.07FU	168/0	0.2/0
	SH198115.07FU	86/81	0.1/0.11
		63/103	0.07/0.14
SAP	SH211035.07FU	165/0	0.19/0
EcM	SH214505.07FU	165/0	0.19/0
SAP	SH214267.07FU	0/162	0/0.22
EcM	SH190174.07FU	158/0	0.19/0
EcM	SH190322.07FU	0/157	0/0.22
SAP		111/46	0.13/0.06
Plant pathogen		52/105	0.06/0.14
EcM	SH188469.07FU	146/11	0.17/0.02
SAP	SH216099.07FU	13/143	0.02/0.2
SAP	SH184007.07FU	2/152	0/0.21
	SH018740.07FU	99/54	0.12/0.07
EcM	SH218850.07FU	153/0	0.18/0
	SH200452.07FU	134/18	0.16/0.02
		12/139	0.01/0.19
	SH193387.07FU	0/151	0/0.21
		149/1	0.17/0
EcM	SH214635.07FU	0/150	0/0.21
	SH475053.07FU	149/0	0.17/0
SAP	SH192084.07FU	0/149	0/0.2
EcM	SH187364.07FU	0/149	0/0.2
EcM	SH218876.07FU	126/23	0.15/0.03
EcM	SH187364.07FU	5/141	0.01/0.19
		119/23	0.14/0.03
EcM	SH218587.07FU	0/142	0/0.2
EcM	SH218849.07FU	141/0	0.17/0
	SH018740.07FU	107/33	0.13/0.05
EcM	SH199898.07FU	131/8	0.15/0.01
Pathogen	SH191083.07FU	70/69	0.08/0.09
Plant pathogen	SH220700.07FU	101/37	0.12/0.05
EcM	SH215994.07FU	137/1	0.16/0
EcM	SH184518.07FU	3/135	0/0.19
SAP	SH214442.07FU	5/133	0.01/0.18
SAP	SH196779.07FU	48/89	0.06/0.12
SAP	SH204986.07FU	4/132	0/0.18
EcM	SH220213.07FU	0/136	0/0.19
	SH223367.07FU	13/123	0.02/0.17
EcM	SH214626.07FU	0/135	0/0.19
SAP	SH214278.07FU	0/135	0/0.19
	SH215932.07FU	42/93	0.05/0.13
EcM	SH196708.07FU	0/133	0/0.18
		122/11	0.14/0.02
EcM	SH007310.07FU	133/0	0.16/0
	SH201613.07FU	0/133	0/0.18
		64/69	0.08/0.09
EcM	SH177804.07FU	98/34	0.11/0.05
qqq	SH182149.07FU	38/93	0.04/0.13
EcM	SH184590.07FU	131/0	0.15/0
	SH198113.07FU	128/3	0.15/0
SAP	SH213394.07FU	23/107	0.03/0.15
Plant pathogen	SH210195.07FU	129/1	0.15/0
SAP	SH197646.07FU	127/3	0.15/0
	SH218624.07FU	102/28	0.12/0.04
EcM	SH177896.07FU	0/128	0/0.18
EcM	SH177801.07FU	128/0	0.15/0
EcM	SH188470.07FU	88/40	0.1/0.05
SAP	SH213395.07FU	32/94	0.04/0.13
EcM	SH218867.07FU	113/11	0.13/0.02
SAP	SH187072.07FU	108/16	0.13/0.02
		67/56	0.08/0.08
EcM	SH184885.07FU	0/123	0/0.17
	SH186775.07FU	119/4	0.14/0.01
SAP	SH216195.07FU	4/119	0/0.16
EcM	SH185333.07FU	1/121	0/0.17
	SH019263.07FU	121/0	0.14/0
		12/108	0.01/0.15
EcM	SH216303.07FU	111/9	0.13/0.01
SAP	SH187863.07FU	0/119	0/0.16
EcM	SH218845.07FU	118/1	0.14/0
	SH030594.07FU	62/57	0.07/0.08
EcM	SH220483.07FU	119/0	0.14/0
		27/91	0.03/0.13
AM	SH025093.07FU	23/95	0.03/0.13
SAP	SH185972.07FU	31/87	0.04/0.12
EcM	SH177788.07FU	118/0	0.14/0
EcM	SH189422.07FU	0/118	0/0.16
EcM	SH211927.07FU	113/4	0.13/0.01
SAP	SH461431.07FU	116/0	0.14/0
	SH174320.07FU	115/0	0.13/0
	SH521395.07FU	115/0	0.13/0
SAP	SH195295.07FU	113/2	0.13/0
EcM	SH177852.07FU	71/43	0.08/0.06
SAP	SH194906.07FU	0/114	0/0.16
SAP		114/0	0.13/0
SAP	SH193938.07FU	2/111	0/0.15
SAP	SH197531.07FU	113/0	0.13/0
SAP		100/13	0.12/0.02
EcM	SH002702.07FU	12/101	0.01/0.14
Animal parasite	SH200393.07FU	55/58	0.06/0.08
EcM	SH182376.07FU	0/113	0/0.16
EcM	SH179623.07FU	0/113	0/0.16
	SH460822.07FU	0/111	0/0.15
Plant pathogen	SH190975.07FU	110/0	0.13/0
Animal parasite	SH214904.07FU	62/48	0.07/0.07
Plant pathogen	SH216704.07FU	109/0	0.13/0
EcM	SH197944.07FU	14/94	0.02/0.13
SAP	SH196779.07FU	77/31	0.09/0.04
EcM	SH214614.07FU	0/108	0/0.15
Pathogen	SH495480.07FU	0/107	0/0.15
Pathogen		104/3	0.12/0
EcM	SH221719.07FU	0/106	0/0.15
	SH177419.07FU	0/105	0/0.14
		70/35	0.08/0.05
EcM	SH002500.07FU	104/0	0.12/0
EcM	SH213927.07FU	0/103	0/0.14
	SH199186.07FU	63/39	0.07/0.05
SAP	SH190868.07FU	9/93	0.01/0.13
SAP		0/101	0/0.14
	SH016202.07FU	80/20	0.09/0.03
	SH198113.07FU	80/18	0.09/0.02
EcM	SH205669.07FU	0/98	0/0.13
EcM	SH189362.07FU	0/97	0/0.13
SAP	SH470419.07FU	86/10	0.1/0.01
	SH022011.07FU	81/14	0.09/0.02
SAP	SH031726.07FU	52/43	0.06/0.06
EcM	SH177852.07FU	88/5	0.1/0.01
Pathogen		0/93	0/0.13
SAP	SH180109.07FU	11/81	0.01/0.11
		88/3	0.1/0
Plant pathogen	SH190975.07FU	65/25	0.08/0.03
		81/9	0.09/0.01
		89/1	0.1/0
Plant pathogen	SH628560.07FU	68/22	0.08/0.03
	SH018057.07FU	70/19	0.08/0.03
Plant pathogen	SH177344.07FU	0/87	0/0.12
Pathogen	SH523929.07FU	2/85	0/0.12
Mycoparasite		9/78	0.01/0.11
EcM	SH189354.07FU	85/0	0.1/0
EcM	SH178192.07FU	84/1	0.1/0
SAP	SH183329.07FU	64/19	0.08/0.03
SAP	SH213396.07FU	0/83	0/0.11
	SH029138.07FU	72/11	0.08/0.02
SAP	SH019168.07FU	72/11	0.08/0.02
Plant pathogen	SH206666.07FU	23/59	0.03/0.08
SAP	SH186416.07FU	38/44	0.04/0.06
	SH213511.07FU	82/0	0.1/0
EcM	SH189377.07FU	73/8	0.09/0.01
Pathogen	SH531933.07FU	0/81	0/0.11
Pathogen	SH191082.07FU	51/30	0.06/0.04
	SH198655.07FU	18/62	0.02/0.09
SAP	SH018038.07FU	79/1	0.09/0
EcM	SH177828.07FU	1/78	0/0.11
	SH029092.07FU	8/71	0.01/0.1
EcM	SH177803.07FU	26/53	0.03/0.07
SAP		46/33	0.05/0.05
SAP	SH006496.07FU	71/7	0.08/0.01
SAP	SH218627.07FU	76/2	0.09/0
EcM	SH177852.07FU	0/78	0/0.11
		42/35	0.05/0.05
EcM	SH217891.07FU	69/8	0.08/0.01
	SH192114.07FU	31/46	0.04/0.06
	SH175271.07FU	76/1	0.09/0
EcM	SH197143.07FU	0/76	0/0.1
	SH202696.07FU	76/0	0.09/0
SAP	SH203438.07FU	42/34	0.05/0.05
SAP	SH220718.07FU	51/25	0.06/0.03
	SH198655.07FU	54/22	0.06/0.03
SAP	SH178704.07FU	75/0	0.09/0
EcM	SH184592.07FU	0/75	0/0.1
EcM	SH177812.07FU	73/2	0.09/0
Plant pathogen	SH195656.07FU	30/45	0.04/0.06
		74/0	0.09/0
EcM	SH218576.07FU	0/74	0/0.1
Pathogen		3/71	0/0.1
Plant pathogen		56/18	0.07/0.02
EcM	SH220220.07FU	0/73	0/0.1
Plant pathogen	SH020484.07FU	65/8	0.08/0.01
SAP	SH016381.07FU	60/13	0.07/0.02
EcM	SH196816.07FU	73/0	0.09/0
SAP	SH183633.07FU	49/24	0.06/0.03
SAP	SH214441.07FU	0/72	0/0.1
EcM	SH177801.07FU	0/72	0/0.1
EcM	SH014445.07FU	63/8	0.07/0.01
SAP	SH004353.07FU	66/4	0.08/0.01
	SH215928.07FU	51/19	0.06/0.03
Plant pathogen	SH021552.07FU	70/0	0.08/0
SAP	SH181082.07FU	6/64	0.01/0.09
		7/62	0.01/0.09
EcM	SH177812.07FU	33/36	0.04/0.05
SAP	SH015841.07FU	69/0	0.08/0
EcM	SH027692.07FU	0/69	0/0.09
	SH195325.07FU	57/11	0.07/0.02
SAP	SH217622.07FU	0/68	0/0.09
	SH217072.07FU	53/15	0.06/0.02
EcM	SH199899.07FU	67/1	0.08/0
EcM	SH191358.07FU	67/0	0.08/0
EcM	SH203893.07FU	0/67	0/0.09
	SH190558.07FU	65/2	0.08/0
EcM	SH190320.07FU	0/67	0/0.09
EcM	SH188532.07FU	63/4	0.07/0.01
EcM	SH184514.07FU	0/66	0/0.09
EcM		0/66	0/0.09
	SH215260.07FU	49/17	0.06/0.02
SAP	SH190044.07FU	38/28	0.04/0.04
SAP	SH218994.07FU	66/0	0.08/0
Pathogen		63/3	0.07/0
	SH465883.07FU	64/2	0.08/0
SAP	SH197801.07FU	0/65	0/0.09
EcM	SH521506.07FU	65/0	0.08/0
EcM	SH189422.07FU	65/0	0.08/0
EcM	SH184628.07FU	3/62	0/0.09
EcM	SH178240.07FU	0/65	0/0.09
SAP	SH181579.07FU	41/24	0.05/0.03
EcM	SH182081.07FU	1/63	0/0.09
SAP	SH190868.07FU	14/50	0.02/0.07
EcM	SH213653.07FU	63/0	0.07/0
EcM	SH184510.07FU	3/60	0/0.08
SAP	SH188388.07FU	0/62	0/0.09
EcM	SH214647.07FU	0/62	0/0.09
SAP	SH016381.07FU	0/62	0/0.09
Plant pathogen	SH204976.07FU	62/0	0.07/0
EcM	SH189391.07FU	61/0	0.07/0
	SH465757.07FU	61/0	0.07/0
	SH191396.07FU	23/37	0.03/0.05
	SH204309.07FU	59/1	0.07/0
SAP	SH027947.07FU	46/14	0.05/0.02
EcM	SH178660.07FU	54/5	0.06/0.01
Pathogen	SH020417.07FU	11/48	0.01/0.07
EcM	SH180254.07FU	53/6	0.06/0.01
EcM	SH217408.07FU	0/59	0/0.08
SAP	SH199051.07FU	57/2	0.07/0
	SH177344.07FU	13/46	0.02/0.06
EcM	SH640102.07FU	54/5	0.06/0.01
SAP	SH206963.07FU	58/1	0.07/0
EcM	SH176685.07FU	58/0	0.07/0
	SH029397.07FU	58/0	0.07/0
	SH497375.07FU	52/6	0.06/0.01
Plant pathogen	SH219615.07FU	6/51	0.01/0.07
	SH198607.07FU	57/0	0.07/0
SAP	SH017057.07FU	57/0	0.07/0
	SH196457.07FU	55/1	0.06/0
	SH192113.07FU	56/0	0.07/0
EcM		0/56	0/0.08
	SH211298.07FU	56/0	0.07/0
SAP	SH199072.07FU	14/41	0.02/0.06
EcM	SH184634.07FU	0/55	0/0.08
EcM	SH177852.07FU	0/55	0/0.08
EcM	SH214628.07FU	0/55	0/0.08
EcM	SH210481.07FU	55/0	0.06/0
Mycoparasite		55/0	0.06/0
EcM	SH179999.07FU	47/8	0.06/0.01
SAP	SH177063.07FU	54/0	0.06/0
EcM	SH179837.07FU	54/0	0.06/0
	SH201605.07FU	0/54	0/0.07
	SH182986.07FU	54/0	0.06/0
		54/0	0.06/0
	SH198112.07FU	52/2	0.06/0
EcM	SH189367.07FU	45/8	0.05/0.01
EcM	SH213657.07FU	53/0	0.06/0
Plant pathogen	SH202970.07FU	43/10	0.05/0.01
EcM	SH182263.07FU	1/52	0/0.07
SAP	SH181579.07FU	53/0	0.06/0
EcM	SH007809.07FU	0/53	0/0.07
	SH202710.07FU	5/47	0.01/0.06
EcM	SH203891.07FU	0/52	0/0.07
EcM	SH189354.07FU	0/52	0/0.07
Pathogen	SH523914.07FU	0/52	0/0.07
		50/2	0.06/0
	SH472477.07FU	47/5	0.06/0.01
		52/0	0.06/0
		51/1	0.06/0
SAP	SH184926.07FU	18/33	0.02/0.05
EcM	SH181002.07FU	40/11	0.05/0.02
EcM	SH201231.07FU	51/0	0.06/0
SAP	SH220720.07FU	0/51	0/0.07
SAP	SH220724.07FU	0/50	0/0.07
Pathogen		50/0	0.06/0
Plant pathogen	SH189947.07FU	50/0	0.06/0
EcM	SH202491.07FU	40/10	0.05/0.01
EcM	SH176517.07FU	3/47	0/0.06
EcM	SH177788.07FU	50/0	0.06/0
SAP		36/14	0.04/0.02
Plant pathogen	SH215493.07FU	21/29	0.02/0.04
	SH024374.07FU	50/0	0.06/0
SAP	SH008257.07FU	8/41	0.01/0.06
EcM	SH179624.07FU	0/49	0/0.07
SAP	SH219018.07FU	43/6	0.05/0.01
SAP	SH210135.07FU	39/10	0.05/0.01
	SH198923.07FU	49/0	0.06/0
SAP	SH177565.07FU	29/20	0.03/0.03
EcM	SH190501.07FU	49/0	0.06/0
SAP	SH205441.07FU	3/46	0/0.06
		49/0	0.06/0
SAP	SH016219.07FU	36/12	0.04/0.02
EcM	SH178192.07FU	7/41	0.01/0.06
SAP	SH175885.07FU	12/36	0.01/0.05
	SH198996.07FU	48/0	0.06/0
SAP	SH186350.07FU	1/47	0/0.06
SAP	SH207981.07FU	0/48	0/0.07
SAP	SH192696.07FU	47/0	0.06/0
Pathogen		0/47	0/0.06
	SH198923.07FU	47/0	0.06/0
	SH526357.07FU	47/0	0.06/0
SAP	SH221917.07FU	42/5	0.05/0.01
Pathogen		31/16	0.04/0.02
	SH016530.07FU	3/44	0/0.06
Pathogen		0/47	0/0.06
EcM	SH177852.07FU	7/40	0.01/0.05
	SH004309.07FU	1/45	0/0.06
EcM	SH199234.07FU	46/0	0.05/0
	SH194255.07FU	27/19	0.03/0.03
EcM	SH178661.07FU	46/0	0.05/0
EcM	SH189362.07FU	11/35	0.01/0.05
	SH212814.07FU	2/44	0/0.06
SAP	SH019022.07FU	45/0	0.05/0
		43/2	0.05/0
EcM	SH184511.07FU	5/40	0.01/0.05
SAP	SH015841.07FU	45/0	0.05/0
	SH199186.07FU	44/0	0.05/0
SAP	SH015421.07FU	44/0	0.05/0
SAP		0/44	0/0.06
	SH186988.07FU	36/8	0.04/0.01
SAP	SH202705.07FU	0/44	0/0.06
EcM	SH201952.07FU	0/44	0/0.06
SAP	SH202458.07FU	41/3	0.05/0
	SH215226.07FU	41/3	0.05/0
	SH183334.07FU	43/0	0.05/0
	SH198117.07FU	24/19	0.03/0.03
EcM	SH218586.07FU	43/0	0.05/0
SAP	SH006496.07FU	42/1	0.05/0
EcM	SH214265.07FU	4/39	0/0.05
EcM	SH189362.07FU	43/0	0.05/0
		42/0	0.05/0
		0/42	0/0.06
	SH196068.07FU	0/42	0/0.06
	SH218111.07FU	42/0	0.05/0
	SH531473.07FU	42/0	0.05/0
EcM	SH200258.07FU	0/42	0/0.06
SAP	SH001975.07FU	42/0	0.05/0
	SH218653.07FU	41/0	0.05/0
		29/12	0.03/0.02
		2/39	0/0.05
Plant pathogen	SH185755.07FU	41/0	0.05/0
SAP	SH014917.07FU	41/0	0.05/0
Mycoparasite	SH182180.07FU	2/39	0/0.05
	SH182991.07FU	39/2	0.05/0
	SH199186.07FU	41/0	0.05/0
SAP	SH190265.07FU	40/0	0.05/0
SAP	SH186576.07FU	39/1	0.05/0
SAP	SH491068.07FU	23/17	0.03/0.02
SAP	SH008510.07FU	36/4	0.04/0.01
SAP	SH181579.07FU	0/40	0/0.05
Pathogen	SH001662.07FU	0/40	0/0.05
		40/0	0.05/0
SAP	SH202654.07FU	32/8	0.04/0.01
	SH026897.07FU	0/40	0/0.05
	SH207652.07FU	38/2	0.04/0
SAP	SH196068.07FU	0/40	0/0.05
EcM	SH188833.07FU	40/0	0.05/0
EcM	SH194439.07FU	0/39	0/0.05
SAP	SH188374.07FU	39/0	0.05/0
	SH203187.07FU	23/16	0.03/0.02
SAP	SH187868.07FU	3/36	0/0.05
SAP	SH210379.07FU	32/7	0.04/0.01
Pathogen	SH461018.07FU	38/1	0.04/0
	SH198655.07FU	14/25	0.02/0.03
EcM	SH218906.07FU	38/0	0.04/0
Animal parasite	SH182747.07FU	30/8	0.04/0.01
SAP	SH493676.07FU	30/8	0.04/0.01
Plant pathogen	SH483334.07FU	0/38	0/0.05
SAP	SH497507.07FU	38/0	0.04/0
SAP	SH206611.07FU	36/2	0.04/0
SAP	SH478777.07FU	6/32	0.01/0.04
SAP	SH217612.07FU	0/38	0/0.05
	SH183132.07FU	37/0	0.04/0
EcM	SH210480.07FU	1/36	0/0.05
		1/36	0/0.05
	SH030693.07FU	37/0	0.04/0
EcM	SH189369.07FU	0/37	0/0.05
SAP	SH185816.07FU	37/0	0.04/0
SAP	SH019168.07FU	0/36	0/0.05
Plant pathogen	SH194393.07FU	27/9	0.03/0.01
	SH201605.07FU	28/8	0.03/0.01
	SH195224.07FU	0/36	0/0.05
SAP		22/14	0.03/0.02
SAP	SH220671.07FU	35/1	0.04/0
Pathogen	SH530119.07FU	19/17	0.02/0.02
EcM	SH007310.07FU	33/3	0.04/0
SAP	SH182099.07FU	33/3	0.04/0
	SH200070.07FU	35/1	0.04/0
		0/35	0/0.05
EcM	SH197143.07FU	0/35	0/0.05
EcM	SH214650.07FU	0/35	0/0.05
EcM	SH178240.07FU	1/34	0/0.05
SAP	SH216493.07FU	3/32	0/0.04
EcM	SH190733.07FU	0/35	0/0.05
EcM	SH189359.07FU	35/0	0.04/0
	SH493707.07FU	26/9	0.03/0.01
	SH194013.07FU	25/10	0.03/0.01
	SH180758.07FU	27/8	0.03/0.01
SAP	SH216870.07FU	25/10	0.03/0.01
SAP	SH179181.07FU	34/0	0.04/0
qqq	SH022621.07FU	8/26	0.01/0.04
	SH496494.07FU	0/34	0/0.05
EcM	SH198244.07FU	27/7	0.03/0.01
EcM	SH222183.07FU	34/0	0.04/0
	SH530144.07FU	12/22	0.01/0.03
	SH212814.07FU	24/10	0.03/0.01
Plant pathogen		20/14	0.02/0.02
Pathogen	SH016828.07FU	30/4	0.04/0.01
SAP	SH180109.07FU	16/18	0.02/0.02
SAP	SH198403.07FU	28/6	0.03/0.01
SAP	SH213541.07FU	5/29	0.01/0.04
EcM	SH211892.07FU	0/34	0/0.05
	SH207620.07FU	1/33	0/0.05
		33/1	0.04/0
Plant pathogen		0/34	0/0.05
EcM		0/34	0/0.05
		31/3	0.04/0
	SH215932.07FU	27/6	0.03/0.01
	SH496492.07FU	0/33	0/0.05
	SH008014.07FU	0/33	0/0.05
	SH215932.07FU	17/16	0.02/0.02
SAP	SH221772.07FU	1/32	0/0.04
SAP		32/1	0.04/0
	SH468459.07FU	16/17	0.02/0.02
		0/33	0/0.05
SAP	SH192004.07FU	7/26	0.01/0.04
	SH199062.07FU	29/4	0.03/0.01
Plant pathogen	SH202967.07FU	12/21	0.01/0.03
EcM	SH214071.07FU	1/32	0/0.04
Plant pathogen	SH177344.07FU	20/13	0.02/0.02
	SH031099.07FU	27/5	0.03/0.01
Plant pathogen	SH185757.07FU	0/32	0/0.04
SAP	SH032520.07FU	23/9	0.03/0.01
SAP	SH002826.07FU	32/0	0.04/0
Animal parasite	SH212413.07FU	28/4	0.03/0.01
Plant pathogen	SH202967.07FU	31/1	0.04/0
		0/32	0/0.04
	SH198112.07FU	32/0	0.04/0
	SH525589.07FU	0/32	0/0.04
EcM	SH177850.07FU	31/1	0.04/0
EcM	SH214695.07FU	0/32	0/0.04
SAP	SH030934.07FU	32/0	0.04/0
	SH211282.07FU	0/31	0/0.04
SAP	SH175911.07FU	10/21	0.01/0.03
	SH213511.07FU	31/0	0.04/0
EcM	SH206367.07FU	20/11	0.02/0.02
SAP	SH196093.07FU	0/31	0/0.04
SAP	SH207148.07FU	1/30	0/0.04
SAP	SH221923.07FU	1/30	0/0.04
EcM	SH216284.07FU	0/31	0/0.04
SAP	SH219026.07FU	31/0	0.04/0
	SH215260.07FU	27/4	0.03/0.01
Pathogen	SH021172.07FU	9/22	0.01/0.03
SAP	SH174412.07FU	10/21	0.01/0.03
EcM	SH218865.07FU	31/0	0.04/0
SAP	SH209070.07FU	25/6	0.03/0.01
EcM	SH179028.07FU	1/29	0/0.04
SAP	SH014390.07FU	0/30	0/0.04
SAP	SH489260.07FU	0/30	0/0.04
SAP	SH190259.07FU	25/5	0.03/0.01
	SH495483.07FU	1/29	0/0.04
SAP	SH192972.07FU	14/16	0.02/0.02
EcM	SH220214.07FU	0/30	0/0.04
SAP	SH194008.07FU	30/0	0.04/0
EcM	SH219856.07FU	1/29	0/0.04
EcM	SH197143.07FU	0/30	0/0.04
	SH211282.07FU	27/3	0.03/0
SAP	SH176910.07FU	6/24	0.01/0.03
SAP	SH196070.07FU	0/30	0/0.04
Pathogen	SH180900.07FU	0/30	0/0.04
SAP	SH196317.07FU	1/29	0/0.04
	SH189973.07FU	24/5	0.03/0.01
SAP	SH187873.07FU	0/29	0/0.04
	SH195295.07FU	0/29	0/0.04
SAP	SH213536.07FU	0/29	0/0.04
EcM	SH196705.07FU	0/29	0/0.04
Pathogen		29/0	0.03/0
	SH186428.07FU	29/0	0.03/0
	SH177344.07FU	0/29	0/0.04
EcM	SH213644.07FU	0/29	0/0.04
	SH220347.07FU	3/26	0/0.04
SAP	SH191727.07FU	29/0	0.03/0
EcM	SH188470.07FU	29/0	0.03/0
EcM	SH186205.07FU	0/29	0/0.04
	SH201671.07FU	29/0	0.03/0
SAP		29/0	0.03/0
EcM	SH002528.07FU	5/24	0.01/0.03
EcM	SH201232.07FU	28/0	0.03/0
SAP	SH201623.07FU	0/28	0/0.04
SAP	SH019022.07FU	28/0	0.03/0
	SH495831.07FU	16/12	0.02/0.02
EcM	SH187549.07FU	0/28	0/0.04
SAP	SH006496.07FU	28/0	0.03/0
SAP	SH218119.07FU	19/9	0.02/0.01
	SH496532.07FU	28/0	0.03/0
SAP	SH207011.07FU	0/28	0/0.04
SAP	SH019131.07FU	28/0	0.03/0
Plant pathogen	SH185030.07FU	28/0	0.03/0
SAP	SH205507.07FU	0/28	0/0.04
EcM	SH188469.07FU	21/7	0.02/0.01
SAP		24/4	0.03/0.01
	SH014372.07FU	28/0	0.03/0
EcM	SH531937.07FU	0/28	0/0.04
	SH205156.07FU	3/25	0/0.03
SAP	SH019131.07FU	4/24	0/0.03
SAP	SH181579.07FU	0/28	0/0.04
SAP	SH220674.07FU	27/0	0.03/0
SAP	SH211662.07FU	1/26	0/0.04
EcM	SH205669.07FU	0/27	0/0.04
EcM	SH222042.07FU	27/0	0.03/0
Pathogen		23/4	0.03/0.01
Mycoparasite	SH025367.07FU	26/1	0.03/0
	SH018740.07FU	0/27	0/0.04
EcM	SH184518.07FU	1/26	0/0.04
SAP	SH199210.07FU	3/24	0/0.03
Pathogen		18/9	0.02/0.01
Pathogen	SH493681.07FU	27/0	0.03/0
	SH489938.07FU	15/12	0.02/0.02
	SH183854.07FU	27/0	0.03/0
SAP	SH207011.07FU	16/11	0.02/0.02
	SH207725.07FU	0/27	0/0.04
EcM	SH218847.07FU	25/2	0.03/0
	SH022601.07FU	0/27	0/0.04
	SH465757.07FU	26/1	0.03/0
SAP	SH007644.07FU	26/1	0.03/0
	SH496409.07FU	27/0	0.03/0
		0/26	0/0.04
EcM	SH176297.07FU	0/26	0/0.04
	SH463951.07FU	26/0	0.03/0
Animal parasite	SH217934.07FU	26/0	0.03/0
	SH195222.07FU	25/1	0.03/0
	SH203659.07FU	26/0	0.03/0
SAP	SH024026.07FU	25/1	0.03/0
		21/5	0.02/0.01
Pathogen	SH462390.07FU	0/26	0/0.04
		1/25	0/0.03
	SH521399.07FU	26/0	0.03/0
	SH215245.07FU	0/26	0/0.04
Plant pathogen	SH213623.07FU	26/0	0.03/0
SAP	SH014969.07FU	18/8	0.02/0.01
	SH211018.07FU	23/3	0.03/0
		23/3	0.03/0
	SH007891.07FU	26/0	0.03/0
SAP	SH187866.07FU	24/1	0.03/0
	SH186441.07FU	12/13	0.01/0.02
		13/12	0.02/0.02
SAP	SH220366.07FU	0/25	0/0.03
Pathogen	SH001662.07FU	0/25	0/0.03
Pathogen		22/3	0.03/0
EcM	SH010195.07FU	22/3	0.03/0
AM	SH524902.07FU	25/0	0.03/0
SAP	SH007215.07FU	25/0	0.03/0
SAP	SH175879.07FU	12/13	0.01/0.02
EcM	SH195286.07FU	25/0	0.03/0
EcM	SH187316.07FU	25/0	0.03/0
EcM	SH185331.07FU	0/25	0/0.03
SAP	SH177726.07FU	4/21	0/0.03
	SH489654.07FU	8/17	0.01/0.02
EcM		0/24	0/0.03
	SH003725.07FU	24/0	0.03/0
EcM	SH187550.07FU	24/0	0.03/0
Pathogen		22/2	0.03/0
	SH215930.07FU	24/0	0.03/0
	SH020898.07FU	24/0	0.03/0
Plant pathogen	SH190975.07FU	4/20	0/0.03
SAP	SH190265.07FU	18/6	0.02/0.01
EcM	SH176401.07FU	0/24	0/0.03
EcM	SH188532.07FU	17/7	0.02/0.01
Pathogen		22/2	0.03/0
		0/24	0/0.03
SAP	SH205943.07FU	24/0	0.03/0
SAP	SH197643.07FU	7/17	0.01/0.02
SAP	SH218994.07FU	24/0	0.03/0
SAP	SH214432.07FU	0/24	0/0.03
Plant pathogen	SH174294.07FU	24/0	0.03/0
SAP		0/24	0/0.03
SAP		23/0	0.03/0
	SH016202.07FU	23/0	0.03/0
SAP	SH206109.07FU	0/23	0/0.03
Pathogen	SH020058.07FU	14/9	0.02/0.01
SAP	SH181579.07FU	15/8	0.02/0.01
EcM	SH222335.07FU	12/11	0.01/0.02
EcM	SH214265.07FU	0/23	0/0.03
	SH221281.07FU	0/23	0/0.03
		23/0	0.03/0
Pathogen	SH190716.07FU	23/0	0.03/0
EcM	SH187364.07FU	0/23	0/0.03
Pathogen		0/23	0/0.03
SAP	SH192085.07FU	0/23	0/0.03
SAP	SH217880.07FU	18/4	0.02/0.01
Plant pathogen	SH207851.07FU	0/22	0/0.03
SAP	SH177054.07FU	21/1	0.02/0
EcM	SH220959.07FU	0/22	0/0.03
Pathogen	SH461018.07FU	5/17	0.01/0.02
EcM	SH184393.07FU	0/22	0/0.03
SAP	SH177007.07FU	16/6	0.02/0.01
AM	SH482592.07FU	0/22	0/0.03
EcM		0/22	0/0.03
	SH213755.07FU	22/0	0.03/0
EcM	SH218860.07FU	22/0	0.03/0
SAP	SH192987.07FU	18/4	0.02/0.01
EcM	SH178628.07FU	22/0	0.03/0
	SH028576.07FU	11/11	0.01/0.02
EcM	SH215995.07FU	12/10	0.01/0.01
	SH195222.07FU	22/0	0.03/0
EcM	SH205649.07FU	2/20	0/0.03
SAP	SH188334.07FU	0/22	0/0.03
qqq	SH190020.07FU	22/0	0.03/0
Plant pathogen	SH177344.07FU	0/22	0/0.03
		22/0	0.03/0
SAP	SH212869.07FU	0/22	0/0.03
EcM	SH209553.07FU	21/0	0.02/0
SAP	SH187730.07FU	21/0	0.02/0
EcM	SH178240.07FU	10/11	0.01/0.02
		21/0	0.02/0
Plant pathogen	SH203716.07FU	0/21	0/0.03
	SH199128.07FU	1/20	0/0.03
EcM	SH190568.07FU	0/21	0/0.03
EcM	SH192855.07FU	0/21	0/0.03
	SH523869.07FU	0/21	0/0.03
	SH198112.07FU	0/21	0/0.03
SAP	SH177214.07FU	21/0	0.02/0
SAP	SH219742.07FU	1/20	0/0.03
SAP	SH466660.07FU	20/1	0.02/0
Pathogen		0/21	0/0.03
EcM	SH188470.07FU	21/0	0.02/0
	SH198554.07FU	15/6	0.02/0.01
SAP	SH484969.07FU	13/8	0.02/0.01
Plant pathogen	SH523879.07FU	0/21	0/0.03
		13/8	0.02/0.01
	SH203402.07FU	21/0	0.02/0
SAP	SH202705.07FU	0/21	0/0.03
	SH204310.07FU	21/0	0.02/0
AM	SH194683.07FU	20/1	0.02/0
SAP	SH022905.07FU	15/6	0.02/0.01
	SH478777.07FU	4/17	0/0.02
EcM	SH177310.07FU	16/5	0.02/0.01
SAP	SH219741.07FU	1/20	0/0.03
	SH024374.07FU	18/3	0.02/0
EcM	SH176404.07FU	21/0	0.02/0
EcM	SH188517.07FU	10/11	0.01/0.02
SAP	SH178376.07FU	21/0	0.02/0
AM	SH176129.07FU	21/0	0.02/0
SAP	SH630186.07FU	19/1	0.02/0
EcM	SH176516.07FU	20/0	0.02/0
	SH194252.07FU	0/20	0/0.03
EcM	SH214615.07FU	0/20	0/0.03
	SH029551.07FU	20/0	0.02/0
SAP	SH185141.07FU	0/20	0/0.03
	SH198923.07FU	20/0	0.02/0
	SH006649.07FU	3/17	0/0.02
Pathogen	SH630550.07FU	20/0	0.02/0
EcM	SH219800.07FU	20/0	0.02/0
	SH530098.07FU	13/7	0.02/0.01
	SH018740.07FU	0/20	0/0.03
SAP	SH193032.07FU	5/15	0.01/0.02
EcM		0/20	0/0.03
EcM	SH177918.07FU	0/20	0/0.03
SAP	SH208301.07FU	5/15	0.01/0.02
EcM	SH188503.07FU	1/19	0/0.03
SAP	SH196185.07FU	12/8	0.01/0.01
SAP	SH489260.07FU	0/20	0/0.03
SAP	SH015841.07FU	19/1	0.02/0
SAP	SH218627.07FU	20/0	0.02/0
SAP	SH211193.07FU	1/19	0/0.03
SAP	SH015107.07FU	16/4	0.02/0.01
EcM	SH177923.07FU	0/19	0/0.03
SAP	SH202705.07FU	0/19	0/0.03
	SH488438.07FU	19/0	0.02/0
	SH182180.07FU	0/19	0/0.03
SAP	SH018038.07FU	19/0	0.02/0
	SH494351.07FU	19/0	0.02/0
Plant pathogen	SH482410.07FU	19/0	0.02/0
EcM	SH218844.07FU	3/16	0/0.02
Pathogen	SH211269.07FU	10/9	0.01/0.01
	SH198112.07FU	0/19	0/0.03
Pathogen	SH020416.07FU	10/9	0.01/0.01
	SH533617.07FU	0/19	0/0.03
	SH026332.07FU	11/8	0.01/0.01
EcM	SH216685.07FU	19/0	0.02/0
	SH467724.07FU	0/19	0/0.03
	SH017734.07FU	17/2	0.02/0
	SH015811.07FU	17/2	0.02/0
SAP	SH026241.07FU	0/19	0/0.03
EcM	SH191174.07FU	0/19	0/0.03
	SH220956.07FU	19/0	0.02/0
		18/1	0.02/0
SAP		0/18	0/0.02
Pathogen	SH630550.07FU	0/18	0/0.02
EcM	SH198112.07FU	4/14	0/0.02
	SH208537.07FU	18/0	0.02/0
SAP	SH030693.07FU	18/0	0.02/0
	SH013006.07FU	16/2	0.02/0
	SH020207.07FU	12/6	0.01/0.01
	SH194777.07FU	18/0	0.02/0
SAP	SH027408.07FU	18/0	0.02/0
Plant pathogen	SH186594.07FU	17/1	0.02/0
SAP	SH215110.07FU	18/0	0.02/0
SAP	SH198204.07FU	16/2	0.02/0
SAP	SH187073.07FU	14/4	0.02/0.01
Pathogen	SH180900.07FU	0/18	0/0.02
EcM	SH188470.07FU	18/0	0.02/0
EcM	SH182264.07FU	0/18	0/0.02
	SH174318.07FU	10/8	0.01/0.01
	SH212814.07FU	0/18	0/0.02
Pathogen	SH016828.07FU	12/6	0.01/0.01
AM	SH016957.07FU	18/0	0.02/0
		2/16	0/0.02
EcM	SH027692.07FU	0/18	0/0.02
Plant pathogen	SH205225.07FU	18/0	0.02/0
EcM	SH182656.07FU	2/15	0/0.02
	SH174320.07FU	2/15	0/0.02
		17/0	0.02/0
	SH200804.07FU	0/17	0/0.02
EcM	SH214265.07FU	4/13	0/0.02
SAP	SH185974.07FU	3/14	0/0.02
SAP	SH220353.07FU	17/0	0.02/0
EcM	SH199502.07FU	17/0	0.02/0
SAP		0/17	0/0.02
Pathogen		17/0	0.02/0
SAP	SH192114.07FU	17/0	0.02/0
EcM	SH177803.07FU	17/0	0.02/0
Pathogen		14/3	0.02/0
Pathogen		17/0	0.02/0
Plant pathogen	SH526346.07FU	11/6	0.01/0.01
AM	SH001003.07FU	10/7	0.01/0.01
Pathogen	SH005225.07FU	17/0	0.02/0
Pathogen	SH204497.07FU	6/11	0.01/0.02
AM	SH014991.07FU	17/0	0.02/0
	SH018749.07FU	0/17	0/0.02
	SH209858.07FU	16/1	0.02/0
EcM	SH185374.07FU	7/10	0.01/0.01
EcM	SH197927.07FU	0/17	0/0.02
EcM	SH177840.07FU	0/17	0/0.02
EcM	SH197163.07FU	0/17	0/0.02
EcM	SH219983.07FU	1/16	0/0.02
Plant pathogen	SH217585.07FU	7/10	0.01/0.01
	SH491892.07FU	17/0	0.02/0
Plant pathogen	SH020484.07FU	17/0	0.02/0
	SH183898.07FU	0/17	0/0.02
SAP	SH194079.07FU	9/8	0.01/0.01
Pathogen		1/16	0/0.02
SAP	SH196092.07FU	0/17	0/0.02
SAP	SH182680.07FU	0/17	0/0.02
SAP	SH201404.07FU	1/16	0/0.02
Pathogen		0/17	0/0.02
SAP	SH183008.07FU	17/0	0.02/0
SAP	SH205943.07FU	13/4	0.02/0.01
	SH217842.07FU	0/17	0/0.02
SAP	SH181078.07FU	0/17	0/0.02
SAP	SH529064.07FU	17/0	0.02/0
SAP	SH006496.07FU	17/0	0.02/0
		16/0	0.02/0
	SH493676.07FU	16/0	0.02/0
	SH193764.07FU	0/16	0/0.02
EcM	SH211892.07FU	0/16	0/0.02
SAP	SH198466.07FU	16/0	0.02/0
EcM	SH027692.07FU	0/16	0/0.02
Animal parasite	SH484573.07FU	16/0	0.02/0
EcM	SH214610.07FU	0/16	0/0.02
	SH186783.07FU	16/0	0.02/0
	SH018740.07FU	13/3	0.02/0
SAP	SH202978.07FU	10/6	0.01/0.01
Pathogen		13/3	0.02/0
SAP	SH217623.07FU	6/10	0.01/0.01
	SH215250.07FU	0/16	0/0.02
	SH198659.07FU	14/2	0.02/0
SAP	SH214265.07FU	0/16	0/0.02
	SH184176.07FU	1/15	0/0.02
	SH018740.07FU	16/0	0.02/0
SAP	SH179214.07FU	14/2	0.02/0
SAP	SH208301.07FU	6/10	0.01/0.01
	SH190990.07FU	16/0	0.02/0
	SH198112.07FU	1/15	0/0.02
	SH008012.07FU	16/0	0.02/0
Pathogen		0/16	0/0.02
	SH213147.07FU	0/16	0/0.02
	SH193764.07FU	15/1	0.02/0
SAP	SH181628.07FU	9/7	0.01/0.01
EcM	SH196704.07FU	0/16	0/0.02
SAP	SH185817.07FU	16/0	0.02/0
		9/7	0.01/0.01
SAP	SH484969.07FU	16/0	0.02/0
EcM	SH187702.07FU	0/16	0/0.02
		14/2	0.02/0
Pathogen	SH493681.07FU	16/0	0.02/0
EcM	SH214265.07FU	0/16	0/0.02
SAP	SH205943.07FU	16/0	0.02/0
SAP	SH494772.07FU	16/0	0.02/0
Plant pathogen	SH177344.07FU	16/0	0.02/0
		8/8	0.01/0.01
	SH523930.07FU	0/16	0/0.02
EcM	SH188128.07FU	16/0	0.02/0
Plant pathogen	SH216672.07FU	16/0	0.02/0
	SH186805.07FU	1/15	0/0.02
SAP	SH214353.07FU	15/0	0.02/0
Pathogen		0/15	0/0.02
	SH208312.07FU	14/1	0.02/0
	SH204309.07FU	13/2	0.02/0
SAP		13/2	0.02/0
	SH018364.07FU	15/0	0.02/0
SAP	SH477118.07FU	10/5	0.01/0.01
Pathogen	SH493962.07FU	2/13	0/0.02
	SH211527.07FU	0/15	0/0.02
	SH212023.07FU	0/15	0/0.02
EcM	SH184560.07FU	15/0	0.02/0
EcM	SH196665.07FU	1/14	0/0.02
SAP	SH176913.07FU	5/10	0.01/0.01
SAP	SH180109.07FU	0/15	0/0.02
	SH000333.07FU	10/5	0.01/0.01
SAP	SH190265.07FU	11/4	0.01/0.01
EcM		11/4	0.01/0.01
Pathogen	SH204514.07FU	2/13	0/0.02
SAP	SH188163.07FU	1/14	0/0.02
EcM	SH184403.07FU	0/15	0/0.02
Pathogen	SH535721.07FU	8/7	0.01/0.01
	SH016219.07FU	14/1	0.02/0
SAP	SH186594.07FU	12/3	0.01/0
EcM	SH189392.07FU	0/15	0/0.02
	SH630162.07FU	13/2	0.02/0
SAP	SH466688.07FU	0/15	0/0.02
SAP	SH180109.07FU	14/1	0.02/0
	SH178370.07FU	15/0	0.02/0
	SH180187.07FU	15/0	0.02/0
	SH193764.07FU	0/15	0/0.02
Pathogen	SH530119.07FU	14/1	0.02/0
EcM	SH188859.07FU	15/0	0.02/0
SAP		15/0	0.02/0
AM	SH191193.07FU	3/12	0/0.02
EcM	SH179823.07FU	0/14	0/0.02
	SH000333.07FU	0/14	0/0.02
	SH013009.07FU	1/13	0/0.02
SAP	SH220361.07FU	0/14	0/0.02
		6/8	0.01/0.01
	SH028050.07FU	7/7	0.01/0.01
	SH005285.07FU	0/14	0/0.02
SAP	SH181879.07FU	14/0	0.02/0
EcM	SH214073.07FU	0/14	0/0.02
	SH000333.07FU	13/1	0.02/0
SAP	SH186042.07FU	0/14	0/0.02
	SH209881.07FU	14/0	0.02/0
EcM	SH181009.07FU	10/4	0.01/0.01
EcM	SH213655.07FU	14/0	0.02/0
	SH028231.07FU	0/14	0/0.02
Plant pathogen	SH020484.07FU	1/13	0/0.02
EcM	SH526355.07FU	14/0	0.02/0
SAP	SH202459.07FU	13/1	0.02/0
	SH210354.07FU	13/1	0.02/0
AM	SH521585.07FU	14/0	0.02/0
SAP	SH185066.07FU	14/0	0.02/0
	SH022181.07FU	9/5	0.01/0.01
SAP	SH014969.07FU	3/11	0/0.02
		13/1	0.02/0
EcM	SH189513.07FU	0/14	0/0.02
		0/14	0/0.02
SAP	SH187866.07FU	0/14	0/0.02
EcM	SH188469.07FU	8/6	0.01/0.01
Pathogen	SH459541.07FU	13/1	0.02/0
EcM	SH177673.07FU	8/6	0.01/0.01
	SH180757.07FU	14/0	0.02/0
SAP	SH178424.07FU	14/0	0.02/0
EcM	SH222335.07FU	0/14	0/0.02
EcM	SH177821.07FU	0/14	0/0.02
AM	SH019828.07FU	2/12	0/0.02
	SH196793.07FU	7/7	0.01/0.01
Plant pathogen	SH201106.07FU	3/11	0/0.02
EcM	SH194466.07FU	0/13	0/0.02
SAP	SH208800.07FU	0/13	0/0.02
SAP	SH185973.07FU	0/13	0/0.02
	SH216421.07FU	12/1	0.01/0
	SH022011.07FU	9/4	0.01/0.01
Plant pathogen	SH021554.07FU	13/0	0.02/0
	SH211282.07FU	13/0	0.02/0
		0/13	0/0.02
SAP	SH219460.07FU	13/0	0.02/0
EcM	SH177841.07FU	0/13	0/0.02
	SH205944.07FU	0/13	0/0.02
Pathogen	SH004974.07FU	13/0	0.02/0
	SH488691.07FU	2/11	0/0.02
EcM	SH193728.07FU	13/0	0.02/0
Pathogen	SH458414.07FU	6/7	0.01/0.01
	SH198923.07FU	10/3	0.01/0
SAP	SH178424.07FU	13/0	0.02/0
	SH198112.07FU	12/1	0.01/0
	SH205751.07FU	12/1	0.01/0
Plant pathogen	SH628560.07FU	13/0	0.02/0
	SH530097.07FU	13/0	0.02/0
	SH217522.07FU	7/6	0.01/0.01
SAP	SH178481.07FU	13/0	0.02/0
Pathogen	SH197355.07FU	11/2	0.01/0
SAP	SH202579.07FU	0/13	0/0.02
EcM	SH213657.07FU	13/0	0.02/0
SAP	SH202562.07FU	13/0	0.02/0
Plant pathogen	SH218699.07FU	13/0	0.02/0
AM	SH497462.07FU	12/1	0.01/0
SAP	SH533618.07FU	12/1	0.01/0
		0/13	0/0.02
	SH005791.07FU	12/1	0.01/0
EcM	SH184590.07FU	13/0	0.02/0
EcM	SH196706.07FU	0/13	0/0.02
	SH210135.07FU	13/0	0.02/0
EcM	SH218882.07FU	9/4	0.01/0.01
SAP	SH533618.07FU	13/0	0.02/0
		13/0	0.02/0
SAP	SH028195.07FU	0/13	0/0.02
	SH460500.07FU	13/0	0.02/0
	SH196793.07FU	1/12	0/0.02
SAP	SH018038.07FU	12/1	0.01/0
	SH010252.07FU	0/13	0/0.02
	SH631256.07FU	0/13	0/0.02
	SH032248.07FU	13/0	0.02/0
SAP	SH183333.07FU	13/0	0.02/0
AM	SH004948.07FU	13/0	0.02/0
	SH007272.07FU	13/0	0.02/0
	SH030150.07FU	12/1	0.01/0
SAP	SH221743.07FU	13/0	0.02/0
Pathogen		0/13	0/0.02
SAP	SH175416.07FU	2/11	0/0.02
Pathogen	SH020431.07FU	1/11	0/0.02
Pathogen	SH020417.07FU	0/12	0/0.02
SAP	SH196642.07FU	8/4	0.01/0.01
		2/10	0/0.01
SAP	SH213263.07FU	0/12	0/0.02
SAP	SH176632.07FU	12/0	0.01/0
Animal parasite	SH192579.07FU	0/12	0/0.02
EcM	SH201232.07FU	6/6	0.01/0.01
qqq	SH188238.07FU	8/4	0.01/0.01
	SH201723.07FU	1/11	0/0.02
SAP	SH177565.07FU	10/2	0.01/0
EcM	SH222142.07FU	12/0	0.01/0
SAP	SH205943.07FU	12/0	0.01/0
Pathogen	SH493945.07FU	8/4	0.01/0.01
	SH208947.07FU	1/11	0/0.02
SAP	SH209810.07FU	12/0	0.01/0
SAP	SH188388.07FU	0/12	0/0.02
SAP	SH185896.07FU	12/0	0.01/0
EcM	SH190469.07FU	0/12	0/0.02
SAP	SH497040.07FU	12/0	0.01/0
SAP	SH188379.07FU	0/12	0/0.02
SAP		8/4	0.01/0.01
	SH478763.07FU	11/1	0.01/0
SAP	SH220727.07FU	0/12	0/0.02
SAP	SH214278.07FU	0/12	0/0.02
Pathogen		0/12	0/0.02
SAP	SH192114.07FU	11/1	0.01/0
		1/11	0/0.02
Pathogen	SH494897.07FU	6/6	0.01/0.01
	SH495485.07FU	0/12	0/0.02
SAP	SH180109.07FU	12/0	0.01/0
	SH468459.07FU	12/0	0.01/0
SAP	SH203778.07FU	6/6	0.01/0.01
SAP	SH484969.07FU	12/0	0.01/0
		12/0	0.01/0
SAP	SH007644.07FU	12/0	0.01/0
Mycoparasite	SH182180.07FU	2/10	0/0.01
SAP	SH014393.07FU	0/12	0/0.02
SAP	SH201668.07FU	12/0	0.01/0
		1/11	0/0.02
Pathogen	SH015126.07FU	12/0	0.01/0
EcM	SH188532.07FU	9/3	0.01/0
Plant pathogen	SH184100.07FU	0/12	0/0.02
AM		12/0	0.01/0
		11/1	0.01/0
	SH463958.07FU	7/5	0.01/0.01
SAP		12/0	0.01/0
EcM	SH196824.07FU	0/12	0/0.02
Plant pathogen	SH198658.07FU	0/12	0/0.02
EcM	SH178240.07FU	0/12	0/0.02
Pathogen	SH477111.07FU	10/1	0.01/0
	SH174320.07FU	11/0	0.01/0
SAP	SH190095.07FU	11/0	0.01/0
SAP	SH001849.07FU	11/0	0.01/0
EcM	SH177788.07FU	11/0	0.01/0
EcM	SH177804.07FU	11/0	0.01/0
SAP		0/11	0/0.02
EcM	SH219860.07FU	0/11	0/0.02
Pathogen	SH176534.07FU	10/1	0.01/0
Plant pathogen	SH017855.07FU	11/0	0.01/0
	SH203280.07FU	0/11	0/0.02
SAP	SH204309.07FU	11/0	0.01/0
	SH196848.07FU	8/3	0.01/0
	SH215221.07FU	11/0	0.01/0
	SH216325.07FU	11/0	0.01/0
Plant pathogen	SH020484.07FU	11/0	0.01/0
EcM	SH204817.07FU	11/0	0.01/0
EcM	SH186849.07FU	0/11	0/0.02
	SH215928.07FU	0/11	0/0.02
SAP	SH199650.07FU	0/11	0/0.02
SAP	SH212619.07FU	2/9	0/0.01
	SH489258.07FU	10/1	0.01/0
	SH210940.07FU	0/11	0/0.02
EcM	SH188130.07FU	0/11	0/0.02
SAP	SH007215.07FU	11/0	0.01/0
SAP	SH028772.07FU	11/0	0.01/0
SAP	SH196188.07FU	11/0	0.01/0
Plant pathogen	SH523879.07FU	0/11	0/0.02
SAP	SH215110.07FU	11/0	0.01/0
EcM	SH205669.07FU	0/11	0/0.02
AM	SH029039.07FU	11/0	0.01/0
SAP	SH630292.07FU	1/10	0/0.01
EcM	SH007310.07FU	0/11	0/0.02
SAP	SH179262.07FU	0/11	0/0.02
EcM	SH219810.07FU	11/0	0.01/0
SAP	SH188377.07FU	0/11	0/0.02
EcM	SH179934.07FU	4/7	0/0.01
SAP	SH006496.07FU	11/0	0.01/0
SAP	SH196054.07FU	0/11	0/0.02
EcM	SH188506.07FU	0/11	0/0.02
EcM	SH177801.07FU	0/11	0/0.02
		10/1	0.01/0
		11/0	0.01/0
SAP	SH174239.07FU	0/11	0/0.02
Pathogen		10/1	0.01/0
	SH201191.07FU	10/1	0.01/0
SAP	SH494990.07FU	11/0	0.01/0
SAP	SH216665.07FU	10/1	0.01/0
		0/11	0/0.02
	SH198112.07FU	2/9	0/0.01
Mycoparasite		0/11	0/0.02
AM	SH017249.07FU	11/0	0.01/0
SAP	SH206507.07FU	2/9	0/0.01
	SH174397.07FU	8/3	0.01/0
	SH174320.07FU	11/0	0.01/0
EcM	SH181033.07FU	9/2	0.01/0
Mycoparasite		11/0	0.01/0
SAP	SH177063.07FU	0/11	0/0.02
		10/1	0.01/0
		11/0	0.01/0
SAP	SH006496.07FU	11/0	0.01/0
Pathogen		11/0	0.01/0
EcM	SH215190.07FU	11/0	0.01/0
SAP	SH196586.07FU	0/11	0/0.02
SAP	SH001975.07FU	0/11	0/0.02
Plant pathogen		11/0	0.01/0
Plant pathogen	SH186594.07FU	7/3	0.01/0
Pathogen	SH015126.07FU	8/2	0.01/0
Pathogen	SH458155.07FU	7/3	0.01/0
EcM	SH177880.07FU	0/10	0/0.01
	SH028575.07FU	10/0	0.01/0
SAP		10/0	0.01/0
	SH198112.07FU	0/10	0/0.01
EcM	SH186707.07FU	0/10	0/0.01
	SH015811.07FU	10/0	0.01/0
Pathogen	SH531933.07FU	10/0	0.01/0
EcM	SH197143.07FU	0/10	0/0.01
SAP	SH183633.07FU	10/0	0.01/0
Pathogen		8/2	0.01/0
SAP	SH533618.07FU	8/2	0.01/0
Mycoparasite	SH205443.07FU	5/5	0.01/0.01
EcM	SH190701.07FU	0/10	0/0.01
	SH213843.07FU	10/0	0.01/0
EcM	SH219800.07FU	10/0	0.01/0
		0/10	0/0.01
EcM	SH222334.07FU	5/5	0.01/0.01
SAP	SH188334.07FU	10/0	0.01/0
	SH216421.07FU	6/4	0.01/0.01
EcM	SH222341.07FU	2/8	0/0.01
	SH203150.07FU	0/10	0/0.01
SAP	SH185778.07FU	0/10	0/0.01
		0/10	0/0.01
	SH198555.07FU	0/10	0/0.01
Pathogen	SH204500.07FU	4/6	0/0.01
	SH192377.07FU	10/0	0.01/0
SAP	SH193236.07FU	0/10	0/0.01
SAP	SH019131.07FU	0/10	0/0.01
	SH495750.07FU	8/2	0.01/0
	SH488691.07FU	0/10	0/0.01
Pathogen	SH479099.07FU	1/9	0/0.01
	SH199606.07FU	10/0	0.01/0
EcM	SH198507.07FU	0/10	0/0.01
	SH215245.07FU	0/10	0/0.01
SAP	SH201440.07FU	7/3	0.01/0
SAP		10/0	0.01/0
SAP	SH018038.07FU	8/2	0.01/0
SAP	SH465267.07FU	10/0	0.01/0
SAP	SH217612.07FU	10/0	0.01/0
		10/0	0.01/0
SAP	SH188950.07FU	0/10	0/0.01
	SH199128.07FU	3/7	0/0.01
EcM	SH489768.07FU	0/10	0/0.01
Pathogen	SH525590.07FU	9/1	0.01/0
SAP		10/0	0.01/0
SAP	SH484969.07FU	10/0	0.01/0
Plant pathogen	SH223446.07FU	10/0	0.01/0
Animal parasite	SH204844.07FU	1/9	0/0.01
EcM	SH194536.07FU	0/10	0/0.01
AM	SH205187.07FU	10/0	0.01/0
SAP	SH202601.07FU	8/2	0.01/0
SAP	SH213395.07FU	0/10	0/0.01
EcM	SH222334.07FU	4/6	0/0.01
EcM	SH196704.07FU	0/10	0/0.01
	SH217341.07FU	10/0	0.01/0
	SH030693.07FU	10/0	0.01/0
Pathogen	SH020434.07FU	2/8	0/0.01
	SH475053.07FU	0/10	0/0.01
EcM	SH220112.07FU	0/10	0/0.01
	SH016202.07FU	10/0	0.01/0
SAP	SH027198.07FU	10/0	0.01/0
SAP	SH197530.07FU	4/6	0/0.01
EcM	SH196704.07FU	0/9	0/0.01
	SH470755.07FU	9/0	0.01/0
SAP	SH218977.07FU	0/9	0/0.01
	SH497368.07FU	1/8	0/0.01
SAP	SH021770.07FU	0/9	0/0.01
SAP	SH018038.07FU	9/0	0.01/0
SAP	SH218530.07FU	1/8	0/0.01
EcM	SH188532.07FU	2/7	0/0.01
SAP	SH190272.07FU	9/0	0.01/0
EcM	SH218582.07FU	0/9	0/0.01
	SH197016.07FU	9/0	0.01/0
SAP	SH030693.07FU	8/1	0.01/0
SAP	SH174592.07FU	9/0	0.01/0
	SH012126.07FU	9/0	0.01/0
	SH029551.07FU	9/0	0.01/0
		0/9	0/0.01
	SH023297.07FU	0/9	0/0.01
	SH204310.07FU	9/0	0.01/0
Plant pathogen	SH203161.07FU	9/0	0.01/0
	SH198655.07FU	0/9	0/0.01
	SH184176.07FU	2/7	0/0.01
	SH187296.07FU	9/0	0.01/0
	SH220343.07FU	0/9	0/0.01
Mycoparasite		8/1	0.01/0
EcM	SH184519.07FU	0/9	0/0.01
EcM	SH177811.07FU	0/9	0/0.01
SAP		9/0	0.01/0
SAP	SH190868.07FU	0/9	0/0.01
EcM	SH176299.07FU	0/9	0/0.01
Plant pathogen	SH218647.07FU	9/0	0.01/0
	SH031099.07FU	7/2	0.01/0
Pathogen		0/9	0/0.01
SAP	SH181631.07FU	8/1	0.01/0
	SH201603.07FU	6/3	0.01/0
	SH028576.07FU	9/0	0.01/0
EcM	SH488966.07FU	9/0	0.01/0
	SH528044.07FU	8/1	0.01/0
EcM	SH188532.07FU	0/9	0/0.01
	SH021536.07FU	5/4	0.01/0.01
EcM	SH189367.07FU	0/9	0/0.01
		2/7	0/0.01
SAP	SH188950.07FU	0/9	0/0.01
		9/0	0.01/0
SAP		0/9	0/0.01
	SH218109.07FU	9/0	0.01/0
SAP	SH207660.07FU	7/2	0.01/0
SAP	SH180109.07FU	9/0	0.01/0
	SH470104.07FU	7/2	0.01/0
	SH204051.07FU	9/0	0.01/0
Pathogen	SH460857.07FU	0/9	0/0.01
EcM	SH189564.07FU	0/9	0/0.01
	SH217072.07FU	9/0	0.01/0
Mycparasite	SH174883.07FU	3/6	0/0.01
	SH018740.07FU	7/2	0.01/0
EcM	SH177788.07FU	0/9	0/0.01
	SH028576.07FU	9/0	0.01/0
EcM	SH214265.07FU	0/9	0/0.01
Plant pathogen	SH471707.07FU	0/9	0/0.01
EcM	SH178758.07FU	1/8	0/0.01
EcM	SH020446.07FU	9/0	0.01/0
	SH202460.07FU	3/6	0/0.01
Pathogen	SH492696.07FU	8/1	0.01/0
	SH535260.07FU	0/9	0/0.01
	SH457042.07FU	7/2	0.01/0
SAP	SH192114.07FU	8/1	0.01/0
SAP	SH533618.07FU	9/0	0.01/0
	SH217636.07FU	2/7	0/0.01
EcM	SH188484.07FU	1/8	0/0.01
	SH461130.07FU	9/0	0.01/0
	SH183894.07FU	2/7	0/0.01
Pathogen	SH493681.07FU	9/0	0.01/0
SAP	SH197646.07FU	8/1	0.01/0
	SH462250.07FU	2/7	0/0.01
Pathogen		9/0	0.01/0
Pathogen	SH211778.07FU	0/9	0/0.01
SAP	SH186576.07FU	8/1	0.01/0
	SH459023.07FU	0/9	0/0.01
EcM	SH184547.07FU	0/9	0/0.01
EcM		0/9	0/0.01
	SH201658.07FU	9/0	0.01/0
Pathogen	SH487551.07FU	0/9	0/0.01
	SH197558.07FU	0/9	0/0.01
SAP	SH019131.07FU	0/9	0/0.01
Pathogen	SH525595.07FU	9/0	0.01/0
SAP	SH019131.07FU	0/9	0/0.01
Pathogen	SH477111.07FU	8/1	0.01/0
SAP	SH219559.07FU	8/1	0.01/0
SAP	SH196089.07FU	2/7	0/0.01
SAP	SH007215.07FU	7/2	0.01/0
AM		7/2	0.01/0
	SH002327.07FU	0/9	0/0.01
	SH475438.07FU	9/0	0.01/0
Pathogen	SH180900.07FU	0/8	0/0.01
	SH197862.07FU	8/0	0.01/0
SAP	SH202705.07FU	0/8	0/0.01
SAP	SH489260.07FU	8/0	0.01/0
SAP	SH191722.07FU	8/0	0.01/0
	SH196848.07FU	8/0	0.01/0
EcM	SH218845.07FU	8/0	0.01/0
	SH206550.07FU	7/1	0.01/0
	SH212533.07FU	8/0	0.01/0
AM	SH191191.07FU	0/8	0/0.01
EcM	SH178192.07FU	8/0	0.01/0
Pathogen	SH461018.07FU	8/0	0.01/0
AM		8/0	0.01/0
		0/8	0/0.01
		1/7	0/0.01
EcM	SH188532.07FU	0/8	0/0.01
SAP	SH220352.07FU	8/0	0.01/0
SAP	SH177454.07FU	0/8	0/0.01
SAP	SH209810.07FU	8/0	0.01/0
	SH486211.07FU	0/8	0/0.01
	SH198404.07FU	5/3	0.01/0
SAP	SH182680.07FU	5/3	0.01/0
Plant pathogen	SH201124.07FU	6/2	0.01/0
	SH480366.07FU	8/0	0.01/0
SAP	SH015527.07FU	8/0	0.01/0
SAP	SH497278.07FU	8/0	0.01/0
SAP	SH175276.07FU	7/1	0.01/0
	SH180504.07FU	8/0	0.01/0
Mycoparasite		0/8	0/0.01
	SH198112.07FU	2/6	0/0.01
Plant pathogen	SH216783.07FU	4/4	0/0.01
		2/6	0/0.01
Pathogen	SH020422.07FU	3/5	0/0.01
	SH185946.07FU	8/0	0.01/0
SAP	SH203201.07FU	2/6	0/0.01
Pathogen		8/0	0.01/0
SAP	SH175911.07FU	1/7	0/0.01
	SH465883.07FU	8/0	0.01/0
EcM	SH184539.07FU	0/8	0/0.01
	SH495005.07FU	8/0	0.01/0
Plant pathogen	SH630441.07FU	8/0	0.01/0
	SH201605.07FU	0/8	0/0.01
	SH210493.07FU	8/0	0.01/0
SAP	SH221930.07FU	0/8	0/0.01
	SH201667.07FU	0/8	0/0.01
		8/0	0.01/0
	SH531923.07FU	2/6	0/0.01
SAP	SH185329.07FU	8/0	0.01/0
SAP	SH214063.07FU	8/0	0.01/0
SAP	SH530103.07FU	0/8	0/0.01
SAP	SH182977.07FU	7/1	0.01/0
SAP	SH185976.07FU	0/8	0/0.01
Pathogen	SH176534.07FU	8/0	0.01/0
Plant pathogen	SH182797.07FU	0/8	0/0.01
SAP	SH219002.07FU	3/5	0/0.01
	SH470475.07FU	6/2	0.01/0
Pathogen	SH483362.07FU	0/8	0/0.01
	SH476404.07FU	5/3	0.01/0
	SH205944.07FU	0/8	0/0.01
SAP	SH196779.07FU	5/3	0.01/0
Mycoparasite	SH194779.07FU	8/0	0.01/0
	SH184949.07FU	8/0	0.01/0
EcM	SH186136.07FU	0/8	0/0.01
	SH181859.07FU	0/8	0/0.01
	SH212640.07FU	0/8	0/0.01
Plant pathogen	SH526346.07FU	8/0	0.01/0
		8/0	0.01/0
	SH489653.07FU	8/0	0.01/0
SAP	SH027748.07FU	0/8	0/0.01
SAP	SH186671.07FU	0/8	0/0.01
	SH029551.07FU	4/4	0/0.01
SAP	SH220361.07FU	8/0	0.01/0
SAP	SH189331.07FU	1/7	0/0.01
SAP	SH007577.07FU	0/8	0/0.01
	SH530299.07FU	2/6	0/0.01
SAP	SH201668.07FU	8/0	0.01/0
Lichenicolous	SH025144.07FU	8/0	0.01/0
Mycoparasite	SH176280.07FU	0/8	0/0.01
qqq	SH214037.07FU	5/3	0.01/0
	SH497375.07FU	8/0	0.01/0
	SH198607.07FU	4/4	0/0.01
		8/0	0.01/0
		5/3	0.01/0
Pathogen	SH525590.07FU	0/8	0/0.01
SAP	SH213130.07FU	7/1	0.01/0
	SH460500.07FU	8/0	0.01/0
Pathogen	SH015126.07FU	8/0	0.01/0
Pathogen	SH001662.07FU	1/7	0/0.01
EcM	SH201232.07FU	7/1	0.01/0
	SH212640.07FU	6/2	0.01/0
	SH470475.07FU	0/8	0/0.01
	SH017510.07FU	7/1	0.01/0
	SH205071.07FU	2/6	0/0.01
	SH194255.07FU	0/8	0/0.01
SAP	SH196093.07FU	0/8	0/0.01
SAP	SH491955.07FU	8/0	0.01/0
SAP	SH208312.07FU	0/8	0/0.01
Pathogen	SH204498.07FU	0/8	0/0.01
	SH204711.07FU	8/0	0.01/0
	SH003725.07FU	6/2	0.01/0
SAP	SH205441.07FU	0/7	0/0.01
Pathogen	SH481080.07FU	7/0	0.01/0
		0/7	0/0.01
Mycoparasite		2/5	0/0.01
	SH206778.07FU	2/5	0/0.01
Pathogen	SH197355.07FU	0/7	0/0.01
SAP	SH176909.07FU	7/0	0.01/0
SAP	SH464966.07FU	0/7	0/0.01
SAP	SH180134.07FU	7/0	0.01/0
	SH465883.07FU	3/4	0/0.01
SAP	SH196848.07FU	7/0	0.01/0
SAP	SH206963.07FU	7/0	0.01/0
	SH198117.07FU	0/7	0/0.01
EcM	SH177852.07FU	0/7	0/0.01
	SH020897.07FU	7/0	0.01/0
		3/4	0/0.01
qqq	SH465250.07FU	0/7	0/0.01
	SH208055.07FU	0/7	0/0.01
SAP	SH218627.07FU	0/7	0/0.01
	SH204309.07FU	5/2	0.01/0
SAP	SH185108.07FU	0/7	0/0.01
SAP	SH007701.07FU	0/7	0/0.01
Pathogen	SH469096.07FU	0/7	0/0.01
Plant pathogen	SH020483.07FU	7/0	0.01/0
	SH220959.07FU	7/0	0.01/0
SAP	SH478840.07FU	7/0	0.01/0
EcM	SH183754.07FU	7/0	0.01/0
SAP	SH181630.07FU	4/3	0/0
SAP	SH484969.07FU	7/0	0.01/0
EcM	SH214500.07FU	0/7	0/0.01
SAP	SH207660.07FU	6/1	0.01/0
AM	SH496699.07FU	4/3	0/0
Pathogen		7/0	0.01/0
		3/4	0/0.01
	SH197585.07FU	6/1	0.01/0
	SH220712.07FU	0/7	0/0.01
EcM	SH187177.07FU	0/7	0/0.01
AM	SH205183.07FU	7/0	0.01/0
	SH012950.07FU	2/5	0/0.01
Plant pathogen	SH181552.07FU	1/6	0/0.01
	SH463146.07FU	7/0	0.01/0
SAP	SH197585.07FU	7/0	0.01/0
	SH199606.07FU	7/0	0.01/0
EcM	SH027692.07FU	0/7	0/0.01
EcM	SH211353.07FU	0/7	0/0.01
AM		7/0	0.01/0
SAP	SH181095.07FU	0/7	0/0.01
EcM	SH027692.07FU	0/7	0/0.01
EcM	SH204543.07FU	7/0	0.01/0
SAP	SH028772.07FU	7/0	0.01/0
SAP	SH015841.07FU	5/2	0.01/0
	SH195307.07FU	7/0	0.01/0
	SH177344.07FU	6/1	0.01/0
Plant pathogen	SH192615.07FU	6/1	0.01/0
	SH208537.07FU	7/0	0.01/0
	SH201680.07FU	0/7	0/0.01
	SH182983.07FU	7/0	0.01/0
SAP	SH019131.07FU	0/7	0/0.01
AM	SH179680.07FU	7/0	0.01/0
SAP	SH530715.07FU	7/0	0.01/0
	SH000334.07FU	0/7	0/0.01
	SH018086.07FU	0/7	0/0.01
EcM	SH208386.07FU	0/7	0/0.01
	SH017501.07FU	0/7	0/0.01
	SH028576.07FU	7/0	0.01/0
	SH017734.07FU	6/1	0.01/0
	SH025106.07FU	0/7	0/0.01
	SH200319.07FU	6/1	0.01/0
	SH630957.07FU	1/6	0/0.01
SAP	SH016382.07FU	0/7	0/0.01
	SH194255.07FU	0/7	0/0.01
	SH215072.07FU	4/3	0/0
AM	SH192020.07FU	3/4	0/0.01
SAP	SH220413.07FU	2/5	0/0.01
	SH017737.07FU	1/6	0/0.01
EcM	SH184539.07FU	0/7	0/0.01
	SH631586.07FU	0/7	0/0.01
Plant pathogen	SH205225.07FU	7/0	0.01/0
	SH631256.07FU	4/3	0/0
EcM	SH214618.07FU	0/7	0/0.01
	SH495485.07FU	0/7	0/0.01
SAP	SH211884.07FU	2/5	0/0.01
SAP	SH018038.07FU	7/0	0.01/0
Plant pathogen	SH020483.07FU	7/0	0.01/0
	SH185879.07FU	6/1	0.01/0
Pathogen	SH527871.07FU	0/7	0/0.01
Plant pathogen	SH206778.07FU	0/7	0/0.01
SAP	SH477223.07FU	7/0	0.01/0
EcM	SH177880.07FU	0/7	0/0.01
	SH218119.07FU	7/0	0.01/0
	SH032388.07FU	5/2	0.01/0
AM	SH005202.07FU	7/0	0.01/0
		1/6	0/0.01
	SH000334.07FU	7/0	0.01/0
	SH188470.07FU	7/0	0.01/0
Pathogen	SH459149.07FU	7/0	0.01/0
SAP	SH203439.07FU	7/0	0.01/0
	SH215260.07FU	6/1	0.01/0
	SH465736.07FU	4/3	0/0
	SH459723.07FU	0/7	0/0.01
	SH179788.07FU	7/0	0.01/0
SAP	SH465946.07FU	3/4	0/0.01
		7/0	0.01/0
SAP	SH010273.07FU	7/0	0.01/0
EcM	SH184550.07FU	0/7	0/0.01
Pathogen	SH493681.07FU	7/0	0.01/0
Mycoparasite	SH205443.07FU	3/4	0/0.01
EcM	SH208387.07FU	0/7	0/0.01
Mycoparasite	SH181985.07FU	4/3	0/0
	SH528414.07FU	5/2	0.01/0
	SH461102.07FU	5/2	0.01/0
	SH200238.07FU	3/4	0/0.01
SAP	SH205313.07FU	4/3	0/0
SAP	SH484969.07FU	7/0	0.01/0
	SH199261.07FU	7/0	0.01/0
SAP	SH493339.07FU	7/0	0.01/0
Mycoparasite		7/0	0.01/0
SAP	SH641665.07FU	0/7	0/0.01
	SH461102.07FU	6/1	0.01/0
	SH198829.07FU	7/0	0.01/0
		0/7	0/0.01
	SH180461.07FU	7/0	0.01/0
	SH186783.07FU	7/0	0.01/0
Pathogen	SH204502.07FU	3/4	0/0.01
Plant pathogen	SH183868.07FU	6/0	0.01/0
	SH222134.07FU	2/4	0/0.01
	SH217932.07FU	6/0	0.01/0
Pathogen	SH526343.07FU	6/0	0.01/0
SAP	SH199651.07FU	6/0	0.01/0
SAP	SH177362.07FU	1/5	0/0.01
SAP	SH022888.07FU	5/1	0.01/0
Plant pathogen	SH207361.07FU	3/3	0/0
Pathogen	SH483502.07FU	6/0	0.01/0
	SH210101.07FU	6/0	0.01/0
SAP	SH219019.07FU	6/0	0.01/0
Pathogen		0/6	0/0.01
		1/5	0/0.01
	SH475543.07FU	6/0	0.01/0
		6/0	0.01/0
Mycoparasite		6/0	0.01/0
Pathogen	SH469096.07FU	0/6	0/0.01
	SH465883.07FU	6/0	0.01/0
SAP	SH202781.07FU	0/6	0/0.01
		2/4	0/0.01
		0/6	0/0.01
SAP	SH181879.07FU	0/6	0/0.01
SAP	SH018334.07FU	5/1	0.01/0
Plant pathogen	SH185437.07FU	0/6	0/0.01
SAP	SH522449.07FU	6/0	0.01/0
		0/6	0/0.01
Pathogen	SH523928.07FU	4/2	0/0
Mycoparasite	SH523696.07FU	0/6	0/0.01
EcM	SH218012.07FU	6/0	0.01/0
SAP	SH218627.07FU	3/3	0/0
Pathogen	SH472344.07FU	6/0	0.01/0
	SH460059.07FU	3/3	0/0
SAP	SH015841.07FU	4/2	0/0
	SH185879.07FU	6/0	0.01/0
EcM	SH196465.07FU	0/6	0/0.01
Animal parasite	SH192575.07FU	6/0	0.01/0
	SH182994.07FU	6/0	0.01/0
SAP	SH022684.07FU	6/0	0.01/0
SAP	SH204537.07FU	6/0	0.01/0
	SH007892.07FU	3/3	0/0
SAP	SH221168.07FU	0/6	0/0.01
	SH198116.07FU	6/0	0.01/0
	SH472400.07FU	6/0	0.01/0
EcM	SH184628.07FU	6/0	0.01/0
SAP	SH206963.07FU	5/1	0.01/0
EcM	SH188470.07FU	0/6	0/0.01
	SH030110.07FU	5/1	0.01/0
SAP	SH180109.07FU	5/1	0.01/0
Pathogen	SH493945.07FU	5/1	0.01/0
		6/0	0.01/0
	SH174320.07FU	6/0	0.01/0
	SH216421.07FU	6/0	0.01/0
	SH530097.07FU	0/6	0/0.01
	SH214279.07FU	0/6	0/0.01
SAP	SH007977.07FU	6/0	0.01/0
	SH193764.07FU	0/6	0/0.01
		0/6	0/0.01
	SH459023.07FU	3/3	0/0
	SH181859.07FU	0/6	0/0.01
	SH206507.07FU	0/6	0/0.01
EcM	SH213654.07FU	5/1	0.01/0
Plant pathogen	SH523879.07FU	0/6	0/0.01
Pathogen		5/1	0.01/0
SAP	SH222074.07FU	2/4	0/0.01
Pathogen	SH460850.07FU	2/4	0/0.01
SAP	SH211372.07FU	6/0	0.01/0
Pathogen	SH530119.07FU	6/0	0.01/0
	SH024374.07FU	3/3	0/0
SAP	SH215110.07FU	1/5	0/0.01
EcM	SH186202.07FU	6/0	0.01/0
	SH462250.07FU	6/0	0.01/0
	SH211018.07FU	4/2	0/0
	SH217341.07FU	6/0	0.01/0
SAP	SH177565.07FU	6/0	0.01/0
SAP	SH027945.07FU	6/0	0.01/0
SAP		6/0	0.01/0
	SH182978.07FU	6/0	0.01/0
Mycparasite	SH174883.07FU	6/0	0.01/0
Pathogen		5/1	0.01/0
	SH529149.07FU	0/6	0/0.01
SAP	SH196203.07FU	0/6	0/0.01
EcM	SH204543.07FU	6/0	0.01/0
SAP	SH182977.07FU	6/0	0.01/0
SAP	SH195589.07FU	0/6	0/0.01
SAP	SH187730.07FU	6/0	0.01/0
	SH215683.07FU	5/1	0.01/0
SAP	SH020389.07FU	0/6	0/0.01
SAP	SH491955.07FU	6/0	0.01/0
Pathogen		6/0	0.01/0
EcM	SH177801.07FU	6/0	0.01/0
	SH526196.07FU	0/6	0/0.01
		6/0	0.01/0
SAP	SH006496.07FU	3/3	0/0
SAP	SH496875.07FU	6/0	0.01/0
SAP	SH198828.07FU	3/3	0/0
SAP		6/0	0.01/0
	SH029898.07FU	0/6	0/0.01
	SH027885.07FU	0/6	0/0.01
	SH535260.07FU	5/1	0.01/0
	SH000332.07FU	5/1	0.01/0
SAP	SH185116.07FU	0/6	0/0.01
SAP	SH213263.07FU	0/6	0/0.01
	SH199186.07FU	6/0	0.01/0
SAP		6/0	0.01/0
	SH015840.07FU	0/6	0/0.01
SAP	SH185977.07FU	0/6	0/0.01
	SH483390.07FU	6/0	0.01/0
AM		6/0	0.01/0
		1/5	0/0.01
Pathogen	SH535721.07FU	5/1	0.01/0
SAP	SH526253.07FU	6/0	0.01/0
SAP	SH213130.07FU	6/0	0.01/0
SAP	SH196070.07FU	5/1	0.01/0
SAP	SH198290.07FU	4/2	0/0
SAP	SH215228.07FU	6/0	0.01/0
EcM	SH184539.07FU	0/6	0/0.01
	SH183329.07FU	0/6	0/0.01
EcM	SH214652.07FU	0/6	0/0.01
SAP	SH495085.07FU	0/6	0/0.01
	SH462250.07FU	1/5	0/0.01
		6/0	0.01/0
Plant pathogen	SH020484.07FU	6/0	0.01/0
		6/0	0.01/0
SAP	SH196070.07FU	0/6	0/0.01
Pathogen		0/6	0/0.01
SAP	SH219736.07FU	4/2	0/0
SAP	SH003366.07FU	6/0	0.01/0
EcM	SH184400.07FU	0/6	0/0.01
SAP	SH182976.07FU	6/0	0.01/0
SAP	SH497507.07FU	0/6	0/0.01
Pathogen	SH458414.07FU	6/0	0.01/0
	SH527544.07FU	6/0	0.01/0
	SH022621.07FU	3/3	0/0
Pathogen	SH471735.07FU	6/0	0.01/0
EcM	SH189483.07FU	4/2	0/0
SAP	SH213130.07FU	6/0	0.01/0
Plant pathogen		0/6	0/0.01
Plant pathogen	SH020483.07FU	6/0	0.01/0
	SH486211.07FU	0/6	0/0.01
	SH218644.07FU	1/5	0/0.01
		3/3	0/0
Pathogen	SH213254.07FU	6/0	0.01/0
		6/0	0.01/0
Pathogen		2/4	0/0.01
	SH470475.07FU	2/4	0/0.01
		5/1	0.01/0
EcM	SH214265.07FU	6/0	0.01/0
EcM	SH203893.07FU	0/6	0/0.01
	SH030022.07FU	6/0	0.01/0
SAP	SH190741.07FU	5/1	0.01/0
EcM	SH177812.07FU	5/1	0.01/0
	SH198996.07FU	6/0	0.01/0
SAP	SH178797.07FU	0/6	0/0.01
SAP	SH199633.07FU	0/6	0/0.01
Mycoparasite		5/1	0.01/0
		0/6	0/0.01
SAP	SH175232.07FU	6/0	0.01/0
SAP	SH197588.07FU	6/0	0.01/0
	SH495342.07FU	6/0	0.01/0
	SH211899.07FU	6/0	0.01/0
Pathogen	SH458155.07FU	4/2	0/0
SAP	SH007634.07FU	6/0	0.01/0
Pathogen		5/1	0.01/0
Pathogen	SH492696.07FU	5/1	0.01/0
SAP	SH014917.07FU	6/0	0.01/0
Pathogen		0/6	0/0.01
Pathogen	SH526343.07FU	0/6	0/0.01
SAP	SH197542.07FU	6/0	0.01/0
SAP	SH181082.07FU	0/6	0/0.01
	SH215678.07FU	2/4	0/0.01
EcM	SH177918.07FU	0/6	0/0.01
Mycparasite	SH174882.07FU	6/0	0.01/0
SAP	SH030934.07FU	6/0	0.01/0
qqq	SH018949.07FU	1/5	0/0.01
SAP	SH219735.07FU	4/1	0/0
SAP	SH009256.07FU	3/2	0/0
SAP	SH217885.07FU	5/0	0.01/0
	SH204986.07FU	0/5	0/0.01
SAP	SH196848.07FU	5/0	0.01/0
SAP	SH197533.07FU	4/1	0/0
	SH004213.07FU	0/5	0/0.01
	SH203227.07FU	0/5	0/0.01
	SH215260.07FU	2/3	0/0
	SH527544.07FU	3/2	0/0
	SH186775.07FU	5/0	0.01/0
	SH188163.07FU	0/5	0/0.01
SAP	SH028772.07FU	5/0	0.01/0
	SH182031.07FU	0/5	0/0.01
	SH203778.07FU	5/0	0.01/0
SAP	SH218627.07FU	2/3	0/0
	SH006388.07FU	5/0	0.01/0
EcM	SH214822.07FU	0/5	0/0.01
	SH210135.07FU	5/0	0.01/0
Pathogen	SH469432.07FU	1/4	0/0.01
SAP	SH177565.07FU	2/3	0/0
	SH017734.07FU	0/5	0/0.01
SAP	SH493748.07FU	5/0	0.01/0
		5/0	0.01/0
	SH220576.07FU	5/0	0.01/0
	SH015835.07FU	5/0	0.01/0
EcM	SH495489.07FU	5/0	0.01/0
SAP	SH187111.07FU	0/5	0/0.01
	SH030110.07FU	3/2	0/0
	SH211899.07FU	0/5	0/0.01
	SH459933.07FU	5/0	0.01/0
SAP	SH193939.07FU	0/5	0/0.01
SAP	SH465267.07FU	5/0	0.01/0
EcM	SH184532.07FU	0/5	0/0.01
Plant pathogen	SH011632.07FU	5/0	0.01/0
SAP	SH209464.07FU	0/5	0/0.01
EcM	SH177852.07FU	1/4	0/0.01
SAP		0/5	0/0.01
EcM	SH218422.07FU	0/5	0/0.01
	SH018520.07FU	0/5	0/0.01
	SH474766.07FU	3/2	0/0
		5/0	0.01/0
SAP	SH197646.07FU	5/0	0.01/0
		0/5	0/0.01
Pathogen	SH020424.07FU	0/5	0/0.01
SAP	SH212824.07FU	3/2	0/0
Pathogen		5/0	0.01/0
SAP	SH014917.07FU	5/0	0.01/0
		5/0	0.01/0
Plant pathogen	SH198276.07FU	5/0	0.01/0
SAP	SH524974.07FU	4/1	0/0
Pathogen	SH463391.07FU	2/3	0/0
EcM	SH204543.07FU	5/0	0.01/0
EcM	SH214265.07FU	0/5	0/0.01
	SH531923.07FU	5/0	0.01/0
	SH205943.07FU	5/0	0.01/0
		0/5	0/0.01
	SH206996.07FU	5/0	0.01/0
	SH207730.07FU	5/0	0.01/0
	SH029305.07FU	4/1	0/0
	SH468144.07FU	0/5	0/0.01
EcM	SH009323.07FU	0/5	0/0.01
SAP	SH193526.07FU	0/5	0/0.01
EcM	SH184550.07FU	0/5	0/0.01
AM	SH176085.07FU	5/0	0.01/0
EcM	SH177788.07FU	0/5	0/0.01
EcM	SH189489.07FU	0/5	0/0.01
SAP	SH175888.07FU	1/4	0/0.01
	SH000333.07FU	0/5	0/0.01
		0/5	0/0.01
		4/1	0/0
	SH012780.07FU	5/0	0.01/0
	SH198907.07FU	5/0	0.01/0
	SH197508.07FU	0/5	0/0.01
EcM	SH177801.07FU	5/0	0.01/0
		0/5	0/0.01
	SH198112.07FU	5/0	0.01/0
Plant pathogen	SH211409.07FU	0/5	0/0.01
SAP	SH468186.07FU	0/5	0/0.01
	SH012145.07FU	0/5	0/0.01
SAP	SH210998.07FU	0/5	0/0.01
SAP	SH189974.07FU	2/3	0/0
SAP	SH024175.07FU	5/0	0.01/0
		0/5	0/0.01
	SH177344.07FU	0/5	0/0.01
	SH193773.07FU	5/0	0.01/0
SAP	SH209709.07FU	5/0	0.01/0
SAP	SH214278.07FU	0/5	0/0.01
Pathogen	SH001469.07FU	4/1	0/0
Pathogen	SH020432.07FU	5/0	0.01/0
Pathogen	SH469432.07FU	4/1	0/0
		5/0	0.01/0
		5/0	0.01/0
Pathogen	SH020422.07FU	1/4	0/0.01
	SH480366.07FU	0/5	0/0.01
	SH010490.07FU	5/0	0.01/0
SAP	SH189943.07FU	0/5	0/0.01
EcM	SH024769.07FU	5/0	0.01/0
	SH480366.07FU	4/1	0/0
	SH023587.07FU	0/5	0/0.01
SAP	SH185809.07FU	4/1	0/0
EcM	SH196058.07FU	0/5	0/0.01
EcM	SH218845.07FU	5/0	0.01/0
Pathogen	SH459541.07FU	1/4	0/0.01
	SH219607.07FU	0/5	0/0.01
SAP	SH199402.07FU	0/5	0/0.01
	SH202355.07FU	5/0	0.01/0
SAP	SH024117.07FU	0/5	0/0.01
	SH463132.07FU	5/0	0.01/0
Pathogen		0/5	0/0.01
SAP	SH181579.07FU	0/5	0/0.01
Pathogen	SH020434.07FU	1/4	0/0.01
AM	SH003661.07FU	5/0	0.01/0
SAP	SH187866.07FU	4/1	0/0
	SH533940.07FU	5/0	0.01/0
		1/4	0/0.01
Plant pathogen	SH029030.07FU	0/5	0/0.01
AM	SH175575.07FU	5/0	0.01/0
AM	SH476131.07FU	0/5	0/0.01
	SH201667.07FU	4/1	0/0
	SH488691.07FU	0/5	0/0.01
		5/0	0.01/0
Plant pathogen	SH526346.07FU	0/5	0/0.01
	SH185743.07FU	5/0	0.01/0
SAP	SH210131.07FU	5/0	0.01/0
SAP	SH216099.07FU	4/1	0/0
EcM	SH189362.07FU	0/5	0/0.01
Mycoparasite	SH628832.07FU	2/3	0/0
EcM	SH189351.07FU	2/3	0/0
		3/2	0/0
EcM	SH204370.07FU	4/1	0/0
	SH210367.07FU	5/0	0.01/0
SAP	SH221773.07FU	5/0	0.01/0
		5/0	0.01/0
Plant pathogen	SH214042.07FU	3/2	0/0
	SH524670.07FU	5/0	0.01/0
SAP	SH525516.07FU	5/0	0.01/0
	SH009219.07FU	0/5	0/0.01
EcM	SH189337.07FU	0/5	0/0.01
SAP		5/0	0.01/0
EcM	SH027692.07FU	0/5	0/0.01
	SH205751.07FU	0/5	0/0.01
		0/5	0/0.01
Pathogen	SH466317.07FU	5/0	0.01/0
	SH497108.07FU	0/5	0/0.01
SAP	SH181101.07FU	0/5	0/0.01
SAP	SH182065.07FU	0/5	0/0.01
SAP		0/5	0/0.01
	SH220576.07FU	0/5	0/0.01
		4/1	0/0
Plant pathogen	SH188970.07FU	5/0	0.01/0
SAP	SH177588.07FU	5/0	0.01/0
SAP	SH186585.07FU	2/3	0/0
EcM	SH177804.07FU	0/5	0/0.01
	SH460500.07FU	5/0	0.01/0
SAP	SH489260.07FU	5/0	0.01/0
Pathogen	SH462390.07FU	0/5	0/0.01
SAP	SH212081.07FU	3/2	0/0
	SH192278.07FU	0/5	0/0.01
	SH193765.07FU	5/0	0.01/0
	SH219996.07FU	0/5	0/0.01
SAP	SH201668.07FU	5/0	0.01/0
	SH183329.07FU	0/5	0/0.01
qqq	SH194818.07FU	4/1	0/0
	SH213615.07FU	1/4	0/0.01
AM	SH001017.07FU	5/0	0.01/0
Animal parasite	SH184949.07FU	0/5	0/0.01
	SH488280.07FU	3/2	0/0
	SH193764.07FU	4/1	0/0
	SH020005.07FU	0/5	0/0.01
SAP	SH192772.07FU	5/0	0.01/0
Plant pathogen	SH201604.07FU	0/5	0/0.01
SAP	SH207660.07FU	4/1	0/0
Pathogen	SH481080.07FU	5/0	0.01/0
	SH199217.07FU	4/1	0/0
	SH198115.07FU	1/4	0/0.01
Pathogen	SH020057.07FU	5/0	0.01/0
SAP	SH196068.07FU	5/0	0.01/0
	SH005882.07FU	5/0	0.01/0
	SH215245.07FU	0/5	0/0.01
	SH175271.07FU	3/2	0/0
	SH530287.07FU	3/2	0/0
AM	SH179682.07FU	5/0	0.01/0
AM	SH208987.07FU	5/0	0.01/0
		0/5	0/0.01
	SH016202.07FU	3/2	0/0
		0/5	0/0.01
		0/5	0/0.01
SAP		0/5	0/0.01
	SH024990.07FU	5/0	0.01/0
AM	SH488453.07FU	0/5	0/0.01
Plant pathogen	SH188972.07FU	3/2	0/0
Pathogen		5/0	0.01/0
Plant pathogen		0/5	0/0.01
Pathogen	SH477111.07FU	5/0	0.01/0
SAP	SH219002.07FU	4/1	0/0
		5/0	0.01/0
	SH030693.07FU	0/5	0/0.01
	SH032248.07FU	0/5	0/0.01
	SH015840.07FU	5/0	0.01/0
SAP	SH206507.07FU	0/5	0/0.01
	SH207007.07FU	5/0	0.01/0
SAP	SH175007.07FU	5/0	0.01/0
SAP	SH478599.07FU	0/5	0/0.01
EcM	SH189427.07FU	0/5	0/0.01
SAP	SH186350.07FU	1/4	0/0.01
SAP	SH464609.07FU	0/5	0/0.01
		1/4	0/0.01
EcM	SH187558.07FU	0/5	0/0.01
Pathogen		0/5	0/0.01
AM	SH001026.07FU	5/0	0.01/0
Mycoparasite		0/5	0/0.01
EcM	SH178240.07FU	0/4	0/0.01
	SH030036.07FU	4/0	0/0
EcM		0/4	0/0.01
SAP	SH491068.07FU	0/4	0/0.01
EcM	SH190331.07FU	0/4	0/0.01
	SH630162.07FU	4/0	0/0
EcM	SH218048.07FU	0/4	0/0.01
Pathogen	SH204497.07FU	4/0	0/0
AM	SH019830.07FU	0/4	0/0.01
	SH175276.07FU	2/2	0/0
SAP	SH182099.07FU	4/0	0/0
Pathogen	SH525579.07FU	4/0	0/0
		0/4	0/0.01
Pathogen	SH525595.07FU	4/0	0/0
SAP	SH209831.07FU	0/4	0/0.01
Pathogen	SH465932.07FU	4/0	0/0
Pathogen	SH019985.07FU	0/4	0/0.01
Pathogen		4/0	0/0
EcM	SH177788.07FU	0/4	0/0.01
SAP	SH496348.07FU	0/4	0/0.01
		4/0	0/0
Pathogen	SH020418.07FU	0/4	0/0.01
SAP	SH492582.07FU	4/0	0/0
	SH030110.07FU	4/0	0/0
EcM	SH188499.07FU	1/3	0/0
SAP	SH011256.07FU	0/4	0/0.01
Pathogen	SH531933.07FU	4/0	0/0
	SH215909.07FU	0/4	0/0.01
	SH199128.07FU	0/4	0/0.01
Pathogen	SH477111.07FU	4/0	0/0
SAP	SH491750.07FU	0/4	0/0.01
SAP	SH021623.07FU	4/0	0/0
SAP	SH181581.07FU	2/2	0/0
Pathogen	SH015292.07FU	0/4	0/0.01
[truncated: 1,456 more rows]
