# Supplementary material for: Soil mycobiomes in native European aspen forests and hybrid aspen plantations have a similar fungal richness but different compositions, mainly driven by edaphic and floristic factors
Source: Front Microbiol. 2024 May 7;15:1372938. doi: 10.3389/fmicb.2024.1372938 (PMC11106484; doi:10.3389/fmicb.2024.1372938)
Supplement: Supplementary Table S2 — Variations in fungal genera in forest and plantation. [file Table_2.xlsx]

## Sheet: residuals_site
Genus	P-value	r.squared	Estimated marginal means forest	Estimated marginal means pantation	EcM exploration type	EcM lineage/lifestyle
Amanita.Pr..F.	0.0433518	0.105778	0.00912226	1.70416e-05	MDS	amanita
Anthopsis.Pr..F.	0.000783266	0.265758	0.02427	0.00951258		saprotroph
Apodus.Pr..F.	0.00122369	0.24896	0.0068184	0.0192904		saprotroph
Armillaria.Pr..F.	0.0316848	0.118756	0.001546	2.98722e-05		saprotroph
Articulospora.Pr..F.	0.000171423	0.320684	0.00130126	1.79819e-05		saprotroph
Ascobolus.Pr..F.	0.000108144	0.336632	0.00133503	0.0241834		saprotroph
Atractospora.Pr..F.	0.0158148	0.111801	6.70849e-05	-4.06576e-20		saprotroph
Bartalinia.Pr..F.	0.0374813	0.257705	2.3813e-05	0.00022941		saprotroph
Betamyces.Pr..F.	0.00097101	0.135256	2.14211e-05	0.000460507		saprotroph
Boeremia.Pr..F.	0.0212569	0.256239	1.13381e-05	0.000205697		plant pathogen
Cadophora.Pr..F.	0.00100957	0.18244	0.0123184	0.0246626	SD	meliniomyces
Carcinomyces.Pr..F.	0.00668903	0.175644	0.000622797	6.85166e-05		mycoparasite
Cenococcum.Pr..F.	0.00791643	0.125504	0.0435026	0.00958569	SD	cenococcum
Cephalotheca.Pr..F.	0.0269172	0.191535	0.00026881	1.0842e-19		saprotroph
Chrysosporium.Pr..F.	0.0053322	0.112397	-8.68056e-20	0.000169099		saprotroph
Ciliolarina.Pr..F.	0.00814915	0.174472	9.75364e-05	-1.35525e-20		saprotroph
Cladophialophora.Pr..F.	0.000103597	0.338102	0.000390017	5.42101e-20		saprotroph
Cladosporium.Pr..F.	0.0476263	0.101887	0.000986345	0.00224579		saprotroph
Claussenomyces.Pr..F.	0.0369452	0.0143438	6.14165e-05	-1.35525e-20		saprotroph
Clavulinopsis.Pr..F.	0.00609401	0.0453096	0.000890331	-8.67362e-19		saprotroph
Clitopilus.Pr..F.	0.0337097	0.116192	0.000238494	0.0013259		saprotroph
Cryptococcus.Pr..F.	0.00421858	0.200869	0.00040598	2.16638e-05		saprotroph
Cylindrotrichum.Pr..F.	0.0403569	0.108741	1.25134e-05	0.000438225		saprotroph
Cystobasidium.Pr..F.	0.0073997	0.178371	-3.47223e-20	0.000146707		mycoparasite
Dactylella.Pr..F.	0.00125206	0.24809	3.00417e-05	0.000451269		saprotroph
Dactylellina.Pr..F.	0.0425239	0.106576	0.000137988	1.0842e-19		saprotroph
Delicatula.Pr..F.	0.0315949	0.118874	0.0017277	5.22102e-05		saprotroph
Dioszegia.Pr..F.	0.0495479	0.100252	5.46539e-05	0.000417886		saprotroph
Diversispora.Pr..F.	0.0260954	0.126786	-8.68056e-20	0.000192272		AM
Dominikia.Pr..F.	0.00464947	0.197002	-1.73611e-19	0.000439687		AM
Drechslera.Pr..F.	0.0334875	0.116466	-2.77778e-19	0.000871532		plant pathogen
Entocybe.Pr..F.	0.0179837	0.142146	7.72292e-05	-2.7105e-20		saprotroph
Entrophospora.Pr..F.	0.0407947	0.108294	-1.73611e-20	0.000203978		AM
Fusarium.Pr..F.	0.000807294	0.26463	0.00246262	0.00977641		plant pathogen
Ganoderma.Pr..F.	0.00119342	0.249911	0.00879335	0.00218794		plant pathogen/(saprotroph)
Genabea.Pr..F.	0.0342755	0.115503	-1.21528e-19	0.000239629	SD	genea-humaria
Genea.Pr..F.	0.0108549	0.162828	0.000131557	0	SD	genea-humaria
Gliomastix.Pr..F.	0.013273	0.154614	0.000345452	5.73013e-05		saprotroph
Glomus.Pr..F.	0.0013313	0.245754	3.02469e-05	0.000334609		AM
Hazslinszkyomyces.Pr..F.	0.0238181	0.130559	0.000437902	9.08111e-05		unknown
Hebeloma.Pr..F.	0.000266747	0.305067	0.00212525	0.014997	SD	hebeloma-alnicola
Helicoma.Pr..F.	0.00533385	0.191523	0.000173208	0.00050749		saprotroph
Herpotrichia.Pr..F.	0.0052269	0.192333	4.62383e-05	0.000184853		saprotroph
Heterobasidion.Pr..F.	0.0301524	0.120808	0.000160221	2.54899e-05		plant pathogen
Humaria.Pr..F.	0.00110588	0.252798	0.00472356	-8.67362e-19	SD	genea-humaria
Humicola.Pr..F.	0.00866728	0.171975	2.87227e-05	0.0012216		saprotroph
Hyaloscypha.Pr..F.	0.00133861	0.245545	0.00102561	0.000119374		saprotroph
Hydnotrya.Pr..F.	0.0195394	0.138729	7.58827e-05	0	C	hydnotrya
Hydnum.Pr..F.	0.0125338	0.156958	0.000298327	2.29253e-05	MDS	cantharellus
Hydropus.Pr..F.	0.0405295	0.108564	0.00179836	-1.0842e-18		saprotroph
Hymenogaster.Pr..F.	0.00235285	0.223821	0.000642143	0.0167671	SD	hebeloma-alnicola
Hyphodontia.Pr..F.	0.000405142	0.290027	4.23596e-05	0.000663666		saprotroph
Hyphodontiella.Pr..F.	0.0299613	0.121071	0.00452254	8.12876e-06		saprotroph
Hypochnicium.Pr..F.	0.035807	0.113693	0.00017258	-5.42101e-20		saprotroph
Hypoxylon.Pr..F.	0.0115626	0.160252	0.000235091	6.70981e-05		saprotroph
Ilyonectria.Pr..F.	0.0305446	0.120273	0.00712068	0.0109894		plant pathogen
Lactarius.Pr..F.	0.000727545	0.268507	0.00835093	0.00115371	C/MDS	russula-lactarius
Lecanicillium.Pr..F.	0.0424858	0.106613	-6.94445e-20	0.000202391		animal parasite
Leohumicola.Pr..F.	0.0114424	0.160679	8.71195e-05	0.000383113		saprotroph
Leptodiscella.Pr..F.	0.000288227	0.3023	-1.73611e-19	0.000447277		saprotroph
Leptosphaeria.Pr..F.	0.0457724	0.103529	-1.38889e-19	0.00109197		plant pathogen
Lophiostoma.Pr..F.	0.00689546	0.181217	5.25089e-05	0.000820732		saprotroph
Mallocybe.Pr..F.	0.0393074	0.109831	7.7269e-05	0.00063913	SD (C/MDF)	inocybe
Massarina.Pr..F.	0.0246539	0.129134	2.0723e-05	0.000611181		saprotroph
Meliniomyces.Pr..F.	0.000846578	0.262853	0.00505074	0.000176819		saprotroph/ECM
Membranomyces.Pr..F.	0.0101468	0.165575	0.00258972	-8.67362e-19	C	clavulina
Microdochium.Pr..F.	0.00662424	0.182832	-4.34028e-20	0.000115629		plant pathogen
Mrakia.Pr..F.	0.0040369	0.202615	5.20564e-05	0.000559856		saprotroph
Mrakiella.Pr..F.	0.0193937	0.139038	9.91178e-06	0.000169948		saprotroph
Mucor.Pr..F.	0.0195174	0.138776	0.000721203	0.00196165		saprotroph
Myrmecridium.Pr..F.	0.00140962	0.243574	1.13381e-05	0.000356149		saprotroph
Nemania.Pr..F.	0.00729376	0.178953	0.000180973	1.49454e-05		saprotroph
Neonectria.Pr..F.	0.0295164	0.12169	0.00116416	0.00250457		plant pathogen
Ochroconis.Pr..F.	0.0497816	0.100057	0.000100918	0.000442875		saprotroph
Odontia.Pr..F.	0.0193097	0.139216	2.62698e-05	0.000168179		saprotroph
Olpidium.Pr..F.	0.0113977	0.160839	3.47223e-20	0.000221024		plant pathogen
Operculomyces.Pr..F.	0.000171247	0.32072	0.000278709	0.00278157		saprotroph
Penicillium.Pr..F.	0.0427917	0.106316	0.00390034	0.000417935		saprotroph
Phialocephala.Pr..F.	0.002474	0.221866	0.0018699	0.000464461		saprotroph
Pholiota.Pr..F.	0.0124544	0.157218	0.000878284	0.000103375		saprotroph
Phoma.Pr..F.	0.00041623	0.289046	0.000330149	0.00364941		plant pathogen
Podospora.Pr..F.	0.00583399	0.187935	-1.04167e-19	0.000537243		saprotroph
Preussia.Pr..F.	0.00075988	0.266888	0.000630185	0.00657938		saprotroph
Protoglossum.Pr..F.	0.00239726	0.223093	0.000246776	0.0047054	MDF(SD)	hebeloma-alnicola
Pseudogymnoascus.Pr..F.	0.0450942	0.104147	0.00220111	0.000835696		saprotroph
Pulvinula.Pr..F.	0.0348156	0.114855	-5.55556e-19	0.00207093	SD	pulvinula
Pustularia.Pr..F.	0.0160261	0.146885	-5.55556e-19	0.000908018	SD	pustularia
Ramariopsis.Pr..F.	0.0370631	0.112265	0.000143056	-2.7105e-20		saprotroph
Rhizidium.Pr..F.	0.0346413	0.115063	0.000134954	-5.42101e-20		plant pathogen
Rhizophagus.Pr..F.	0.0451491	0.104097	-4.34028e-20	0.000102009		AM
Rhodotorula.Pr..F.	0.0239731	0.130291	7.73072e-05	0.000332373		saprotroph
Rhynchosporium.Pr..F.	0.0468793	0.102541	-8.68056e-20	0.000112356		plant pathogen
Rutstroemia.Pr..F.	0.0346589	0.115042	5.47569e-05	-1.35525e-20		saprotroph
Saitozyma.Pr..F.	0.000242286	0.30849	0.0534042	0.0156093		saprotroph
Sanchytrium.Pr..F.	0.01318	0.154901	0.00367831	0.00178524		plant pathogen
Schizothecium.Pr..F.	0.000363138	0.293992	7.11569e-05	0.00169168		saprotroph
Schwanniomyces.Pr..F.	0.0473992	0.102085	-1.04167e-19	0.000154895		saprotroph
Scutellospora.Pr..F.	0.0260277	0.126893	-3.90625e-20	6.70553e-05		AM
Sebacina.Pr..F.	0.00154468	0.240073	0.0171086	0.00101164	SD	sebacina
Septoriella.Pr..F.	0.00758321	0.177382	1.16005e-05	0.000178867		saprotroph
Siepmannia.Pr..F.	0.00625115	0.185163	0.00012838	-2.7105e-20		saprotroph
Solicoccozyma.Pr..F.	0.0111556	0.161714	0.0338338	0.0158293		unknown
Spadicoides.Pr..F.	0.000167844	0.321422	0.000334661	-1.6263e-19		saprotroph
Spizellomyces.Pr..F.	0.00114487	0.251486	1.41217e-05	0.00141574		plant pathogen
Stilbella.Pr..F.	0.003794	0.205072	0.000578127	3.99982e-05		saprotroph
Tetracladium.Pr..F.	0.0408341	0.108254	-2.60417e-20	0.000107615		saprotroph
Thelephora.Pr..F.	0.00863532	0.172125	0.00168973	9.81552e-05	SD/MDS	tomentella-thelephora
Tilletiaria.Pr..F.	0.0150212	0.149543	0	0.000235104		plant pathogen
Trichoderma.Pr..F.	0.0215115	0.134764	0.0130388	0.000555324		saprotroph
Tuber.Pr..F.	0.00175735	0.235118	0.000721332	0.00613733	SD (C)	tuber-helvella
Typhula.Pr..F.	0.0236398	0.13087	0.000118038	7.47272e-06		saprotroph
Umbelopsis.Pr..F.	0.0040613	0.202376	0.0320046	0.000446966		saprotroph
Valsa.Pr..F.	0.0245804	0.129258	3.76304e-05	0.000188044		plant pathogen
Venturia.Pr..F.	0.000259254	0.306082	0.000658831	9.56643e-05		plant pathogen
Table. Data of fungal genera that varied significantly by residual richness between plantation and forest. P-value and r2 shows difference and its magnitude between plantation and forest in particular genera. Exploration type abbrevations: SD:short-distance, C-contact type, MDF-medium distance fringe, MDS-medium distance smooth, LD-long distance type.

## Sheet: residuals_site_EcM
Genus	P-value	r.squared	Estimated marginal means forest	Estimated marginal means pantation	EcM exploration type	EcM lineage	higher mean	successional type
Amanita	0.0433518	0.105778	0.00912226	1.70416e-05	MDS	amanita	forest	late-successional
Mallocybe	0.0393074	0.109831	7.7269e-05	0.00063913	SD	inocybe	plantation	early-successional
Pulvinula	0.0348156	0.114855	-5.55556e-19	0.00207093	SD	pulvinula	plantation
Genabea	0.0342755	0.115503	-1.21528e-19	0.000239629	SD	genea-humaria	plantation
Cenococcum	0.00791643	0.125504	0.0435026	0.00958569	SD	cenococcum	forest	early-successional
Hydnotrya	0.0195394	0.138729	7.58827e-05	0	C	hydnotrya	forest
Pustularia	0.0160261	0.146885	-5.55556e-19	0.000908018	SD	pustularia	plantation
Hydnum	0.0125338	0.156958	0.000298327	2.29253e-05	MDS	cantharellus	forest
Genea	0.0108549	0.162828	0.000131557	0	SD	genea-humaria	forest
Membranomyces	0.0101468	0.165575	0.00258972	-8.67362e-19	C	clavulina	forest
Thelephora	0.00863532	0.172125	0.00168973	9.81552e-05	MDS	tomentella-thelephora	forest	early-successional
Cadophora	0.00100957	0.18244	0.0123184	0.0246626	SD	meliniomyces	plantation
Protoglossum	0.00239726	0.223093	0.000246776	0.0047054	NA	hebeloma-alnicola	plantation
Hymenogaster	0.00235285	0.223821	0.000642143	0.0167671	SD	hebeloma-alnicola	plantation
Tuber	0.00175735	0.235118	0.000721332	0.00613733	SD	tuber-helvella	plantation
Sebacina	0.00154468	0.240073	0.0171086	0.00101164	SD	sebacina	forest
Humaria	0.00110588	0.252798	0.00472356	-8.67362e-19	SD	genea-humaria	forest
Lactarius	0.000727545	0.268507	0.00835093	0.00115371	C	russula-lactarius	forest	late-successional
Hebeloma	<0.001	0.305067	0.00212525	0.014997	SD	hebeloma-alnicola	plantation

## Sheet: abundance_site
Genus	P-value	r-squared	Estimated marginal means forest	Estimated marginal means pantation	EcM exploration type	EcM lineage/lifestyle
Amanita	0.0433518	0.105778	0.00912226	1.70416e-05	C/SD/MDS	amanita
Anthopsis	0.000783266	0.265758	0.02427	0.00951258		saprotroph
Apodus	0.00122369	0.24896	0.0068184	0.0192904		saprotroph
Armillaria	0.0316848	0.118756	0.001546	2.98722e-05		saprotroph
Articulospora	0.000171423	0.320684	0.00130126	1.79819e-05		saprotroph
Ascobolus	0.000108144	0.336632	0.00133503	0.0241834		saprotroph
Atractospora	0.0158148	0.111801	6.70849e-05	-4.06576e-20		saprotroph
Bartalinia	0.0374813	0.257705	2.3813e-05	0.00022941		saprotroph
Betamyces	0.00097101	0.135256	2.14211e-05	0.000460507		saprotroph
Boeremia	0.0212569	0.256239	1.13381e-05	0.000205697		plant pathogen
Cadophora	0.00100957	0.18244	0.0123184	0.0246626	SD	meliniomyces
Carcinomyces	0.00668903	0.175644	0.000622797	6.85166e-05		mycoparasite
Cenococcum	0.00791643	0.125504	0.0435026	0.00958569	SD	cenococcum
Cephalotheca	0.0269172	0.191535	0.00026881	1.0842e-19		saprotroph
Chrysosporium	0.0053322	0.112397	-8.68056e-20	0.000169099		saprotroph
Ciliolarina	0.00814915	0.174472	9.75364e-05	-1.35525e-20		saprotroph
Cladophialophora	0.000103597	0.338102	0.000390017	5.42101e-20		saprotroph
Cladosporium	0.0476263	0.101887	0.000986345	0.00224579		saprotroph
Claussenomyces	0.0369452	0.112397	6.14165e-05	-1.35525e-20		saprotroph
Clavulinopsis	0.00609401	3.376e-05	0.000890331	-8.67362e-19		saprotroph
Clitopilus	0.0337097	0.116192	0.000238494	0.0013259		saprotroph
Cryptococcus	0.00421858	0.200869	0.00040598	2.16638e-05		saprotroph
Cylindrotrichum	0.0403569	0.108741	1.25134e-05	0.000438225		saprotroph
Cystobasidium	0.0073997	0.178371	-3.47223e-20	0.000146707		mycoparasite
Dactylella	0.00125206	0.24809	3.00417e-05	0.000451269		saprotroph
Dactylellina	0.0425239	0.106576	0.000137988	1.0842e-19		saprotroph
Delicatula	0.0315949	0.118874	0.0017277	5.22102e-05		saprotroph
Dioszegia	0.0495479	0.100252	5.46539e-05	0.000417886		saprotroph
Diversispora	0.0260954	0.126786	-8.68056e-20	0.000192272		AM
Dominikia	0.00464947	0.197002	-1.73611e-19	0.000439687		AM
Drechslera	0.0334875	0.116466	-2.77778e-19	0.000871532		plant pathogen
Entocybe	0.0179837	0.142146	7.72292e-05	-2.7105e-20		saprotroph
Entrophospora	0.0407947	0.108294	-1.73611e-20	0.000203978		AM
Fusarium	0.000807294	0.26463	0.00246262	0.00977641		plant pathogen
Ganoderma	0.00119342	0.249911	0.00879335	0.00218794		plant pathogen
Genabea	0.0342755	0.115503	-1.21528e-19	0.000239629	SD	genea-humaria
Genea	0.0108549	0.162828	0.000131557	0	SD	genea-humaria
Gliomastix	0.013273	0.154614	0.000345452	5.73013e-05		saprotroph
Glomus	0.0013313	0.245754	3.02469e-05	0.000334609		AM
Hazslinszkyomyces	0.0238181	0.130559	0.000437902	9.08111e-05		unknown
Hebeloma	0.000266747	0.305067	0.00212525	0.014997	SD/MDF:	hebeloma-alnicola
Helicoma	0.00533385	0.191523	0.000173208	0.00050749		saprotroph
Herpotrichia	0.0052269	0.192333	4.62383e-05	0.000184853		saprotroph
Heterobasidion	0.0301524	0.120808	0.000160221	2.54899e-05		plant pathogen
Humaria	0.00110588	0.252798	0.00472356	-8.67362e-19	SD	genea-humaria
Humicola	0.00866728	0.171975	2.87227e-05	0.0012216		saprotroph
Hyaloscypha	0.00133861	0.245545	0.00102561	0.000119374		saprotroph
Hydnotrya	0.0195394	0.138729	7.58827e-05	0	C	hydnotrya
Hydnum	0.0125338	0.156958	0.000298327	2.29253e-05	MDS	cantharellus
Hydropus	0.0405295	0.108564	0.00179836	-1.0842e-18		saprotroph
Hymenogaster	0.00235285	0.223821	0.000642143	0.0167671	SD	hebeloma-alnicola
Hyphodontia	0.000405142	0.290027	4.23596e-05	0.000663666		saprotroph
Hyphodontiella	0.0299613	0.121071	0.00452254	8.12876e-06		saprotroph
Hypochnicium	0.035807	0.113693	0.00017258	-5.42101e-20		saprotroph
Hypoxylon	0.0115626	0.160252	0.000235091	6.70981e-05		saprotroph
Ilyonectria	0.0305446	0.120273	0.00712068	0.0109894		plant pathogen
Lactarius	0.000727545	0.268507	0.00835093	0.00115371	C/MDS	russula-lactarius
Lecanicillium	0.0424858	0.106613	-6.94445e-20	0.000202391		animal parasite
Leohumicola	0.0114424	0.160679	8.71195e-05	0.000383113		saprotroph
Leptodiscella	0.000288227	0.3023	-1.73611e-19	0.000447277		saprotroph
Leptosphaeria	0.0457724	0.103529	-1.38889e-19	0.00109197		plant pathogen
Lophiostoma	0.00689546	0.181217	5.25089e-05	0.000820732		saprotroph
Mallocybe	0.0393074	0.109831	7.7269e-05	0.00063913	SD (C/MDF)	inocybe
Massarina	0.0246539	0.129134	2.0723e-05	0.000611181		saprotroph
Meliniomyces	0.000846578	0.262853	0.00505074	0.000176819		saprotroph/ECM
Membranomyces	0.0101468	0.165575	0.00258972	-8.67362e-19	C	clavulina
Microdochium	0.00662424	0.182832	-4.34028e-20	0.000115629		plant pathogen
Mrakia	0.0040369	0.202615	5.20564e-05	0.000559856		saprotroph
Mrakiella	0.0193937	0.139038	9.91178e-06	0.000169948		saprotroph
Mucor	0.0195174	0.138776	0.000721203	0.00196165		saprotroph
Myrmecridium	0.00140962	0.243574	1.13381e-05	0.000356149		saprotroph
Nemania	0.00729376	0.178953	0.000180973	1.49454e-05		saprotroph
Neonectria	0.0295164	0.12169	0.00116416	0.00250457		plant pathogen
Ochroconis	0.0497816	0.100057	0.000100918	0.000442875		saprotroph
Odontia	0.0193097	0.139216	2.62698e-05	0.000168179		saprotroph
Olpidium	0.0113977	0.160839	3.47223e-20	0.000221024		plant pathogen
Operculomyces	0.000171247	0.32072	0.000278709	0.00278157		saprotroph
Penicillium	0.0427917	0.106316	0.00390034	0.000417935		saprotroph
Phialocephala	0.002474	0.221866	0.0018699	0.000464461		saprotroph
Pholiota	0.0124544	0.157218	0.000878284	0.000103375		saprotroph
Phoma	0.00041623	0.289046	0.000330149	0.00364941		plant pathogen
Podospora	0.00583399	0.187935	-1.04167e-19	0.000537243		saprotroph
Preussia	0.00075988	0.266888	0.000630185	0.00657938		saprotroph
Protoglossum	0.00239726	0.223093	0.000246776	0.0047054	MDF(SD)	hebeloma-alnicola
Pseudogymnoascus	0.0450942	0.104147	0.00220111	0.000835696		saprotroph
Pulvinula	0.0348156	0.114855	-5.55556e-19	0.00207093	SD	pulvinula
Pustularia	0.0160261	0.146885	-5.55556e-19	0.000908018	SD	pustularia
Ramariopsis	0.0370631	0.112265	0.000143056	-2.7105e-20		saprotroph
Rhizidium	0.0346413	0.115063	0.000134954	-5.42101e-20		plant pathogen
Rhizophagus	0.0451491	0.104097	-4.34028e-20	0.000102009		AM
Rhodotorula	0.0239731	0.130291	7.73072e-05	0.000332373		saprotroph
Rhynchosporium	0.0468793	0.102541	-8.68056e-20	0.000112356		plant pathogen
Rutstroemia	0.0346589	0.115042	5.47569e-05	-1.35525e-20		saprotroph
Saitozyma	0.000242286	0.30849	0.0534042	0.0156093		saprotroph
Sanchytrium	0.01318	0.154901	0.00367831	0.00178524		plant pathogen
Schizothecium	0.000363138	0.293992	7.11569e-05	0.00169168		saprotroph
Schwanniomyces	0.0473992	0.102085	-1.04167e-19	0.000154895		saprotroph
Scutellospora	0.0260277	0.126893	-3.90625e-20	6.70553e-05		AM
Sebacina	0.00154468	0.240073	0.0171086	0.00101164	SD	sebacina
Septoriella	0.00758321	0.177382	1.16005e-05	0.000178867		saprotroph
Siepmannia	0.00625115	0.185163	0.00012838	-2.7105e-20		saprotroph
Solicoccozyma	0.0111556	0.161714	0.0338338	0.0158293		unknown
Spadicoides	0.000167844	0.321422	0.000334661	-1.6263e-19		saprotroph
Spizellomyces	0.00114487	0.251486	1.41217e-05	0.00141574		plant pathogen
Stilbella	0.003794	0.205072	0.000578127	3.99982e-05		saprotroph
Tetracladium	0.0408341	0.108254	-2.60417e-20	0.000107615		saprotroph
Thelephora	0.00863532	0.172125	0.00168973	9.81552e-05	SD/MDS	tomentella-thelephora
Tilletiaria	0.0150212	0.149543	0	0.000235104		plant pathogen
Trichoderma	0.0215115	0.134764	0.0130388	0.000555324		saprotroph
Tuber	0.00175735	0.235118	0.000721332	0.00613733	SD (C)	tuber-helvella
Typhula	0.0236398	0.13087	0.000118038	7.47272e-06		saprotroph
Umbelopsis	0.0040613	0.202376	0.0320046	0.000446966		saprotroph
Valsa	0.0245804	0.129258	3.76304e-05	0.000188044		plant pathogen
Venturia	0.000259254	0.306082	0.000658831	9.56643e-05		plant pathogen
Table. Data of fungal genera that varied significantly by relative abundance between plantation and forest. P-value and r2 shows difference and its magnitude between plantation and forest in particular genera. Exploration type abbrevations: SD:short-distance, C-contact type, MDF-medium distance fringe, MDS-medium distance smooth, LD-long distance type.

## Sheet: abundance_site_EcM
Genus	P-value	r.squared	Estimated marginal means forest	Estimated marginal means pantation	EcM exploration type	EcM lineage	successional type
Amanita	0.0433518	0.105778	0.00912226	1.70416e-05	MDS	amanita	late-successional
Cadophora	0.00100957	0.18244	0.0123184	0.0246626	SD	meliniomyces
Cenococcum	0.00791643	0.125504	0.0435026	0.00958569	SD	cenococcum	early-successional
Genabea	0.0342755	0.115503	-1.21528e-19	0.000239629	SD	genea-humaria
Genea	0.0108549	0.162828	0.000131557	0	SD	genea-humaria
Hebeloma	0.000266747	0.305067	0.00212525	0.014997	SD	hebeloma-alnicola
Humaria	0.00110588	0.252798	0.00472356	-8.67362e-19	SD	genea-humaria
Hydnotrya	0.0195394	0.138729	7.58827e-05	0	C	hydnotrya
Hydnum	0.0125338	0.156958	0.000298327	2.29253e-05	MDS	cantharellus
Hymenogaster	0.00235285	0.223821	0.000642143	0.0167671	SD	hebeloma-alnicola
Lactarius	0.000727545	0.268507	0.00835093	0.00115371	C	russula-lactarius	late-successional
Mallocybe	0.0393074	0.109831	7.7269e-05	0.00063913	SD	inocybe	early-successional
Membranomyces	0.0101468	0.165575	0.00258972	-8.67362e-19	C	clavulina
Protoglossum	0.00239726	0.223093	0.000246776	0.0047054	NA	hebeloma-alnicola
Pulvinula	0.0348156	0.114855	-5.55556e-19	0.00207093	SD	pulvinula
Pustularia	0.0160261	0.146885	-5.55556e-19	0.000908018	SD	pustularia
Sebacina	0.00154468	0.240073	0.0171086	0.00101164	SD	sebacina
Thelephora	0.00863532	0.172125	0.00168973	9.81552e-05	MDS	tomentella-thelephora	early-successional
Tuber	0.00175735	0.235118	0.000721332	0.00613733	SD	tuber-helvella

## Sheet: residuals_age group
	p-value	r2	EcM lineage/lifestyle	EcM exploration type		estimated marginal means	A_hyb	A_nat	B	C		Alnicola.contrast	A_hyb - A_nat	A_hyb - B	A_hyb - C	A_nat - B	A_nat - C	B - C
Alnicola	0.0112961	0.364147	hebeloma-alnicola	SD		Alnicola.emmean	-0.17663	0.295006	-2.49347	-0.17663		Alnicola.estimate	-0.471635	2.31684	-8.77708e-17	2.78848	0.471635	-2.31684
Amphinema	0.00233475	0.446364	amphinema-tylospora	MDF		Amphinema.emmean	-0.999806	0.585741	0.419046	0.650656		Alnicola.p.value	0.709494	0.0277584	1	0.00568389	0.778815	0.0369366
Apiotrichum	0.0378943	0.291387	saprotroph			Apiotrichum.emmean	0.382402	-0.596579	-1.52594	0.129303		Amphinema.contrast	A_hyb - A_nat	A_hyb - B	A_hyb - C	A_nat - B	A_nat - C	B - C
Cenococcum	0.00341135	0.427731	cenococcum	SD		Cenococcum.emmean	-0.666803	0.313987	-0.0273799	1.16755		Amphinema.estimate	-1.58555	-1.41885	-1.65046	0.166695	-0.0649149	-0.23161
Chaetosphaeria	0.00266532	0.439934	saprotroph			Chaetosphaeria.emmean	-0.453062	0.806665	1.10668	-0.0871119		Amphinema.p.value	0.00319076	0.205719	0.00930724	0.994858	0.998928	0.988689
Chalara	0.0122031	0.359777	saprotroph			Chalara.emmean	-0.857985	0.292554	0.708224	0.962699		Apiotrichum.contrast	A_hyb - A_nat	A_hyb - B	A_hyb - C	A_nat - B	A_nat - C	B - C
Clavulina	0.00204416	0.452737	clavulina	C		Clavulina.emmean	-0.743966	0.777844	1.33767	0.414332		Apiotrichum.estimate	0.978981	1.90834	0.253099	0.929364	-0.725882	-1.65525
Cyphellophora	0.00109834	0.481481	saprotroph			Cyphellophora.emmean	-0.124209	-0.124209	2.97928	-0.124209		Apiotrichum.p.value	0.129185	0.075102	0.957264	0.590275	0.451887	0.17266
Delicatula	0.00549321	0.403332	saprotroph			Delicatula.emmean	-0.355506	-0.189041	2.52965	0.148348		Cenococcum.contrast	A_hyb - A_nat	A_hyb - B	A_hyb - C	A_nat - B	A_nat - C	B - C
Dominikia	0.0404118	0.287244	AM			Dominikia.emmean	0.73009	-0.258459	-0.258459	-0.258459		Cenococcum.estimate	-0.98079	-0.639424	-1.83436	0.341367	-0.853567	-1.19493
Elaphomyces	0.021229	0.3274	elaphomyces	SD		Elaphomyces.emmean	-0.108023	-0.108023	-3.09539	0.923775		Cenococcum.p.value	0.0688167	0.76368	0.0018803	0.950828	0.212727	0.322136
Hazslinszkyomyces	0.0421849	0.284461	unknown			Hazslinszkyomyces.emmean	-0.3251	0.127273	1.72197	0.353427		Chaetosphaeria.contrast	A_hyb - A_nat	A_hyb - B	A_hyb - C	A_nat - B	A_nat - C	B - C
Hydnocystis	0.00174815	0.460135	geopora	SD		Hydnocystis.emmean	-0.100028	0.103807	-3.0914	1.02106		Chaetosphaeria.estimate	-1.25973	-1.55975	-0.36595	-0.30002	0.893777	1.1938
Hyphodontia	0.0298918	0.30641	saprotroph			Hyphodontia.emmean	-0.53271	-0.198905	1.85043	-0.0675124		Chaetosphaeria.p.value	0.00401492	0.0520367	0.776557	0.949393	0.100456	0.213104
Idriella	0.0258929	0.315314	saprotroph			Idriella.emmean	-0.310809	0.677759	0.679058	-1.0826		Chalara.contrast	A_hyb - A_nat	A_hyb - B	A_hyb - C	A_nat - B	A_nat - C	B - C
Ilyonectria	0.00759924	0.386043	plant pathogen			Ilyonectria.emmean	0.619059	-0.843644	-0.472195	-0.134945		Chalara.estimate	-1.15054	-1.56621	-1.82068	-0.41567	-0.670145	-0.254475
Inocybe	0.0370386	0.292851	inocybe	SD		Inocybe.emmean	-0.613686	0.372003	1.53947	0.214235		Chalara.p.value	0.0814047	0.224975	0.0116168	0.950115	0.570609	0.989672
Lasiosphaeris	0.0309834	0.304164	saprotroph			Lasiosphaeris.emmean	-0.596795	0.84253	0.675226	-0.388499		Clavulina.contrast	A_hyb - A_nat	A_hyb - B	A_hyb - C	A_nat - B	A_nat - C	B - C
Lepiota	0.00109834	0.481481	saprotroph			Lepiota.emmean	-0.060891	-0.060891	-3.07183	-0.060891		Clavulina.estimate	-1.52181	-2.08164	-1.1583	-0.559827	0.363512	0.923339
Leucogyrophana	0.00988625	0.371609	saprotroph			Leucogyrophana.emmean	-0.205069	0.738083	-3.04624	-0.205069		Clavulina.p.value	0.00302681	0.0226531	0.0736803	0.828753	0.835592	0.557226
Massarina	0.0020722	0.452088	saprotroph			Massarina.emmean	0.856373	-0.142377	-0.511559	-0.511559		Cyphellophora.contrast	A_hyb - A_nat	A_hyb - B	A_hyb - C	A_nat - B	A_nat - C	B - C
Mycena	0.00395727	0.42025	saprotroph			Mycena.emmean	-0.62583	-0.0242213	-0.391347	1.49943		Cyphellophora.estimate	-3.00723e-16	-3.10349	0	-3.10349	3.00723e-16	3.10349
Mycopappus	0.00991037	0.371474	plant pathogen			Mycopappus.emmean	-0.239551	0.742024	-3.16116	-0.239551		Cyphellophora.p.value	1	0.00095067	1	0.000788101	1	0.00152065
Myrothecium	0.0468587	0.0437544	saprotroph			Myrothecium.emmean	0.377202	0.05426	-2.09435	0.481042		Delicatula.contrast	A_hyb - A_nat	A_hyb - B	A_hyb - C	A_nat - B	A_nat - C	B - C
Olpidium	0.025805	0.315524	plant pathogen			Olpidium.emmean	0.552779	-0.134572	-0.134572	-0.134572		Delicatula.estimate	-0.166465	-2.88516	-0.503854	-2.71869	-0.33739	2.3813
Parasola	0.042298	0.284287	saprotroph			Parasola.emmean	-0.0929732	-0.580992	2.44884	-0.0929732		Delicatula.p.value	0.979007	0.00344481	0.743406	0.00512768	0.894298	0.0240712
Ramariopsis	0.00807263	0.382761	saprotroph			Ramariopsis.emmean	-0.137794	0.169827	-2.79277	0.881594		Dominikia.contrast	A_hyb - A_nat	A_hyb - B	A_hyb - C	A_nat - B	A_nat - C	B - C
Rectipilus	0.0139917	0.351953	saprotroph			Rectipilus.emmean	-0.201423	0.060568	1.39197	0.735862		Dominikia.estimate	0.988549	0.988549	0.988549	-7.77156e-16	-7.77156e-16	0
Rhizoctonia	0.024869	0.317791	saprotroph			Rhizoctonia.emmean	0.132488	-0.858645	0.743586	-0.0246682		Dominikia.p.value	0.045767	0.392221	0.106622	1	1	1
Shiraia	0.00162872	0.463446	unknown			Shiraia.emmean	0.574426	-0.40262	-0.40262	-0.40262		Elaphomyces.contrast	A_hyb - A_nat	A_hyb - B	A_hyb - C	A_nat - B	A_nat - C	B - C
Solicoccozyma	0.000729847	0.499503	unknown			Solicoccozyma.emmean	0.759588	-0.640944	0.374367	-1.0979		Elaphomyces.estimate	2.57763e-16	2.98737	-1.0318	2.98737	-1.0318	-4.01917
Tephrocybe	0.0263167	0.314315	saprotroph			Tephrocybe.emmean	-0.134912	-0.578474	2.7189	0.185396		Elaphomyces.p.value	1	0.0624402	0.535918	0.0568266	0.504638	0.0113066
Trichophaea	0.00939179	0.374454	wilcoxina	SD		Trichophaea.emmean	-1.04304	0.269972	0.630583	1.30848		Hazslinszkyomyces.contrast	A_hyb - A_nat	A_hyb - B	A_hyb - C	A_nat - B	A_nat - C	B - C
Xerombrophila	0.038452	0.290449	saprotroph			Xerombrophila.emmean	-0.0743294	0.485406	-3.07855	-0.0743294		Hazslinszkyomyces.estimate	-0.452373	-2.04707	-0.678527	-1.59469	-0.226154	1.36854
												Hazslinszkyomyces.p.value	0.65914	0.028941	0.464959	0.107473	0.955422	0.244134
Table. Data of fungal genera that varied significantly by residual richness between plantation and forest age groups. P-value and r2 show differences and magnitude between age groups of particular genera. Exploration type abbreviations: SD:short-distance, C-contact type, MDF-medium distance fringe, MDS-medium distance smooth, LD-long distance type. Table on the center shows the values of estimate…												Hyphodontia.contrast	A_hyb - A_nat	A_hyb - B	A_hyb - C	A_nat - B	A_nat - C	B - C
												Hyphodontia.estimate	-0.333805	-2.38314	-0.465197	-2.04933	-0.131393	1.91794
												Hyphodontia.p.value	0.858434	0.0170674	0.784662	0.0424776	0.99252	0.0858628
												Idriella.contrast	A_hyb - A_nat	A_hyb - B	A_hyb - C	A_nat - B	A_nat - C	B - C
												Idriella.estimate	-0.988568	-0.989867	0.771794	-0.00129881	1.76036	1.76166
												Idriella.p.value	0.229509	0.674809	0.567373	1	0.023766	0.244045
												Ilyonectria.contrast	A_hyb - A_nat	A_hyb - B	A_hyb - C	A_nat - B	A_nat - C	B - C
												Ilyonectria.estimate	1.4627	1.09125	0.754004	-0.371449	-0.708699	-0.33725
												Ilyonectria.p.value	0.00397685	0.369717	0.348775	0.939453	0.369434	0.960804
												Inocybe.contrast	A_hyb - A_nat	A_hyb - B	A_hyb - C	A_nat - B	A_nat - C	B - C
												Inocybe.estimate	-0.985689	-2.15315	-0.82792	-1.16746	0.157768	1.32523
												Inocybe.p.value	0.144014	0.0457909	0.399261	0.428347	0.988798	0.371157
												Lasiosphaeris.contrast	A_hyb - A_nat	A_hyb - B	A_hyb - C	A_nat - B	A_nat - C	B - C
												Lasiosphaeris.estimate	-1.43933	-1.27202	-0.208296	0.167304	1.23103	1.06372
												Lasiosphaeris.p.value	0.0344418	0.459336	0.983417	0.997123	0.146544	0.637498
												Lepiota.contrast	A_hyb - A_nat	A_hyb - B	A_hyb - C	A_nat - B	A_nat - C	B - C
												Lepiota.estimate	8.59208e-17	3.01094	-2.46716e-16	3.01094	-3.32637e-16	-3.01094
												Lepiota.p.value	1	0.00095067	1	0.000788101	1	0.00152065
												Leucogyrophana.contrast	A_hyb - A_nat	A_hyb - B	A_hyb - C	A_nat - B	A_nat - C	B - C
												Leucogyrophana.estimate	-0.943153	2.84117	7.02167e-16	3.78432	0.943153	-2.84117
												Leucogyrophana.p.value	0.410219	0.0530656	1	0.00577882	0.513744	0.0676832
												Massarina.contrast	A_hyb - A_nat	A_hyb - B	A_hyb - C	A_nat - B	A_nat - C	B - C
												Massarina.estimate	0.99875	1.36793	1.36793	0.369182	0.369182	0
												Massarina.p.value	0.0135799	0.0655429	0.00353486	0.887431	0.696926	1
												Mycena.contrast	A_hyb - A_nat	A_hyb - B	A_hyb - C	A_nat - B	A_nat - C	B - C
												Mycena.estimate	-0.601609	-0.234483	-2.12526	0.367126	-1.52365	-1.89078
												Mycena.p.value	0.5423	0.990163	0.0023725	0.962527	0.0279191	0.118422
												Mycopappus.contrast	A_hyb - A_nat	A_hyb - B	A_hyb - C	A_nat - B	A_nat - C	B - C
												Mycopappus.estimate	-0.981575	2.92161	-4.68111e-16	3.90318	0.981575	-2.92161
												Mycopappus.p.value	0.40345	0.0543548	1	0.0058386	0.507191	0.0692152
												Myrothecium.contrast	A_hyb - A_nat	A_hyb - B	A_hyb - C	A_nat - B	A_nat - C	B - C
												Myrothecium.estimate	0.322942	2.47156	-0.10384	2.14861	-0.426782	-2.57539
												Myrothecium.p.value	0.913978	0.0395867	0.997917	0.0796814	0.870395	0.0401712
												Olpidium.contrast	A_hyb - A_nat	A_hyb - B	A_hyb - C	A_nat - B	A_nat - C	B - C
												Olpidium.estimate	0.687351	0.687351	0.687351	-4.44089e-16	-6.66134e-16	-2.22045e-16
												Olpidium.p.value	0.0298827	0.334851	0.0766421	1	1	1
												Parasola.contrast	A_hyb - A_nat	A_hyb - B	A_hyb - C	A_nat - B	A_nat - C	B - C
												Parasola.estimate	0.488019	-2.54182	8.77708e-17	-3.02983	-0.488019	2.54182
												Parasola.p.value	0.82983	0.0777304	1	0.0242682	0.874414	0.0965693
												Ramariopsis.contrast	A_hyb - A_nat	A_hyb - B	A_hyb - C	A_nat - B	A_nat - C	B - C
												Ramariopsis.estimate	-0.307621	2.65498	-1.01939	2.9626	-0.711767	-3.67437
												Ramariopsis.p.value	0.937221	0.0387645	0.377218	0.0161825	0.640147	0.00439567
												Rectipilus.contrast	A_hyb - A_nat	A_hyb - B	A_hyb - C	A_nat - B	A_nat - C	B - C
												Rectipilus.estimate	-0.261991	-1.5934	-0.937285	-1.33141	-0.675294	0.656113
												Rectipilus.p.value	0.833111	0.0329634	0.0735214	0.0842361	0.244115	0.655111
												Rhizoctonia.contrast	A_hyb - A_nat	A_hyb - B	A_hyb - C	A_nat - B	A_nat - C	B - C
												Rhizoctonia.estimate	0.991133	-0.611099	0.157156	-1.60223	-0.833977	0.768255
												Rhizoctonia.p.value	0.0612827	0.781809	0.983638	0.0826643	0.221846	0.671483
												Shiraia.contrast	A_hyb - A_nat	A_hyb - B	A_hyb - C	A_nat - B	A_nat - C	B - C
												Shiraia.estimate	0.977047	0.977047	0.977047	2.22045e-16	1.11022e-16	-1.11022e-16
												Shiraia.p.value	0.00217048	0.113207	0.00940109	1	1	1
												Solicoccozyma.contrast	A_hyb - A_nat	A_hyb - B	A_hyb - C	A_nat - B	A_nat - C	B - C
												Solicoccozyma.estimate	1.40053	0.385221	1.85748	-1.01531	0.456952	1.47226
												Solicoccozyma.p.value	0.00427888	0.92964	0.00124366	0.386638	0.690246	0.148614
												Tephrocybe.contrast	A_hyb - A_nat	A_hyb - B	A_hyb - C	A_nat - B	A_nat - C	B - C
												Tephrocybe.estimate	0.443562	-2.85381	-0.320308	-3.29738	-0.76387	2.53351
												Tephrocybe.p.value	0.87365	0.0464758	0.96599	0.0155468	0.662176	0.10956
												Trichophaea.contrast	A_hyb - A_nat	A_hyb - B	A_hyb - C	A_nat - B	A_nat - C	B - C
												Trichophaea.estimate	-1.31301	-1.67362	-2.35152	-0.360612	-1.03851	-0.677894
												Trichophaea.p.value	0.105454	0.319234	0.00641363	0.980235	0.357423	0.90358
												Xerombrophila.contrast	A_hyb - A_nat	A_hyb - B	A_hyb - C	A_nat - B	A_nat - C	B - C
												Xerombrophila.estimate	-0.559736	3.00422	2.9257e-17	3.56395	0.559736	-3.00422
												Xerombrophila.p.value	0.833995	0.0700064	1	0.0218102	0.877625	0.087612

## Sheet: residuals_age group_EcM
	p-value	r2	ecm lineage	EcM exploration type	successional stage	Estimated marginal mean	A_hyb	A_nat	B	C		Estimated marginal means	A_hyb - A_nat	A_hyb - B	A_hyb - C	A_nat - B	A_nat - C	B - C
Alnicola	0.0112961	0.364147	hebeloma-alnicola	SD		Alnicola.emmean	-0.17663	0.295006	-2.49347	-0.17663		Alnicola.estimate	-0.471635	2.31684	-8.77708e-17	2.78848	0.471635	-2.31684
Amphinema	0.00233475	0.446364	amphinema-tylospora	MDF		Amphinema.emmean	-0.999806	0.585741	0.419046	0.650656		Alnicola.p.value	0.709494	0.0277584	1	0.00568389	0.778815	0.0369366
Cenococcum	0.00341135	0.427731	cenococcum	SD	early-successional	Cenococcum.emmean	-0.666803	0.313987	-0.0273799	1.16755		Amphinema.contrast	A_hyb - A_nat	A_hyb - B	A_hyb - C	A_nat - B	A_nat - C	B - C
Clavulina	0.00204416	0.452737	clavulina	C		Clavulina.emmean	-0.743966	0.777844	1.33767	0.414332		Amphinema.estimate	-1.58555	-1.41885	-1.65046	0.166695	-0.0649149	-0.23161
Elaphomyces	0.021229	0.3274	elaphomyces	SD		Elaphomyces.emmean	-0.108023	-0.108023	-3.09539	0.923775		Amphinema.p.value	0.00319076	0.205719	0.00930724	0.994858	0.998928	0.988689
Hydnocystis	0.00174815	0.460135	geopora	SD		Hydnocystis.emmean	-0.100028	0.103807	-3.0914	1.02106		Cenococcum.contrast	A_hyb - A_nat	A_hyb - B	A_hyb - C	A_nat - B	A_nat - C	B - C
Trichophaea	0.00939179	0.374454	wilcoxina	SD	early-successional	Trichophaea.emmean	-1.04304	0.269972	0.630583	1.30848		Cenococcum.estimate	-0.98079	-0.639424	-1.83436	0.341367	-0.853567	-1.19493
												Cenococcum.p.value	0.0688167	0.76368	0.0018803	0.950828	0.212727	0.322136
												Clavulina.contrast	A_hyb - A_nat	A_hyb - B	A_hyb - C	A_nat - B	A_nat - C	B - C
												Clavulina.estimate	-1.52181	-2.08164	-1.1583	-0.559827	0.363512	0.923339
												Clavulina.p.value	0.00302681	0.0226531	0.0736803	0.828753	0.835592	0.557226
												Elaphomyces.contrast	A_hyb - A_nat	A_hyb - B	A_hyb - C	A_nat - B	A_nat - C	B - C
												Elaphomyces.estimate	2.57763e-16	2.98737	-1.0318	2.98737	-1.0318	-4.01917
												Elaphomyces.p.value	1	0.0624402	0.535918	0.0568266	0.504638	0.0113066
												Hydnocystis.contrast	A_hyb - A_nat	A_hyb - B	A_hyb - C	A_nat - B	A_nat - C	B - C
												Hydnocystis.estimate	-0.203835	2.99137	-1.12109	3.1952	-0.917257	-4.11246
												Hydnocystis.p.value	0.976938	0.0111882	0.25365	0.00552541	0.388764	0.000792113
												Trichophaea.contrast	A_hyb - A_nat	A_hyb - B	A_hyb - C	A_nat - B	A_nat - C	B - C
												Trichophaea.estimate	-1.31301	-1.67362	-2.35152	-0.360612	-1.03851	-0.677894
												Trichophaea.p.value	0.105454	0.319234	0.00641363	0.980235	0.357423	0.90358

## Sheet: abundance_age group
	P-value	r2	EcM lineage/lifestyle		estimated marginal means	A_hyb	A_nat	B	C		Alnicola.contrast	A_hyb - A_nat	A_hyb - B	A_hyb - C	A_nat - B	A_nat - C	B - C
Alnicola	0.00258862	0.441359	hebeloma-alnicola		Alnicola.emmean	-4.0979e-20	0.000130732	0.0018315	-1.24078e-20		Alnicola.estimate	-0.000130732	-0.0018315	-2.85712e-20	-0.00170077	0.000130732	0.0018315
Apodus	0.0465446	0.278034	saprotroph		Apodus.emmean	0.0184133	0.00620512	0.0106697	0.00665899		Alnicola.p.value	0.953839	0.00179292	1	0.00318046	0.967167	0.0027814
Articulospora	0.0450523	0.280171	saprotroph		Articulospora.emmean	1.80054e-05	0.00130832	0.000368392	0.00159928		Apodus.contrast	A_hyb - A_nat	A_hyb - B	A_hyb - C	A_nat - B	A_nat - C	B - C
Ascobolus	0.000265187	0.541328	saprotroph		Ascobolus.emmean	0.034758	0.00103001	0.004477	0.000846896		Apodus.estimate	0.0122082	0.00774365	0.0117543	-0.00446456	-0.000453868	0.00401069
Betamyces	0.00401294	0.41954	saprotroph		Betamyces.emmean	0.000331093	-1.6263e-19	0.0002035	0		Apodus.p.value	0.0434509	0.73385	0.121744	0.92985	0.999703	0.955737
Boeremia	0.0358228	0.294984	plant pathogen		Boeremia.emmean	0.000321114	1.9584e-05	-1.0842e-19	0		Articulospora.contrast	A_hyb - A_nat	A_hyb - B	A_hyb - C	A_nat - B	A_nat - C	B - C
Carcinomyces	0.0285226	0.309333	mycoparasite		Carcinomyces.emmean	6.14685e-20	0.00035704	0.00119727	0.000918526		Articulospora.estimate	-0.00129031	-0.000350387	-0.00158128	0.000939924	-0.000290965	-0.00123089
Chalara	0.0362062	0.294304	saprotroph		Chalara.emmean	0.00352187	0.000539672	0.0085084	0.00484692		Articulospora.p.value	0.0856614	0.979371	0.0681067	0.713982	0.958515	0.564436
Ciliolarina	0.0368177	0.293234	saprotroph		Ciliolarina.emmean	-2.04895e-20	4.03075e-05	0.0002035	0.000167135		Ascobolus.contrast	A_hyb - A_nat	A_hyb - B	A_hyb - C	A_nat - B	A_nat - C	B - C
Claussenomyces	0.0465002	0.278097	saprotroph		Claussenomyces.emmean	1.28059e-21	2.00373e-05	0.0002035	8.99172e-05		Ascobolus.estimate	0.033728	0.030281	0.0339111	-0.00344699	0.000183118	0.00363011
Clonostachys	0.00468607	0.411597	plant pathogen		Clonostachys.emmean	0.00341372	0.00018905	0.00997151	0.000102659		Ascobolus.p.value	0.000353068	0.0868311	0.00196561	0.991417	0.999995	0.99163
Cortinarius	0.00358135	0.425292	cortinarius		Cortinarius.emmean	0.0749441	0.00955837	0.0104871	0.0156524		Betamyces.contrast	A_hyb - A_nat	A_hyb - B	A_hyb - C	A_nat - B	A_nat - C	B - C
Cyphellophora	0.00109834	0.481481	saprotroph		Cyphellophora.emmean	3.06216e-21	8.30635e-21	0.0002035	3.06216e-21		Betamyces.estimate	0.000331093	0.000127592	0.000331093	-0.0002035	-1.6263e-19	0.0002035
Dactylella	0.016285	0.343139	saprotroph		Dactylella.emmean	0.000526286	2.4392e-05	-1.0842e-19	5.04134e-05		Betamyces.p.value	0.00477874	0.836396	0.0178751	0.537003	1	0.585215
Dictyosporium	0.0306403	0.304862	saprotroph		Dictyosporium.emmean	0.000170196	-2.7105e-20	0.000610501	-5.42101e-20		Boeremia.contrast	A_hyb - A_nat	A_hyb - B	A_hyb - C	A_nat - B	A_nat - C	B - C
Drechslera	0.0405884	0.286962	plant pathogen		Dominikia.emmean	0.000390489	-1.0842e-19	2.1684e-19	1.0842e-19		Boeremia.estimate	0.00030153	0.000321114	0.000321114	1.9584e-05	1.9584e-05	-1.0842e-19
Elaphomyces	0.00155361	0.465642	elaphomyces		Elaphomyces.emmean	4.49867e-20	8.69403e-20	0.00184196	0.000102659		Boeremia.p.value	0.04851	0.3467	0.0823572	0.99957	0.998514	1
Entocybe	0.0456352	0.279329	saprotroph		Entocybe.emmean	-1.02447e-20	9.63959e-05	0.0002035	-5.31016e-20		Carcinomyces.contrast	A_hyb - A_nat	A_hyb - B	A_hyb - C	A_nat - B	A_nat - C	B - C
Exophiala	0.00272999	0.438762	saprotroph		Exophiala.emmean	0.0100112	0.00377331	0.00389184	0.00330944		Carcinomyces.estimate	-0.00035704	-0.00119727	-0.000918526	-0.000840233	-0.000561486	0.000278748
Fontanospora	0.0424458	0.28406	saprotroph		Fontanospora.emmean	1.22937e-19	0.000918518	0.000736784	0.000605911		Carcinomyces.p.value	0.601359	0.101513	0.0513902	0.334673	0.324521	0.948891
Fusarium	0.00812165	0.382431	plant pathogen		Fusarium.emmean	0.011214	0.00325864	0.000794697	0.00155921		Chalara.contrast	A_hyb - A_nat	A_hyb - B	A_hyb - C	A_nat - B	A_nat - C	B - C
Glomus	0.013394	0.354463	AM		Glomus.emmean	0.000348264	3.54995e-05	9.2098e-05	1.0842e-19		Chalara.estimate	0.0029822	-0.00498653	-0.00132504	-0.00796873	-0.00430725	0.00366148
Hebeloma	0.0152197	0.347085	hebeloma-alnicola		Hebeloma.emmean	0.0133704	0.00131476	0.00853374	0.00147499		Chalara.p.value	0.33921	0.372756	0.914853	0.0595223	0.154455	0.65841
Humicola	0.0416016	0.285365	saprotroph		Humicola.emmean	0.000657316	2.16141e-05	1.0842e-19	5.13294e-05		Ciliolarina.contrast	A_hyb - A_nat	A_hyb - B	A_hyb - C	A_nat - B	A_nat - C	B - C
Hydnocystis	0.00417962	0.417467	saprotroph		Hydnocystis.emmean	2.56119e-21	2.16141e-05	0.000610501	0.000155309		Ciliolarina.estimate	-4.03075e-05	-0.0002035	-0.000167135	-0.000163193	-0.000126827	3.63653e-05
Hymenogaster	0.0378921	0.291391	hebeloma-alnicola		Hymenogaster.emmean	0.0194523	0.000496576	0.000610501	0.000919565		Ciliolarina.p.value	0.879336	0.165584	0.0666159	0.318624	0.192777	0.982528
Hyphodontia	0.0243791	0.319008	saprotroph		Hyphodontia.emmean	0.000773699	1.59155e-05	0.000184196	4.35616e-05		Claussenomyces.contrast	A_hyb - A_nat	A_hyb - B	A_hyb - C	A_nat - B	A_nat - C	B - C
Hyphodontiella	0.0140376	0.351764	saprotroph		Hyphodontiella.emmean	1.80639e-05	0.00125495	0.00157009	0.0114973		Claussenomyces.estimate	-2.00373e-05	-0.0002035	-8.99172e-05	-0.000183463	-6.98799e-05	0.000113583
Lepiota	0.00109834	0.481481	saprotroph		Lepiota.emmean	-1.1303e-20	4.42954e-21	0.000276294	-1.1303e-20		Claussenomyces.p.value	0.967151	0.0588337	0.3176	0.0927762	0.500553	0.491912
Leptodiscella	0.00135117	0.472081	saprotroph		Leptodiscella.emmean	0.000470864	-1.0842e-19	-5.42101e-20	-5.42101e-20		Clonostachys.contrast	A_hyb - A_nat	A_hyb - B	A_hyb - C	A_nat - B	A_nat - C	B - C
Leucogyrophana	0.00204314	0.452761	saprotroph		Leucogyrophana.emmean	6.14685e-20	0.000116489	0.00184196	7.57541e-20		Clonostachys.estimate	0.00322466	-0.00655779	0.00331106	-0.00978246	8.63915e-05	0.00986885
Lophiostoma	0.00451445	0.413519	saprotroph		Lophiostoma.emmean	0.000570653	4.16514e-05	0	8.99172e-05		Clonostachys.p.value	0.192952	0.10103	0.293834	0.00628131	0.999956	0.00975325
Massarina	0.00167623	0.462103	saprotroph		Massarina.emmean	0.000447861	3.57943e-05	1.0842e-19	5.42101e-20		Cortinarius.contrast	A_hyb - A_nat	A_hyb - B	A_hyb - C	A_nat - B	A_nat - C	B - C
Mycenella	0.00826974	0.381446	saprotroph		Mycenella.emmean	8.1958e-20	0.000184396	0.000368392	0.000637578		Cortinarius.estimate	0.0653857	0.064457	0.0592917	-0.000928727	-0.00609399	-0.00516527
Mycopappus	0.00113975	0.479815	plant pathogen		Mycopappus.emmean	1.28059e-20	5.53784e-05	0.00773301	-3.00509e-20		Cortinarius.p.value	0.00351127	0.14849	0.0283134	0.999987	0.988143	0.998211
Myrmecridium	0.0300296	0.306123	saprotroph		Myrmecridium.emmean	0.000386551	1.9584e-05	1.6263e-19	5.42101e-20		Cyphellophora.contrast	A_hyb - A_nat	A_hyb - B	A_hyb - C	A_nat - B	A_nat - C	B - C
Myrothecium	0.0179958	0.337261	saprotroph		Myrothecium.emmean	0.000237542	0.000219962	0.0017201	0.000390126		Cyphellophora.estimate	-5.24419e-21	-0.0002035	5.55108e-36	-0.0002035	5.24419e-21	0.0002035
Operculomyces	0.00619644	0.396979	saprotroph		Operculomyces.emmean	0.00364811	0.000376175	0.000276294	0.000100827		Cyphellophora.p.value	1	0.00095067	1	0.000788101	1	0.00152065
Ophiosphaerella	0.00011073	0.574444	saprotroph		Ophiosphaerella.emmean	0.00514969	2.4392e-05	8.67362e-19	8.67362e-19		Dactylella.contrast	A_hyb - A_nat	A_hyb - B	A_hyb - C	A_nat - B	A_nat - C	B - C
Orbilia	0.0350325	0.296405	saprotroph		Orbilia.emmean	0.000279522	0	0	0		Dactylella.estimate	0.000501894	0.000526286	0.000475873	2.4392e-05	-2.60214e-05	-5.04134e-05
Phlebiella	0.043816	0.28199	saprotroph		Phlebiella.emmean	2.36831e-20	-2.54718e-20	-3.75287e-20	0.000257717		Dactylella.p.value	0.0179608	0.238256	0.0693004	0.999718	0.998815	0.99794
Phoma	0.040121	0.287711	plant pathogen		Phoma.emmean	0.00266961	0.000431766	-4.33681e-19	0.000253899		Dictyosporium.contrast	A_hyb - A_nat	A_hyb - B	A_hyb - C	A_nat - B	A_nat - C	B - C
Piloderma	0.0498263	0.273538	piloderma		Piloderma.emmean	0	0.00444498	0.00432699	0.00451029		Dictyosporium.estimate	0.000170196	-0.000440304	0.000170196	-0.000610501	2.7105e-20	0.000610501
Preussia	0.0127427	0.357314	saprotroph		Preussia.emmean	0.00567364	0.000866501	0.001221	-8.67362e-19		Dictyosporium.p.value	0.492257	0.172135	0.619592	0.02923	1	0.0430242
Pustularia	0.0381586	0.290941	pustularia		Pustularia.emmean	0.000446994	-1.0842e-19	-1.0842e-19	0		Drechslera.contrast	A_hyb - A_nat	A_hyb - B	A_hyb - C	A_nat - B	A_nat - C	B - C
Ramariopsis	0.00627402	0.396319	saprotroph		Ramariopsis.emmean	2.17701e-20	2.00373e-05	0.000552588	0.00023208		Drechslera.estimate	0.000699767	0.000699767	0.000699767	-8.67362e-19	-6.50521e-19	2.1684e-19
Ramicandelaber	0.0157571	0.345064	saprotroph		Ramicandelaber.emmean	0.00179831	0.000149491	0.000295598	5.13294e-05		Drechslera.p.value	0.0459571	0.392813	0.106963	1	1	1
Russula	0.00136801	0.471513	russula-lactarius		Russula.emmean	0.00318285	0.0453621	0.04232	0.0461755		Elaphomyces.contrast	A_hyb - A_nat	A_hyb - B	A_hyb - C	A_nat - B	A_nat - C	B - C
Sakaguchia	0.000460139	0.519042	saprotroph		Sakaguchia.emmean	0.000895865	2.81105e-05	1.0842e-19	9.4891e-05		Elaphomyces.estimate	-4.19535e-20	-0.00184196	-0.000102659	-0.00184196	-0.000102659	0.0017393
Schizothecium	0.00607336	0.398042	saprotroph		Schizothecium.emmean	0.00161407	0.000122907	-8.67362e-19	-6.50521e-19		Elaphomyces.p.value	1	0.00121906	0.983889	0.00101523	0.982032	0.00340562
Schwanniomyces	0.0493066	0.274232	saprotroph		Schwanniomyces.emmean	0.000179921	-5.42101e-20	2.7105e-20	-2.7105e-20		Entocybe.contrast	A_hyb - A_nat	A_hyb - B	A_hyb - C	A_nat - B	A_nat - C	B - C
Shiraia	0.01538	0.346476	unknown		Shiraia.emmean	0.00109294	-2.1684e-19	0	0		Entocybe.estimate	-9.63959e-05	-0.0002035	4.28568e-20	-0.000107104	9.63959e-05	0.0002035
Spizellomyces	0.0106468	0.367473	plant pathogen		Spizellomyces.emmean	0.00200588	2.4392e-05	0	4.33681e-19		Entocybe.p.value	0.219896	0.10123	1	0.576519	0.315669	0.123418
Terramyces	0.0104297	0.368626	saprotroph		Terramyces.emmean	1.01216e-20	-6.36795e-21	-4.08883e-20	0.00019166		Exophiala.contrast	A_hyb - A_nat	A_hyb - B	A_hyb - C	A_nat - B	A_nat - C	B - C
Tubeufia	0.0146283	0.349383	saprotroph		Tubeufia.emmean	-1.02447e-20	5.74085e-05	0.000407	4.04087e-21		Exophiala.estimate	0.00623792	0.00611938	0.00670178	-0.000118535	0.000463866	0.000582401
Venturia	0.0473783	0.276866	plant pathogen		Venturia.emmean	0.000118496	0.000792689	0.00066399	0.000411706		Exophiala.p.value	0.00441011	0.166588	0.00950706	0.999972	0.994303	0.997264
Xerombrophila	0.00150954	0.466976	saprotroph		Xerombrophila.emmean	-7.5555e-20	2.16141e-05	0.000814001	-7.28765e-20		Fontanospora.contrast	A_hyb - A_nat	A_hyb - B	A_hyb - C	A_nat - B	A_nat - C	B - C
											Fontanospora.estimate	-0.000918518	-0.000736784	-0.000605911	0.000181734	0.000312607	0.000130873
Table. Data of fungal genera that varied significantly by relative abundance between plantation and forest age groups. P-value and r2 shows difference and its magnitude between age groups in particular genera. Exploration type abbrevations: SD:short-distance, C-contact type, MDF-medium distance fringe, MDS-medium distance smooth, LD-long distance type. Table on the center shows the values of esti…											Fontanospora.p.value	0.0270044	0.510328	0.340586	0.984709	0.796452	0.9951
											Fusarium.contrast	A_hyb - A_nat	A_hyb - B	A_hyb - C	A_nat - B	A_nat - C	B - C
											Fusarium.estimate	0.00795531	0.0104193	0.00965474	0.00246395	0.00169943	-0.000764518
											Fusarium.p.value	0.0236913	0.118533	0.018501	0.9426	0.935316	0.998389
											Glomus.contrast	A_hyb - A_nat	A_hyb - B	A_hyb - C	A_nat - B	A_nat - C	B - C
											Glomus.estimate	0.000312764	0.000256166	0.000348264	-5.65985e-05	3.54995e-05	9.2098e-05
											Glomus.p.value	0.0196556	0.454524	0.0282567	0.98655	0.988415	0.954585
											Hebeloma.contrast	A_hyb - A_nat	A_hyb - B	A_hyb - C	A_nat - B	A_nat - C	B - C
											Hebeloma.estimate	0.0120556	0.00483663	0.0118954	-0.00721898	-0.000160227	0.00705875
											Hebeloma.p.value	0.0163788	0.875014	0.0517586	0.668407	0.999979	0.722011
											Humicola.contrast	A_hyb - A_nat	A_hyb - B	A_hyb - C	A_nat - B	A_nat - C	B - C
											Humicola.estimate	0.000635702	0.000657316	0.000605987	2.16141e-05	-2.97153e-05	-5.13294e-05
											Humicola.p.value	0.0442547	0.358781	0.128841	0.999935	0.999417	0.999279
											Hydnocystis.contrast	A_hyb - A_nat	A_hyb - B	A_hyb - C	A_nat - B	A_nat - C	B - C
											Hydnocystis.estimate	-2.16141e-05	-0.000610501	-0.000155309	-0.000588887	-0.000133695	0.000455191
											Hydnocystis.p.value	0.995011	0.00357895	0.470338	0.00429017	0.563236	0.0476631
											Hymenogaster.contrast	A_hyb - A_nat	A_hyb - B	A_hyb - C	A_nat - B	A_nat - C	B - C
											Hymenogaster.estimate	0.0189558	0.0188418	0.0185328	-0.000113925	-0.00042299	-0.000309065
											Hymenogaster.p.value	0.041096	0.382239	0.109081	1	0.999934	0.999994
											Hyphodontia.contrast	A_hyb - A_nat	A_hyb - B	A_hyb - C	A_nat - B	A_nat - C	B - C
											Hyphodontia.estimate	0.000757783	0.000589503	0.000730137	-0.00016828	-2.76461e-05	0.000140634
											Hyphodontia.p.value	0.0233032	0.518136	0.0769954	0.977324	0.999628	0.988668
											Hyphodontiella.contrast	A_hyb - A_nat	A_hyb - B	A_hyb - C	A_nat - B	A_nat - C	B - C
											Hyphodontiella.estimate	-0.00123689	-0.00155203	-0.0114792	-0.000315139	-0.0102423	-0.00992717
											Hyphodontiella.p.value	0.973955	0.989866	0.0132696	0.999907	0.0233864	0.26719
											Lepiota.contrast	A_hyb - A_nat	A_hyb - B	A_hyb - C	A_nat - B	A_nat - C	B - C
											Lepiota.estimate	-1.57326e-20	-0.000276294	-6.34409e-36	-0.000276294	1.57326e-20	0.000276294
											Lepiota.p.value	1	0.00095067	1	0.000788101	1	0.00152065
											Leptodiscella.contrast	A_hyb - A_nat	A_hyb - B	A_hyb - C	A_nat - B	A_nat - C	B - C
											Leptodiscella.estimate	0.000470864	0.000470864	0.000470864	-5.42101e-20	-5.42101e-20	0
											Leptodiscella.p.value	0.00181757	0.104519	0.00812677	1	1	1
											Leucogyrophana.contrast	A_hyb - A_nat	A_hyb - B	A_hyb - C	A_nat - B	A_nat - C	B - C
											Leucogyrophana.estimate	-0.000116489	-0.00184196	-1.42856e-20	-0.00172547	0.000116489	0.00184196
											Leucogyrophana.p.value	0.965067	0.00143086	1	0.00236063	0.975257	0.00224445
											Lophiostoma.contrast	A_hyb - A_nat	A_hyb - B	A_hyb - C	A_nat - B	A_nat - C	B - C
											Lophiostoma.estimate	0.000529002	0.000570653	0.000480736	4.16514e-05	-4.82658e-05	-8.99172e-05
											Lophiostoma.p.value	0.00493783	0.118185	0.0354901	0.998098	0.989982	0.984647
											Massarina.contrast	A_hyb - A_nat	A_hyb - B	A_hyb - C	A_nat - B	A_nat - C	B - C
											Massarina.estimate	0.000412067	0.000447861	0.000447861	3.57943e-05	3.57943e-05	5.42101e-20
											Massarina.p.value	0.00326432	0.0929064	0.00656732	0.997097	0.990129	1
											Mycenella.contrast	A_hyb - A_nat	A_hyb - B	A_hyb - C	A_nat - B	A_nat - C	B - C
											Mycenella.estimate	-0.000184396	-0.000368392	-0.000637578	-0.000183996	-0.000453182	-0.000269186
											Mycenella.p.value	0.587247	0.473721	0.00499968	0.878428	0.0483508	0.737046
											Mycopappus.contrast	A_hyb - A_nat	A_hyb - B	A_hyb - C	A_nat - B	A_nat - C	B - C
											Mycopappus.estimate	-5.53784e-05	-0.00773301	4.28568e-20	-0.00767763	5.53784e-05	0.00773301
											Mycopappus.p.value	0.999938	0.000954786	1	0.000857994	0.999957	0.00152692
											Myrmecridium.contrast	A_hyb - A_nat	A_hyb - B	A_hyb - C	A_nat - B	A_nat - C	B - C
											Myrmecridium.estimate	0.000366967	0.000386551	0.000386551	1.9584e-05	1.9584e-05	1.0842e-19
											Myrmecridium.p.value	0.0399975	0.329133	0.0739697	0.999737	0.99909	1
											Myrothecium.contrast	A_hyb - A_nat	A_hyb - B	A_hyb - C	A_nat - B	A_nat - C	B - C
											Myrothecium.estimate	1.75801e-05	-0.00148256	-0.000152584	-0.00150014	-0.000170164	0.00132997
											Myrothecium.p.value	0.999884	0.0151747	0.957687	0.0121396	0.936535	0.0431299
											Operculomyces.contrast	A_hyb - A_nat	A_hyb - B	A_hyb - C	A_nat - B	A_nat - C	B - C
											Operculomyces.estimate	0.00327193	0.00337181	0.00354728	9.98811e-05	0.000275348	0.000175467
											Operculomyces.p.value	0.0100464	0.196693	0.0185054	0.999912	0.993785	0.999605
											Ophiosphaerella.contrast	A_hyb - A_nat	A_hyb - B	A_hyb - C	A_nat - B	A_nat - C	B - C
											Ophiosphaerella.estimate	0.0051253	0.00514969	0.00514969	2.4392e-05	2.4392e-05	0
											Ophiosphaerella.p.value	0.000172355	0.032671	0.00107504	0.999999	0.999996	1
											Orbilia.contrast	A_hyb - A_nat	A_hyb - B	A_hyb - C	A_nat - B	A_nat - C	B - C
											Orbilia.estimate	0.000279522	0.000279522	0.000279522	0	0	0
											Orbilia.p.value	0.0399553	0.373174	0.0960144	1	1	1
											Phlebiella.contrast	A_hyb - A_nat	A_hyb - B	A_hyb - C	A_nat - B	A_nat - C	B - C
											Phlebiella.estimate	4.91549e-20	6.12118e-20	-0.000257717	1.20569e-20	-0.000257717	-0.000257717
											Phlebiella.p.value	1	1	0.0586882	1	0.0471446	0.329943
											Phoma.contrast	A_hyb - A_nat	A_hyb - B	A_hyb - C	A_nat - B	A_nat - C	B - C
											Phoma.estimate	0.00223785	0.00266961	0.00241571	0.000431766	0.000177867	-0.000253899
											Phoma.p.value	0.0607023	0.28479	0.0934489	0.990294	0.997587	0.998309
											Piloderma.contrast	A_hyb - A_nat	A_hyb - B	A_hyb - C	A_nat - B	A_nat - C	B - C
											Piloderma.estimate	-0.00444498	-0.00432699	-0.00451029	0.000117985	-6.53096e-05	-0.000183295
											Piloderma.p.value	0.0565144	0.446417	0.117559	0.999973	0.999984	0.999915
											Preussia.contrast	A_hyb - A_nat	A_hyb - B	A_hyb - C	A_nat - B	A_nat - C	B - C
											Preussia.estimate	0.00480713	0.00445263	0.00567364	-0.0003545	0.000866501	0.001221
											Preussia.p.value	0.0236883	0.371142	0.0226272	0.999124	0.959544	0.972173
											Pustularia.contrast	A_hyb - A_nat	A_hyb - B	A_hyb - C	A_nat - B	A_nat - C	B - C
											Pustularia.estimate	0.000446994	0.000446994	0.000446994	0	-1.0842e-19	-1.0842e-19
											Pustularia.p.value	0.0433374	0.384482	0.102232	1	1	1
											Ramariopsis.contrast	A_hyb - A_nat	A_hyb - B	A_hyb - C	A_nat - B	A_nat - C	B - C
											Ramariopsis.estimate	-2.00373e-05	-0.000552588	-0.00023208	-0.000532551	-0.000212043	0.000320508
											Ramariopsis.p.value	0.996367	0.0113349	0.172864	0.0132995	0.20893	0.255697
											Ramicandelaber.contrast	A_hyb - A_nat	A_hyb - B	A_hyb - C	A_nat - B	A_nat - C	B - C
											Ramicandelaber.estimate	0.00164882	0.00150271	0.00174698	-0.000146107	9.81618e-05	0.000244269
											Ramicandelaber.p.value	0.0204552	0.367353	0.040409	0.998389	0.998304	0.993823
											Russula.contrast	A_hyb - A_nat	A_hyb - B	A_hyb - C	A_nat - B	A_nat - C	B - C
											Russula.estimate	-0.0421792	-0.0391372	-0.0429927	0.00304205	-0.000813464	-0.00385552
											Russula.p.value	0.00183018	0.145495	0.00693558	0.998016	0.999867	0.996647
											Sakaguchia.contrast	A_hyb - A_nat	A_hyb - B	A_hyb - C	A_nat - B	A_nat - C	B - C
											Sakaguchia.estimate	0.000867755	0.000895865	0.000800974	2.81105e-05	-6.67806e-05	-9.4891e-05
											Sakaguchia.p.value	0.000526257	0.0487157	0.00612778	0.999745	0.988573	0.992053
											Schizothecium.contrast	A_hyb - A_nat	A_hyb - B	A_hyb - C	A_nat - B	A_nat - C	B - C
											Schizothecium.estimate	0.00149116	0.00161407	0.00161407	0.000122907	0.000122907	-2.1684e-19
											Schizothecium.p.value	0.0102818	0.165707	0.0191167	0.998306	0.994203	1
											Schwanniomyces.contrast	A_hyb - A_nat	A_hyb - B	A_hyb - C	A_nat - B	A_nat - C	B - C
											Schwanniomyces.estimate	0.000179921	0.000179921	0.000179921	-8.13152e-20	-2.7105e-20	5.42101e-20
											Schwanniomyces.p.value	0.0553005	0.41999	0.123308	1	1	1
											Shiraia.contrast	A_hyb - A_nat	A_hyb - B	A_hyb - C	A_nat - B	A_nat - C	B - C
											Shiraia.estimate	0.00109294	0.00109294	0.00109294	-2.1684e-19	-2.1684e-19	0
											Shiraia.p.value	0.0182817	0.277202	0.052165	1	1	1
											Spizellomyces.contrast	A_hyb - A_nat	A_hyb - B	A_hyb - C	A_nat - B	A_nat - C	B - C
											Spizellomyces.estimate	0.00198149	0.00200588	0.00200588	2.4392e-05	2.4392e-05	-4.33681e-19
											Spizellomyces.p.value	0.0134348	0.236055	0.0378843	0.999995	0.999982	1
											Terramyces.contrast	A_hyb - A_nat	A_hyb - B	A_hyb - C	A_nat - B	A_nat - C	B - C
											Terramyces.estimate	1.64895e-20	5.10099e-20	-0.00019166	3.45203e-20	-0.00019166	-0.00019166
											Terramyces.p.value	1	1	0.015926	1	0.0118704	0.178099
											Tubeufia.contrast	A_hyb - A_nat	A_hyb - B	A_hyb - C	A_nat - B	A_nat - C	B - C
											Tubeufia.estimate	-5.74085e-05	-0.000407	-1.42856e-20	-0.000349592	5.74085e-05	0.000407
											Tubeufia.p.value	0.83141	0.0103915	1	0.0284463	0.875633	0.0146738
											Venturia.contrast	A_hyb - A_nat	A_hyb - B	A_hyb - C	A_nat - B	A_nat - C	B - C
											Venturia.estimate	-0.000674193	-0.000545494	-0.00029321	0.000128699	0.000380983	0.000252285
											Venturia.p.value	0.0316818	0.522946	0.692416	0.987141	0.461391	0.927445
											Xerombrophila.contrast	A_hyb - A_nat	A_hyb - B	A_hyb - C	A_nat - B	A_nat - C	B - C
											Xerombrophila.estimate	-2.16141e-05	-0.000814001	-2.67855e-21	-0.000792387	2.16141e-05	0.000814001
											Xerombrophila.p.value	0.997053	0.00117067	1	0.00130524	0.997946	0.00185417

## Sheet: abundance_age group_EcM
	p-value	r2	EcM exploration type	EcM lineage	successional stage		estimated marginal means	A_hyb	A_nat	B	C			A_hyb - A_nat	A_hyb - B	A_hyb - C	A_nat - B	A_nat - C	B - C
Alnicola	0.00258862	0.441359	SD	hebeloma-alnicola			Alnicola.emmean	-4.0979e-20	0.000130732	0.0018315	-1.24078e-20		Alnicola.estimate	-0.000130732	-0.0018315	-2.85712e-20	-0.00170077	0.000130732	0.0018315
Cortinarius	0.00358135	0.425292	MDF	cortinarius	late-successional		Cortinarius.emmean	0.0749441	0.00955837	0.0104871	0.0156524		Alnicola.p.value	0.953839	0.00179292	1	0.00318046	0.967167	0.0027814
Elaphomyces	0.00155361	0.465642	SD	elaphomyces			Elaphomyces.emmean	4.49867e-20	8.69403e-20	0.00184196	0.000102659		Cortinarius.contrast	A_hyb - A_nat	A_hyb - B	A_hyb - C	A_nat - B	A_nat - C	B - C
Hebeloma	0.0152197	0.347085	SD	hebeloma-alnicola			Hebeloma.emmean	0.0133704	0.00131476	0.00853374	0.00147499		Cortinarius.estimate	0.0653857	0.064457	0.0592917	-0.000928727	-0.00609399	-0.00516527
Hymenogaster	0.0378921	0.291391	SD	hebeloma-alnicola			Hymenogaster.emmean	0.0194523	0.000496576	0.000610501	0.000919565		Cortinarius.p.value	0.00351127	0.14849	0.0283134	0.999987	0.988143	0.998211
Piloderma	0.0498263	0.273538	MDF	piloderma			Piloderma.emmean	0	0.00444498	0.00432699	0.00451029		Elaphomyces.contrast	A_hyb - A_nat	A_hyb - B	A_hyb - C	A_nat - B	A_nat - C	B - C
Pustularia	0.0381586	0.290941	SD	pustularia			Pustularia.emmean	0.000446994	-1.0842e-19	-1.0842e-19	0		Elaphomyces.estimate	-4.19535e-20	-0.00184196	-0.000102659	-0.00184196	-0.000102659	0.0017393
Russula	0.00136801	0.471513	C	russula-lactarius	late-successional		Russula.emmean	0.00318285	0.0453621	0.04232	0.0461755		Elaphomyces.p.value	1	0.00121906	0.983889	0.00101523	0.982032	0.00340562
													Hebeloma.contrast	A_hyb - A_nat	A_hyb - B	A_hyb - C	A_nat - B	A_nat - C	B - C
													Hebeloma.estimate	0.0120556	0.00483663	0.0118954	-0.00721898	-0.000160227	0.00705875
													Hebeloma.p.value	0.0163788	0.875014	0.0517586	0.668407	0.999979	0.722011
													Hymenogaster.contrast	A_hyb - A_nat	A_hyb - B	A_hyb - C	A_nat - B	A_nat - C	B - C
													Hymenogaster.estimate	0.0189558	0.0188418	0.0185328	-0.000113925	-0.00042299	-0.000309065
													Hymenogaster.p.value	0.041096	0.382239	0.109081	1	0.999934	0.999994
													Piloderma.contrast	A_hyb - A_nat	A_hyb - B	A_hyb - C	A_nat - B	A_nat - C	B - C
													Piloderma.estimate	-0.00444498	-0.00432699	-0.00451029	0.000117985	-6.53096e-05	-0.000183295
													Piloderma.p.value	0.0565144	0.446417	0.117559	0.999973	0.999984	0.999915
													Pustularia.contrast	A_hyb - A_nat	A_hyb - B	A_hyb - C	A_nat - B	A_nat - C	B - C
													Pustularia.estimate	0.000446994	0.000446994	0.000446994	0	-1.0842e-19	-1.0842e-19
													Pustularia.p.value	0.0433374	0.384482	0.102232	1	1	1
													Russula.contrast	A_hyb - A_nat	A_hyb - B	A_hyb - C	A_nat - B	A_nat - C	B - C
													Russula.estimate	-0.0421792	-0.0391372	-0.0429927	0.00304205	-0.000813464	-0.00385552
													Russula.p.value	0.00183018	0.145495	0.00693558	0.998016	0.999867	0.996647
