# Supplementary material for: Soil mycobiomes in native European aspen forests and hybrid aspen plantations have a similar fungal richness but different compositions, mainly driven by edaphic and floristic factors
Source: Front Microbiol. 2024 May 7;15:1372938. doi: 10.3389/fmicb.2024.1372938 (PMC11106484; doi:10.3389/fmicb.2024.1372938)
Supplement: Supplementary Table S3 — List of sources determining the woody undergrowth species symbiotic status (Supplementary Table S3). [file Table_3.xlsx]

## Sheet: Sheet1
Table S3. List of sources determining the woody undergrowth species symbiotic status.
Genus	Mycorrhizal symbiosis	Source
Salix	EM	https://doi.org/10.1111/j.1469-8137.1990.tb00451.x
Betula	EM	DOI: https://doi.org/10.1017/S026972700000395X
Picea	EM	https://doi.org/10.1111/j.1399-3054.1996.tb00245.x
Populus	EM	DOI: 10.1111/j.1574-6941.2010.01000.x
Quercus	EM	DOI: 10.1007/s00572-009-0278-6
Sorbus	AM	https://era.ed.ac.uk/handle/1842/32172
Acer	mainly AM	https://doi.org/10.1016/0304-4238(91)90159-V
Fraxinus	AM	http://dx.doi.org/10.53846/goediss-4615
Ulmus	non-ecm	https://doi.org/10.1139/b90-076
Tilia	EM	https://doi.org/10.1016/B978-0-12-370526-6.X5001-6
Rhamnus	AM	DOI:10.1007/s11258-018-0816-4
Padus	unknown
Pinus	EM	https://doi.org/10.3390/f13020353
Lonicera	unknown
Corylus	EM	DOI 10.1515/biol-2016-0046
Daphne	unknown
