# Supplementary material for: Soil mycobiomes in native European aspen forests and hybrid aspen plantations have a similar fungal richness but different compositions, mainly driven by edaphic and floristic factors
Source: Front Microbiol. 2024 May 7;15:1372938. doi: 10.3389/fmicb.2024.1372938 (PMC11106484; doi:10.3389/fmicb.2024.1372938)
Supplement: Supplementary Table S4 — Best predictors of soil fungal richness and relative abundance in major fungal trophic groups of hybrid aspen plantations (Supplementary Table S4) and native European aspen stands (Supplementary Table S5). [file Table_4.xlsx]

## Sheet: Table S4 and S5
Table S4. Best predictors of soil fungal richness and relative abundance in major fungal trophic groups of hybrid aspen plantations (N=20). Variation explained (%) was computed by adjusted R-square. Only statistically significant factors are showed.
Fungal group, predictors	Effect direction	Variation explained (%)	P-value
Richness of all fungi
Richness of understorey	-	20	0.027
Abundance of plant pathogens
Soil P concentration	-	37.2	<0.001
Richness of understorey	-	19.4	0.003
Soil C concentration	-	14.3	0.006
Richness of EcM fungi
Stand volume (m3 ha-1)	+	18.7	0.032
Abundance of EcM fungi
Richness of understorey	+	22.3	0.021
Richness of Saprotrophs
Richness of understorey	-	22.5	0.020
Richness of AM
none	NA	NA	NA
Abundance of AM
none	NA	NA	NA
Abundance of Saprotrophs
none	NA	NA	NA
Richness of Plant pathogens
none	NA	NA	NA
Table S5. Best predictors for soil fungal richness and relative abundance in major fungal trophic groups of European aspen stands (N=19). Variation explained (%) was computed by adjusted R-square. Only statistically significant factors are showed.
Fungal group, predictors	Effect direction	Variation explained (%)	P-value
Richness of all fungi
Soil C concentration	-	19.4	0.016
Abundance of plant pathogens
Soil C/N	-	40.8	0.001
Stand volume (m3/ha)	-	9.0	0.027
Richness of EcM fungi
N15	+	29.6	0.006
Richness of understorey	-	23.4	0.011
Abundance of EcM fungi
Soil pH	+	34.3	0.005
Richness of Saprotrophs
Soil C concentration	-	24.8	0.017
Abundance of Saprotrophs
Soil pH	-	48.7	0.001
Abundance of AM
Soil C concentration	-	33.7	0.005
Richness of AM
none	NA	NA	NA
Richness of Plant pathogens
none	NA	NA	NA
