# Supplementary material for: Soil mycobiomes in native European aspen forests and hybrid aspen plantations have a similar fungal richness but different compositions, mainly driven by edaphic and floristic factors
Source: Front Microbiol. 2024 May 7;15:1372938. doi: 10.3389/fmicb.2024.1372938 (PMC11106484; doi:10.3389/fmicb.2024.1372938)
Supplement: Supplementary Table S5 — Permanova and Permdisp main and pairwise results. [file Table_5.xlsx]

## Sheet: Sheet1
Table S6. Main and pairwise permanova test results on plantation and forest fungal communities.
	Plantation and forest
	Fungal group/test	Effect	Pseudo-F	P(perm)	Adj R2	P(disp)	t
	All fungi, main test	Stand type	10.6	<0.001	0.185	0.544	0.64
		Soil pH	2.2901	0.001	0.019
	EcM, main test	Stand type	13.342	0.001	0.227651	0.104	1.77
		Soil pH	2.1183	0.001	0.0134081
	Saprotrophs, main test	Stand type	3.7123	0.001	0.0412585	0.274	1.203
		Soil C	2.5861	0.001	0.020543
		Soil pH	2.5727	0.001	0.0202967
	Plant pathogens, main test	Stand type	5.0109	0.001	0.064997	0.81	0.275
		Soil C	2.046	0.002	0.011
		Soil pH	1.9877	0.002	0.01
	AM, main test	Stand type	5.8858	0.001	0.122	0.102	1.72
		Age class pairs	t	P(perm)		P(disp)	t
	All fungi, pairwise	A_hyb, A_nat	2.6908	0.001		0.799	0.27943
		A_hyb, B	2.5701	0.001		0.888	0.1746
		A_hyb, C	2.6587	0.001		0.884	0.18495
		A_nat, B	1.0298	0.351		0.699	0.44276
		A_nat, C	1.1243	0.114		0.98	0.03573
		B, C	0.92003	0.683		0.796	0.30419
	EcM, pairwise	A_hyb, A_nat	2.9131	0.001		0.579	0.71871
		A_hyb, B	2.7704	0.001		0.869	0.24462
		A_hyb, C	3.0057	0.001		0.816	0.28714
		A_nat, B	0.99065	0.486		0.681	0.46611
		A_nat, C	1.1835	0.065		0.683	0.41084
		B, C	0.95975	0.516		0.97	0.043375
	Saprotrophs, pairwise	A_hyb, A_nat	2.9133	0.001		0.525	0.72564
		A_hyb, B	2.755	0.001		0.896	0.14486
		A_hyb, C	2.808	0.001		0.533	0.85014
		A_nat, B	1.001	0.403		0.484	0.8511
		A_nat, C	1.1429	0.158		0.857	0.2453
		B, C	0.95669	0.5		0.513	0.89484
	Plant pathogens, pairwise	A_hyb, A_nat	2.849	0.001		0.306	1.1673
		A_hyb, B	2.9767	0.001		0.988	0.040358
		A_hyb, C	2.9345	0.001		0.892	0.16716
		A_nat, B	1.0868	0.246		0.494	0.86955
		A_nat, C	0.99099	0.413		0.457	0.79851
		B, C	1.0137	0.405		0.936	0.096006
	AM, pairwise	A_hyb, A_nat	1.6921	0.001		0.557	0.64734
		A_hyb, B	1.7886	0.001		0.024	3.3991
		A_hyb, C	1.8411	0.001		0.114	2.0534
		A_nat, B	0.88515	0.686		0.049	2.319
		A_nat, C	1.0871	0.276		0.277	1.2227
		B, C	0.93408	0.578		0.535	0.75455
	Plantation
	Effect	Pseudo-F	P(perm)	Adj R2
All fungi	Soil pH	2.3952	<0.001	0.0598542
	Soil C	1.5784	0.0028	0.0204988
	Richness of woody understorey sp	1.5083	0.005	0.0171215
	Richness of vascular plants	1.4249	0.0172	0.0131008
EcM	Soil pH	2.7624	<0.001	0.0768964
	Soil C/N	1.7844	0.0034	0.0300033
	Soil P	1.4683	0.0308	0.0148432
Saprotrophs	Soil pH	3.214	<0.001	0.0972121
	Soil C/N	1.5353	0.0084	0.0174189
	Soil C	1.4578	0.02	0.0137386
Plant pathogens	Soil pH	1.9568	0.0012	0.0446925
	Soil C/N	1.6478	0.0144	0.028863
	Forest stand
	Effect	Pseudo-F	P(perm)	Adj R2
All fungi	Soil C	1.9539	0.0026	0.0396599
	Soil pH	1.8107	0.0112	0.0324405
	Stand volume	1.6183	0.0129	0.0227439
	Richness of woody understorey species	1.6243	0.012	0.0230484
EcM	15N	1.7275	0.0109	0.0307838
	Richness of woody understorey species	1.6036	0.0093	0.0243588
	Soil pH	1.5786	0.0187	0.0230635
	Soil C	1.5025	0.0322	0.0191138
Saprotrophs	Soil C	2.5509	0.0018	0.0624978
	Soil pH	1.9837	0.0139	0.0355194
	Stand volume	1.8612	0.01	0.0296961
	Richness of woody understorey species	1.8674	0.0139	0.0299872
Plant pathogens	Soil C	2.4644	0.0014	0.0694529
	Richness of woody understorey species	1.8776	0.0204	0.0389099
AM	Soil P	2.3459	0.0141	0.082339
